# Supplementary material for: Chromosomal Replication Dynamics and Interaction with the β Sliding Clamp Determine Orientation of Bacterial Transposable Elements
Source: PubMed Central journal article supplement — Genome Biol Evol. 2014 Mar 9;6(3):727–40. doi: 10.1093/gbe/evu052 (PMC3971601; doi:10.1093/gbe/evu052), 2014-03-09
Supplement: supp_evu052_GBE_Gomez_Table_S4.pdf [file supp_evu052_GBE_Gomez_Table_S4.pdf]

TABLE S4

| PHYLUM         | CHROMOSOME                                                                     | IS FAMILY | IS  | Same | Anti | p-value   |
|----------------|--------------------------------------------------------------------------------|-----------|-----|------|------|-----------|
| Proteobacteria | Shigella_sonnei_53G_NC_016822                                                  | IS1       | 172 | 101  | 71   | 2,67E-002 |
| Cyanobacteria  | Trichodesmium_erythraeum_IMS101_chromosome_NC_008312                           | IS1       | 14  | 10   | 4    | 1,80E-001 |
| Proteobacteria | Shigella_flexneri_5_str._8401_chromosome_NC_008258                             | IS1       | 110 | 62   | 48   | 2,15E-001 |
| Proteobacteria | Edwardsiella_ictaluri_93-146_chromosome_NC_012779                              | IS1       | 17  | 11   | 6    | 3,32E-001 |
| Proteobacteria | Xenorhabdus_bovienii_SS-2004_chromosome_NC_013892                              | IS1       | 74  | 41   | 33   | 4,16E-001 |
| Proteobacteria | Thiocystis_violascens_DSM_198_chromosome_NC_018012                             | IS1       | 14  | 9    | 5    | 4,24E-001 |
| Cyanobacteria  | Microcystis_aeruginosa_NIES-843_chromosome_NC_010296                           | IS1       | 8   | 5    | 3    | 7,27E-001 |
| Proteobacteria | Escherichia_coli_042_NC_017626                                                 | IS1       | 10  | 6    | 4    | 7,54E-001 |
| Chlamydiae     | Waddlia_chondrophila_WSU_86-1044_chromosome_NC_014225                          | IS1       | 10  | 4    | 6    | 7,54E-001 |
| Proteobacteria | Nitrosococcus_halophilus_Nc4_chromosome_NC_013960                              | IS1       | 12  | 7    | 5    | 7,74E-001 |
| Proteobacteria | Salmonella_enterica_subsp._enterica_serovar_Typhimurium_str._T000240_NC_016860 | IS1       | 14  | 6    | 8    | 7,91E-001 |
| Cyanobacteria  | Acaryochloris_marina_MBIC11017_chromosome_NC_009925                            | IS1       | 18  | 8    | 10   | 8,15E-001 |
| Proteobacteria | Shigella_boydii_CDC_3083-94_chromosome_NC_010658                               | IS1       | 194 | 99   | 95   | 8,30E-001 |
| Bacteroidetes  | Capnocytophaga_canimorsus_Cc5_chromosome_NC_015846                             | IS1       | 11  | 6    | 5    | 1,00E+000 |
| Bacteroidetes  | Salinibacter_ruber_DSM_13855_chromosome_NC_007677                              | IS1       | 9   | 5    | 4    | 1,00E+000 |
| Proteobacteria | Shigella_dysenteriae_Sd197_NC_007606                                           | IS1       | 477 | 238  | 239  | 1,00E+000 |
| Firmicutes     | Streptococcus_suis_D9_chromosome_NC_017620                                     | IS110     | 20  | 3    | 17   | 2,58E-003 |
| Proteobacteria | Alteromonas_macleodii_str._'Deep_ecotype'_chromosome_NC_011138                 | IS110     | 12  | 11   | 1    | 6,35E-003 |
| Proteobacteria | Pseudoalteromonas_atlantica_T6c_chromosome_NC_008228                           | IS110     | 8   | 0    | 8    | 7,81E-003 |
| Actinobacteria | Corynebacterium_diphtheriae_VA01_chromosome_NC_016790                          | IS110     | 7   | 0    | 7    | 1,56E-002 |
| Proteobacteria | Oceanimonas_sp._GK1_chromosome_NC_016745                                       | IS110     | 7   | 7    | 0    | 1,56E-002 |
| Firmicutes     | Clostridium_clariflavum_DSM_19732_chromosome_NC_016627                         | IS110     | 19  | 4    | 15   | 1,92E-002 |
| Firmicutes     | Clostridium_cellulolyticum_H10_chromosome_NC_011898                            | IS110     | 10  | 9    | 1    | 2,15E-002 |
| Proteobacteria | Rickettsia_bellii_OSU_85-389_chromosome_NC_009883                              | IS110     | 26  | 19   | 7    | 2,90E-002 |
| Firmicutes     | Desulfosporosinus_orientis_DSM_765_chromosome_NC_016584                        | IS110     | 6   | 0    | 6    | 3,13E-002 |
| Proteobacteria | Francisella_cf._novicida_Fx1_chromosome_NC_017450                              | IS110     | 6   | 6    | 0    | 3,13E-002 |
| Actinobacteria | Micromonospora_aurantiaca_ATCC_27029_chromosome_NC_014391                      | IS110     | 6   | 6    | 0    | 3,13E-002 |
| Proteobacteria | Saccharophagus_degradans_2-40_chromosome_NC_007912                             | IS110     | 6   | 0    | 6    | 3,13E-002 |
| Bacteroidetes  | Salinibacter_ruber_M8_chromosome_NC_014032                                     | IS110     | 6   | 0    | 6    | 3,13E-002 |
| Proteobacteria | Syntrophus_aciditrophicus_SB_chromosome_NC_007759                              | IS110     | 6   | 6    | 0    | 3,13E-002 |
| Proteobacteria | Vibrio_harveyi_ATCC_BAA-1116_chromosome_chromosome_I_NC_009783                 | IS110     | 33  | 10   | 23   | 3,51E-002 |
| Firmicutes     | Paenibacillus_mucilaginosus_KNP414_chromosome_NC_015690                        | IS110     | 12  | 10   | 2    | 3,86E-002 |
| Actinobacteria | Corynebacterium_jeikeium_K411_chromosome_NC_007164                             | IS110     | 9   | 1    | 8    | 3,91E-002 |
| Bacteroidetes  | Gramella_forsetii_KT0803_chromosome_NC_008571                                  | IS110     | 9   | 8    | 1    | 3,91E-002 |
| Firmicutes     | Thermoanaerobacter_tengcongensis_MB4_NC_003869                                 | IS110     | 9   | 8    | 1    | 3,91E-002 |
| Firmicutes     | Geobacillus_sp._Y412MC52_chromosome_NC_014915                                  | IS110     | 17  | 13   | 4    | 4,90E-002 |
| Firmicutes     | Caldicellulosiruptor_saccharolyticus_DSM_8903_chromosome_NC_009437             | IS110     | 14  | 11   | 3    | 5,74E-002 |
| Proteobacteria | Shigella_sonnei_53G_NC_016822                                                  | IS110     | 19  | 5    | 14   | 6,36E-002 |
| Firmicutes     | Thermoanaerobacter_pseudethanolicus_ATCC_33223_chromosome_NC_010321            | IS110     | 11  | 2    | 9    | 6,54E-002 |
| Actinobacteria | Streptomyces_bingchenggensis_BCW-1_chromosome_NC_016582                        | IS110     | 8   | 7    | 1    | 7,03E-002 |
| Chloroflexi    | Roseiflexus_sp._RS-1_chromosome_NC_009523                                      | IS110     | 40  | 14   | 26   | 8,07E-002 |
| Proteobacteria | Shigella_boydii_CDC_3083-94_chromosome_NC_010658                               | IS110     | 28  | 9    | 19   | 8,72E-002 |
| Proteobacteria | Desulfatibacillum_alkenivorans_AK-01_chromosome_NC_011768                      | IS110     | 13  | 3    | 10   | 9,23E-002 |
| Firmicutes     | Staphylococcus_epidermidis_ATCC_12228_chromosome_NC_004461                     | IS110     | 13  | 10   | 3    | 9,23E-002 |
| Firmicutes     | Geobacillus_thermoleovorans_CCB_US3_UF5_chromosome_NC_016593                   | IS110     | 18  | 13   | 5    | 9,63E-002 |
| Firmicutes     | Lactobacillus_acidophilus_30SC_chromosome_NC_015214                            | IS110     | 18  | 5    | 13   | 9,63E-002 |
| Proteobacteria | Acidovorax_citrulli_AAC00-1_chromosome_NC_008752                               | IS110     | 10  | 8    | 2    | 1,09E-001 |
| Proteobacteria | Orientia_tsutsugamushi_str._Boryong_NC_009488                                  | IS110     | 10  | 2    | 8    | 1,09E-001 |
| Proteobacteria | Desulfomonile_tiedjei_DSM_6799_chromosome_NC_018025                            | IS110     | 20  | 14   | 6    | 1,15E-001 |
| Actinobacteria | Intrasporangium_calvum_DSM_43043_chromosome_NC_014830                          | IS110     | 7   | 1    | 6    | 1,25E-001 |
| Firmicutes     | Amphibacillus_xylanus_NBRC_15112_NC_018704                                     | IS110     | 17  | 5    | 12   | 1,43E-001 |
| Firmicutes     | Bacillus_thuringiensis_Bt407_chromosome_NC_018877                              | IS110     | 17  | 5    | 12   | 1,43E-001 |
| Actinobacteria | Frankia_sp._Ccl3_chromosome_NC_007777                                          | IS110     | 12  | 3    | 9    | 1,46E-001 |
| Proteobacteria | Methylobacterium_extorquens_DM4_NC_012988                                      | IS110     | 12  | 9    | 3    | 1,46E-001 |
| Proteobacteria | Xenorhabdus_bovienii_SS-2004_chromosome_NC_013892                              | IS110     | 31  | 20   | 11   | 1,50E-001 |
| Actinobacteria | Mycobacterium_avium_subsp._paratuberculosis_K-10_NC_002944                     | IS110     | 24  | 16   | 8    | 1,52E-001 |
| Firmicutes     | Desulfotomaculum_reducens_MI-1_chromosome_NC_009253                            | IS110     | 14  | 4    | 10   | 1,80E-001 |
| Proteobacteria | Edwardsiella_ictaluri_93-146_chromosome_NC_012779                              | IS110     | 14  | 10   | 4    | 1,80E-001 |
| Proteobacteria | Idiomarina_loihiensis_L2TR_chromosome_NC_006512                                | IS110     | 14  | 10   | 4    | 1,80E-001 |
| Proteobacteria | Caulobacter_sp._K31_chromosome_NC_010338                                       | IS110     | 9   | 7    | 2    | 1,80E-001 |
| Proteobacteria | Gluconacetobacter_diazotrophicus_PAI_5_uid59075_chromosome_NC_011365           | IS110     | 9   | 7    | 2    | 1,80E-001 |
| Actinobacteria | Mycobacterium_intracellulare_MOTT-02_chromosome_NC_016947                      | IS110     | 9   | 7    | 2    | 1,80E-001 |
| Thermotogae    | Thermosiphon_africanus_TCF52B_NC_011653                                        | IS110     | 9   | 7    | 2    | 1,80E-001 |
| Proteobacteria | Yersinia_enterocolitica_subsp._palaearctica_Y11_NC_017564                      | IS110     | 72  | 30   | 42   | 1,95E-001 |
| Aquificae      | Desulfurobacterium_thermolithotrophum_DSM_11699_chromosome_NC_015185           | IS110     | 16  | 11   | 5    | 2,10E-001 |
| Proteobacteria | Burkholderia_cenocepacia_AU_1054_chromosome_chromosome_1_NC_008060             | IS110     | 6   | 1    | 5    | 2,19E-001 |
| Proteobacteria | Burkholderia_multivorans_ATCC_17616_uid58697_chromosome_2_NC_010086            | IS110     | 6   | 1    | 5    | 2,19E-001 |
| Bacteroidetes  | Dyadobacter_fermentans_DSM_18053_chromosome_NC_013037                          | IS110     | 6   | 5    | 1    | 2,19E-001 |
| Proteobacteria | Pseudomonas_stutzeri_DSM_10701_chromosome_NC_018177                            | IS110     | 6   | 5    | 1    | 2,19E-001 |
| Proteobacteria | Shewanella_frigidimarina_NCIMB_400_chromosome_NC_008345                        | IS110     | 6   | 1    | 5    | 2,19E-001 |
| Spirochaetes   | Treponema_succinifaciens_DSM_2489_chromosome_NC_015385                         | IS110     | 13  | 4    | 9    | 2,67E-001 |
| Actinobacteria | Nakamurella_multipartita_DSM_44233_chromosome_NC_013235                        | IS110     | 40  | 24   | 16   | 2,68E-001 |
| Firmicutes     | Bacillus_halodurans_C-125_chromosome_NC_002570                                 | IS110     | 8   | 6    | 2    | 2,89E-001 |
| Proteobacteria | Bradyrhizobium_sp._BTai1_chromosome_NC_009485                                  | IS110     | 8   | 2    | 6    | 2,89E-001 |
| Proteobacteria | Colwellia_psychrerythraea_34H_chromosome_NC_003910                             | IS110     | 8   | 2    | 6    | 2,89E-001 |
| Proteobacteria | Escherichia_coli_536_NC_008253                                                 | IS110     | 8   | 2    | 6    | 2,89E-001 |
| Bacteroidetes  | Flavobacterium_branchiophilum_FL-15_NC_016001                                  | IS110     | 8   | 2    | 6    | 2,89E-001 |
| Proteobacteria | Hyphomonas_neptunium_ATCC_15444_chromosome_NC_008358                           | IS110     | 8   | 2    | 6    | 2,89E-001 |
| Actinobacteria | Mycobacterium_gilvum_PYR-GCK_chromosome_NC_009338                              | IS110     | 8   | 2    | 6    | 2,89E-001 |
| Firmicutes     | Streptococcus_parasanguinis_FW213_chromosome_NC_017905                         | IS110     | 8   | 2    | 6    | 2,89E-001 |
| Firmicutes     | Thermoanaerobacter_brockii_subsp._finnii_Ako-1_chromosome_NC_014964            | IS110     | 8   | 2    | 6    | 2,89E-001 |

|                       |                                                                                      |       |    |    |    |           |
|-----------------------|--------------------------------------------------------------------------------------|-------|----|----|----|-----------|
| Proteobacteria        | Mesorhizobium_opportunistum_WSM2075_chromosome_NC_015675                             | IS110 | 15 | 5  | 10 | 3,02E-001 |
| Firmicutes            | Oscillibacter_valericigenes_Sjm18-20_NC_016048                                       | IS110 | 24 | 15 | 9  | 3,07E-001 |
| Firmicutes            | Desulfosporosinus_acidiphilus_SJ4_chromosome_NC_018068                               | IS110 | 17 | 6  | 11 | 3,32E-001 |
| Proteobacteria        | Pseudomonas_syringae_pv_tomato_str_DC3000_chromosome_NC_004578                       | IS110 | 10 | 7  | 3  | 3,44E-001 |
| Bacteroidetes         | Spirosoma_linguale_DSM_74_chromosome_NC_013730                                       | IS110 | 10 | 7  | 3  | 3,44E-001 |
| Firmicutes            | Thermosediminibacter_oceani_DSM_16646_chromosome_NC_014377                           | IS110 | 10 | 3  | 7  | 3,44E-001 |
| Proteobacteria        | Coxiella_burnetii_CbuG_Q212_chromosome_NC_011527                                     | IS110 | 28 | 11 | 17 | 3,45E-001 |
| Firmicutes            | Lactobacillus_helveticus_R0052_chromosome_NC_018528                                  | IS110 | 12 | 4  | 8  | 3,88E-001 |
| Proteobacteria        | Legionella_pneumophila_subsp_pneumophila_NC_018139                                   | IS110 | 12 | 4  | 8  | 3,88E-001 |
| Cyanobacteria         | Nostoc_sp_PCC_7120_chromosome_NC_003272                                              | IS110 | 12 | 4  | 8  | 3,88E-001 |
| Proteobacteria        | Rahnella_aquatilis_HX2_chromosome_NC_017047                                          | IS110 | 12 | 8  | 4  | 3,88E-001 |
| Actinobacteria        | Arthrobacter_phenanthrenivorans_Sphe3_chromosome_NC_015145                           | IS110 | 14 | 9  | 5  | 4,24E-001 |
| Proteobacteria        | Bradyrhizobium_japonicum_USDA_110_chromosome_NC_004463                               | IS110 | 14 | 5  | 9  | 4,24E-001 |
| Deferribacteres       | Flexistipes_sinusarabici_DSM_4947_chromosome_NC_015672                               | IS110 | 14 | 9  | 5  | 4,24E-001 |
| Actinobacteria        | Micromonospora_sp_L5_chromosome_NC_014815                                            | IS110 | 14 | 5  | 9  | 4,24E-001 |
| Proteobacteria        | Bordetella_petrii_DSM_12804_chromosome_NC_010170                                     | IS110 | 7  | 2  | 5  | 4,53E-001 |
| Bacteroidetes         | Candidatus_Amoebophilus_asiaticus_5a2_chromosome_NC_010830                           | IS110 | 7  | 5  | 2  | 4,53E-001 |
| Firmicutes            | Clostridium_kluyveri_DSM_555_chromosome_NC_009706                                    | IS110 | 7  | 2  | 5  | 4,53E-001 |
| Proteobacteria        | Cupriavidus_necator_N-1_chromosome_chromosome_2_NC_015723                            | IS110 | 7  | 5  | 2  | 4,53E-001 |
| Bacteroidetes         | Cyclobacterium_marinum_DSM_745_chromosome_NC_015914                                  | IS110 | 7  | 5  | 2  | 4,53E-001 |
| Firmicutes            | Desulfotobacterium_dehalogenans_ATCC_51507_chromosome_NC_018017                      | IS110 | 7  | 5  | 2  | 4,53E-001 |
| Actinobacteria        | Gordonia_polyisoprenivorans_VH2_chromosome_NC_016906                                 | IS110 | 7  | 5  | 2  | 4,53E-001 |
| Firmicutes            | Lactobacillus_crispatus_ST1_NC_014106                                                | IS110 | 7  | 2  | 5  | 4,53E-001 |
| Actinobacteria        | Modestobacter_marinus_NC_017955                                                      | IS110 | 7  | 2  | 5  | 4,53E-001 |
| Proteobacteria        | Nitrosomonas_sp_Is79A3_chromosome_NC_015731                                          | IS110 | 7  | 5  | 2  | 4,53E-001 |
| Proteobacteria        | Roseobacter_litoralis_Och_149_chromosome_NC_015730                                   | IS110 | 7  | 2  | 5  | 4,53E-001 |
| Actinobacteria        | Streptomyces_avermitilis_MA-4680_NC_003155                                           | IS110 | 7  | 2  | 5  | 4,53E-001 |
| Firmicutes            | Thermaerobacter_marianensis_DSM_12885_chromosome_NC_014831                           | IS110 | 7  | 5  | 2  | 4,53E-001 |
| Firmicutes            | Thermoanaerobacterium_saccharolyticum_JW/SL-YS485_chromosome_NC_017992               | IS110 | 7  | 2  | 5  | 4,53E-001 |
| Proteobacteria        | Citrobacter_rodentium_ICC168_NC_013716                                               | IS110 | 18 | 7  | 11 | 4,81E-001 |
| Firmicutes            | Bacillus_coagulans_36D1_chromosome_NC_016023                                         | IS110 | 9  | 3  | 6  | 5,08E-001 |
| Firmicutes            | Desulfotomaculum_acetoxidans_DSM_771_chromosome_NC_013216                            | IS110 | 9  | 3  | 6  | 5,08E-001 |
| Thermotogae           | Fervidobacterium_nodosum_Rt17-B1_chromosome_NC_009718                                | IS110 | 9  | 6  | 3  | 5,08E-001 |
| Firmicutes            | Geobacillus_kaustophilus_HTA426_chromosome_NC_006510                                 | IS110 | 9  | 6  | 3  | 5,08E-001 |
| Firmicutes            | Lactobacillus_buchneri_CD034_chromosome_NC_018610                                    | IS110 | 9  | 6  | 3  | 5,08E-001 |
| Firmicutes            | Lactobacillus_delbrueckii_subsp_bulgaricus_2038_chromosome_NC_017469                 | IS110 | 9  | 3  | 6  | 5,08E-001 |
| Firmicutes            | Kyrpidia_tusciae_DSM_2912_chromosome_NC_014098                                       | IS110 | 11 | 4  | 7  | 5,49E-001 |
| Proteobacteria        | Shewanella_pealeana_ATCC_700345_chromosome_NC_009901                                 | IS110 | 11 | 4  | 7  | 5,49E-001 |
| Proteobacteria        | Sinorhizobium_fredii_HH103_NC_016812                                                 | IS110 | 11 | 4  | 7  | 5,49E-001 |
| Proteobacteria        | Stenotrophomonas_maltophilia_K279a_chromosome_NC_010943                              | IS110 | 11 | 4  | 7  | 5,49E-001 |
| Firmicutes            | Sulfobacillus_acidophilus_DSM_10332_chromosome_NC_016884                             | IS110 | 11 | 4  | 7  | 5,49E-001 |
| Bacteroidetes         | Alistipes_finegoldii_DSM_17242_chromosome_NC_018011                                  | IS110 | 13 | 5  | 8  | 5,81E-001 |
| Proteobacteria        | Methylobacterium_sp_4-46_chromosome_NC_010511                                        | IS110 | 13 | 8  | 5  | 5,81E-001 |
| Thermodesulfobacteria | Thermodesulfatator_indicus_DSM_15286_chromosome_NC_015681                            | IS110 | 13 | 5  | 8  | 5,81E-001 |
| Proteobacteria        | Shewanella_piezotolerans_WP3_chromosome_NC_011566                                    | IS110 | 15 | 9  | 6  | 6,07E-001 |
| Proteobacteria        | Acidiphilium_multivorum_AIU301_NC_015186                                             | IS110 | 17 | 10 | 7  | 6,29E-001 |
| Spirochaetes          | Leptospira_borgpetersenii_serovar_Hardjo-bovis_JB197_chromosome_chromosome_1_NC_0085 | IS110 | 79 | 42 | 37 | 6,53E-001 |
| Firmicutes            | Caldicellulosiruptor_lactoaceticus_6A_chromosome_NC_015949                           | IS110 | 23 | 13 | 10 | 6,78E-001 |
| Proteobacteria        | Acidithiobacillus_ferrivorans_SS3_chromosome_NC_015942                               | IS110 | 6  | 4  | 2  | 6,88E-001 |
| Actinobacteria        | Blastococcus_saxobsidens_DD2_NC_016943                                               | IS110 | 6  | 4  | 2  | 6,88E-001 |
| Proteobacteria        | Burkholderia_vietnamiensis_G4_chromosome_chromosome_1_NC_009256                      | IS110 | 6  | 2  | 4  | 6,88E-001 |
| Firmicutes            | Caldicellulosiruptor_obsidiansis_OB47_chromosome_NC_014392                           | IS110 | 6  | 4  | 2  | 6,88E-001 |
| Proteobacteria        | Caulobacter_crescentus_CB15_chromosome_NC_002696                                     | IS110 | 6  | 2  | 4  | 6,88E-001 |
| Proteobacteria        | Cupriavidus_taiwanensis_LMG_19424_chromosome_chromosome_2_NC_010530                  | IS110 | 6  | 4  | 2  | 6,88E-001 |
| Firmicutes            | Desulfotomaculum_ruminis_DSM_2154_chromosome_NC_015589                               | IS110 | 6  | 2  | 4  | 6,88E-001 |
| Proteobacteria        | Gluconacetobacter_xylinus_NBRC_3288_NC_016027                                        | IS110 | 6  | 4  | 2  | 6,88E-001 |
| Actinobacteria        | Gordonia_sp_KTR9_chromosome_NC_018581                                                | IS110 | 6  | 4  | 2  | 6,88E-001 |
| Firmicutes            | Lactobacillus_amylovorus_GRL_1112_chromosome_NC_014724                               | IS110 | 6  | 2  | 4  | 6,88E-001 |
| Actinobacteria        | Mycobacterium_africanum_GM041182_chromosome_NC_015758                                | IS110 | 6  | 2  | 4  | 6,88E-001 |
| Actinobacteria        | Nocardioides_sp_JS614_chromosome_NC_008699                                           | IS110 | 6  | 4  | 2  | 6,88E-001 |
| Bacteroidetes         | Pedobacter_saltans_DSM_12145_chromosome_NC_015177                                    | IS110 | 6  | 2  | 4  | 6,88E-001 |
| Chlorobi              | Prosthecochloris_aestuarii_DSM_271_chromosome_NC_011059                              | IS110 | 6  | 2  | 4  | 6,88E-001 |
| Proteobacteria        | Pseudomonas_putida_F1_chromosome_NC_009512                                           | IS110 | 6  | 2  | 4  | 6,88E-001 |
| Firmicutes            | Streptococcus_pneumoniae_AP200_chromosome_NC_014494                                  | IS110 | 6  | 2  | 4  | 6,88E-001 |
| Bacteroidetes         | Tannerella_forsythia_ATCC_43037_chromosome_NC_016610                                 | IS110 | 6  | 4  | 2  | 6,88E-001 |
| Firmicutes            | Thermoanaerobacter_italicus_Ab9_chromosome_NC_013921                                 | IS110 | 6  | 2  | 4  | 6,88E-001 |
| Actinobacteria        | Mycobacterium_canettii_CIPT_140010059_NC_015848                                      | IS110 | 8  | 3  | 5  | 7,27E-001 |
| Actinobacteria        | Mycobacterium_rhodesiae_NBB3_chromosome_NC_016604                                    | IS110 | 8  | 3  | 5  | 7,27E-001 |
| Proteobacteria        | Neisseria_meningitidis_FAM18_chromosome_NC_008767                                    | IS110 | 8  | 3  | 5  | 7,27E-001 |
| Proteobacteria        | Photobacterium_profundum_SS9_chromosome_1_NC_006370                                  | IS110 | 8  | 5  | 3  | 7,27E-001 |
| Proteobacteria        | Rhodopseudomonas_palustris_BisA53_chromosome_NC_008435                               | IS110 | 8  | 3  | 5  | 7,27E-001 |
| Proteobacteria        | Sinorhizobium_medicae_WSM419_chromosome_NC_009636                                    | IS110 | 8  | 3  | 5  | 7,27E-001 |
| Actinobacteria        | Streptomyces_hygroscopicus_subsp_jinggangensis_5008_chromosome_NC_017765             | IS110 | 8  | 5  | 3  | 7,27E-001 |
| Firmicutes            | Thermoanaerobacterium_thermosaccharolyticum_DSM_571_chromosome_NC_014410             | IS110 | 8  | 5  | 3  | 7,27E-001 |
| Proteobacteria        | Variovorax_paradoxus_EPS_chromosome_NC_014931                                        | IS110 | 8  | 5  | 3  | 7,27E-001 |
| Proteobacteria        | Acidithiobacillus_ferrooxidans_ATCC_23270_NC_011761                                  | IS110 | 10 | 4  | 6  | 7,54E-001 |
| Proteobacteria        | Aromatoleum_aromaticum_EbN1_chromosome_NC_006513                                     | IS110 | 10 | 6  | 4  | 7,54E-001 |
| Firmicutes            | Clostridium_thermocellum_ATCC_27405_chromosome_NC_009012                             | IS110 | 10 | 6  | 4  | 7,54E-001 |
| Actinobacteria        | Mycobacterium_vanbaalenii_PYR-1_chromosome_NC_008726                                 | IS110 | 10 | 4  | 6  | 7,54E-001 |
| Thermotogae           | Petrogoga_mobilis_SJ95_chromosome_NC_010003                                          | IS110 | 10 | 4  | 6  | 7,54E-001 |
| Firmicutes            | Thermoanaerobacter_wiegellii_Rt8.B1_chromosome_NC_015958                             | IS110 | 10 | 4  | 6  | 7,54E-001 |
| Actinobacteria        | Arthrobacter_arilaitensis_Re117_chromosome_NC_014550                                 | IS110 | 12 | 5  | 7  | 7,74E-001 |
| Proteobacteria        | Azotobacter_vinelandii_DJ_chromosome_NC_012560                                       | IS110 | 12 | 7  | 5  | 7,74E-001 |
| Proteobacteria        | Shewanella_denitrificans_OS217_NC_007954                                             | IS110 | 12 | 5  | 7  | 7,74E-001 |

|                |                                                                                       |        |    |    |    |           |
|----------------|---------------------------------------------------------------------------------------|--------|----|----|----|-----------|
| Proteobacteria | Shewanella_putrefaciens_200_chromosome_NC_017566                                      | IS110  | 12 | 5  | 7  | 7,74E-001 |
| Bacteroidetes  | Sphingobacterium_sp._21_chromosome_NC_015277                                          | IS110  | 12 | 5  | 7  | 7,74E-001 |
| Spirochaetes   | Leptospira_interrogans_serovar_Copenhageni_str._Fiocruz_L1-130_chromosome_chromosome_ | IS110  | 14 | 6  | 8  | 7,91E-001 |
| Proteobacteria | Geobacter_metallireducens_GS-15_chromosome_NC_007517                                  | IS110  | 16 | 9  | 7  | 8,04E-001 |
| Proteobacteria | Acidovorax_sp._JS42_chromosome_NC_008782                                              | IS110  | 20 | 9  | 11 | 8,24E-001 |
| Acidobacteria  | Candidatus_Solibacter_usitatus_Ellin6076_chromosome_NC_008536                         | IS110  | 20 | 11 | 9  | 8,24E-001 |
| Proteobacteria | Dickeya_dadantii_3937_chromosome_NC_014500                                            | IS110  | 20 | 11 | 9  | 8,24E-001 |
| Proteobacteria | Verminephrobacter_eiseniae_EF01-2_chromosome_NC_008786                                | IS110  | 22 | 10 | 12 | 8,32E-001 |
| Proteobacteria | Mesorhizobium_lotii_MAFF303099_chromosome_NC_002678                                   | IS110  | 26 | 12 | 14 | 8,45E-001 |
| Proteobacteria | Nitrobacter_hamburgensis_X14_chromosome_NC_007964                                     | IS110  | 28 | 15 | 13 | 8,51E-001 |
| Proteobacteria | Methylobacterium_nodulans_ORS_2060_chromosome_NC_011894                               | IS110  | 32 | 15 | 17 | 8,60E-001 |
| Proteobacteria | Acidithiobacillus_calidus_SM-1_chromosome_NC_015850                                   | IS110  | 6  | 3  | 3  | 1,00E+000 |
| Proteobacteria | Acidovorax_avenae_subsp._avenae_ATCC_19860_chromosome_NC_015138                       | IS110  | 6  | 3  | 3  | 1,00E+000 |
| Proteobacteria | Agrobacterium_radiobacter_K84_chromosome_2_NC_011983                                  | IS110  | 6  | 3  | 3  | 1,00E+000 |
| Firmicutes     | Bacillus_cellulosilyticus_DSM_2522_chromosome_NC_014829                               | IS110  | 6  | 3  | 3  | 1,00E+000 |
| Actinobacteria | Bifidobacterium_longum_subsp._infantis_ATCC_15697_chromosome_NC_011593                | IS110  | 6  | 3  | 3  | 1,00E+000 |
| Firmicutes     | Caldicellulosiruptor_kristjanssonii_177R1B_chromosome_NC_014721                       | IS110  | 10 | 5  | 5  | 1,00E+000 |
| Firmicutes     | Clostridium_beijerinckii_NCIMB_8052_chromosome_NC_009617                              | IS110  | 6  | 3  | 3  | 1,00E+000 |
| Actinobacteria | Corynebacterium_resistens_DSM_45100_chromosome_NC_015673                              | IS110  | 6  | 3  | 3  | 1,00E+000 |
| Firmicutes     | Dehalobacter_sp._DCA_chromosome_NC_018866                                             | IS110  | 8  | 4  | 4  | 1,00E+000 |
| Proteobacteria | Desulfobacterium_autotrophicum_HRM2_chromosome_NC_012108                              | IS110  | 8  | 4  | 4  | 1,00E+000 |
| Firmicutes     | Geobacillus_thermoglucosidasius_C56-YS93_chromosome_NC_015660                         | IS110  | 6  | 3  | 3  | 1,00E+000 |
| Proteobacteria | Haemophilus_parasuis_SH0165_chromosome_NC_011852                                      | IS110  | 16 | 8  | 8  | 1,00E+000 |
| Actinobacteria | Mycobacterium_chubuense_NBB4_chromosome_NC_018027                                     | IS110  | 10 | 5  | 5  | 1,00E+000 |
| Actinobacteria | Mycobacterium_sp._Spyr1_chromosome_NC_014814                                          | IS110  | 10 | 5  | 5  | 1,00E+000 |
| Firmicutes     | Natranaerobius_thermophilus_JW/NM-WN-LF_chromosome_NC_010718                          | IS110  | 14 | 7  | 7  | 1,00E+000 |
| Proteobacteria | Neisseria_gonorrhoeae_FA_1090_NC_002946                                               | IS110  | 8  | 4  | 4  | 1,00E+000 |
| Proteobacteria | Polaromonas_naphthalenivorans_CJ2_chromosome_NC_008781                                | IS110  | 12 | 6  | 6  | 1,00E+000 |
| Proteobacteria | Pseudomonas_aeruginosa_PAO1_chromosome_NC_002516                                      | IS110  | 6  | 3  | 3  | 1,00E+000 |
| Actinobacteria | Saccharopolyspora_erythraea_NRRL_2338_chromosome_NC_009142                            | IS110  | 8  | 4  | 4  | 1,00E+000 |
| Proteobacteria | Salmonella_enterica_subsp._arizonae_serovar_62:z4_NC_010067                           | IS110  | 6  | 3  | 3  | 1,00E+000 |
| Firmicutes     | Thermacetogenium_phaeum_DSM_12270_chromosome_NC_018870                                | IS110  | 14 | 7  | 7  | 1,00E+000 |
| Firmicutes     | Thermoanaerobacter_sp._X513_chromosome_NC_014538                                      | IS110  | 8  | 4  | 4  | 1,00E+000 |
| Firmicutes     | Thermoanaerobacterium_xylanolyticum_LX-11_chromosome_NC_015555                        | IS110  | 12 | 6  | 6  | 1,00E+000 |
| Proteobacteria | Thioalkalivibrio_sp._K90mix_chromosome_NC_013889                                      | IS110  | 12 | 6  | 6  | 1,00E+000 |
| Proteobacteria | Wolbachia_sp._wRi_NC_012416                                                           | IS110  | 18 | 9  | 9  | 1,00E+000 |
| Bacteroidetes  | Bacteroides_thetaiotaomicron_VPI-5482_chromosome_NC_004663                            | IS110  | 7  | 3  | 4  | 1,00E+000 |
| Proteobacteria | Bordetella_pertussis_CS_chromosome_NC_017223                                          | IS110  | 17 | 8  | 9  | 1,00E+000 |
| Acidobacteria  | Candidatus_Koribacter_versatilis_Ellin345_chromosome_NC_008009                        | IS110  | 7  | 3  | 4  | 1,00E+000 |
| Firmicutes     | Desulfobacterium_hafniense_DCB-2_chromosome_NC_011830                                 | IS110  | 11 | 5  | 6  | 1,00E+000 |
| Proteobacteria | Desulfobacula_toluolica_Tol2_NC_018645                                                | IS110  | 7  | 3  | 4  | 1,00E+000 |
| Proteobacteria | Desulfovibrio_aespoensis_Aspo-2_chromosome_NC_014844                                  | IS110  | 7  | 3  | 4  | 1,00E+000 |
| Proteobacteria | Desulfovibrio_magneticus_RS-1_NC_012796                                               | IS110  | 13 | 7  | 6  | 1,00E+000 |
| Proteobacteria | Dickeya_zeae_Ech1591_chromosome_NC_012912                                             | IS110  | 11 | 6  | 5  | 1,00E+000 |
| Thermotogae    | Fervidobacterium_pennivorans_DSM_9078_chromosome_NC_017095                            | IS110  | 7  | 3  | 4  | 1,00E+000 |
| Acidobacteria  | Granulicella_tundricola_chromosome_NC_015064                                          | IS110  | 7  | 3  | 4  | 1,00E+000 |
| Firmicutes     | Lactobacillus_johnsonii_DPC_6026_chromosome_NC_017477                                 | IS110  | 9  | 4  | 5  | 1,00E+000 |
| Firmicutes     | Lactobacillus_reuteri_SD2112_chromosome_NC_015697                                     | IS110  | 7  | 4  | 3  | 1,00E+000 |
| Thermotogae    | Mesotoga_prima_MesG1.Ag.4.2_chromosome_NC_017934                                      | IS110  | 11 | 6  | 5  | 1,00E+000 |
| Cyanobacteria  | Microcystis_aeruginosa_NIES-843_chromosome_NC_010296                                  | IS110  | 9  | 5  | 4  | 1,00E+000 |
| Actinobacteria | Mycobacterium_bovis_AF2122/97_chromosome_NC_002945                                    | IS110  | 7  | 3  | 4  | 1,00E+000 |
| Actinobacteria | Mycobacterium_smegmatis_str._MC2_155_chromosome_NC_018289                             | IS110  | 7  | 3  | 4  | 1,00E+000 |
| Actinobacteria | Mycobacterium_tuberculosis_CCDC5079_chromosome_NC_017523                              | IS110  | 7  | 3  | 4  | 1,00E+000 |
| Planctomycetes | Planctomyces_brasiliensis_DSM_5305_chromosome_NC_015174                               | IS110  | 7  | 4  | 3  | 1,00E+000 |
| Proteobacteria | Pseudomonas_brassicacearum_subsp._brassicacearum_NFM421_chromosome_NC_015379          | IS110  | 7  | 4  | 3  | 1,00E+000 |
| Actinobacteria | Pseudonocardia_dioxanivorans_CB1190_chromosome_NC_015312                              | IS110  | 19 | 9  | 10 | 1,00E+000 |
| Proteobacteria | Rahnella_sp._Y9602_chromosome_NC_015061                                               | IS110  | 11 | 6  | 5  | 1,00E+000 |
| Proteobacteria | Rhodobacter_sphaeroides_ATCC_17025_chromosome_NC_009428                               | IS110  | 15 | 7  | 8  | 1,00E+000 |
| Actinobacteria | Rhodococcus_jostii_RHA1_chromosome_NC_008268                                          | IS110  | 7  | 4  | 3  | 1,00E+000 |
| Proteobacteria | Shewanella_baltica_OS223_chromosome_NC_011663                                         | IS110  | 7  | 3  | 4  | 1,00E+000 |
| Proteobacteria | Shigella_flexneri_2a_str._301_chromosome_NC_004337                                    | IS110  | 7  | 3  | 4  | 1,00E+000 |
| Actinobacteria | Slackia_heliotrinireducens_DSM_20476_chromosome_NC_013165                             | IS110  | 7  | 4  | 3  | 1,00E+000 |
| Proteobacteria | Sodalis_glossinidius_str._'morsitans'_chromosome_NC_007712                            | IS110  | 11 | 6  | 5  | 1,00E+000 |
| Actinobacteria | Streptomyces_coelicolor_A3(2)_chromosome_NC_003888                                    | IS110  | 7  | 3  | 4  | 1,00E+000 |
| Actinobacteria | Streptomyces_scabiei_87.22_chromosome_NC_013929                                       | IS110  | 11 | 6  | 5  | 1,00E+000 |
| Aquificae      | Sulfurihydrogenibium_sp._YO3AOP1_chromosome_NC_010730                                 | IS110  | 11 | 5  | 6  | 1,00E+000 |
| Actinobacteria | Tsukamurella_paurometabola_DSM_20162_chromosome_NC_014158                             | IS110  | 9  | 5  | 4  | 1,00E+000 |
| Proteobacteria | Xenorhabdus_nematophila_ATCC_19061_chromosome_NC_014228                               | IS110  | 33 | 16 | 17 | 1,00E+000 |
| Proteobacteria | Desulfomonile_tiedjei_DSM_6799_chromosome_NC_018025                                   | IS1182 | 18 | 13 | 5  | 9,63E-002 |
| Firmicutes     | Thermoanaerobacterium_xylanolyticum_LX-11_chromosome_NC_015555                        | IS1182 | 15 | 4  | 11 | 1,18E-001 |
| Proteobacteria | Burkholderia_mallei_ATCC_23344_chromosome_1_NC_006348                                 | IS1182 | 34 | 22 | 12 | 1,21E-001 |
| Actinobacteria | Acidimicrobium_ferrooxidans_DSM_10331_chromosome_NC_013124                            | IS1182 | 7  | 6  | 1  | 1,25E-001 |
| Firmicutes     | Helibacterium_modesticaldum_Ice1_chromosome_NC_010337                                 | IS1182 | 35 | 13 | 22 | 1,75E-001 |
| Firmicutes     | Bacillus_pumilus_SAFR-032_NC_009848                                                   | IS1182 | 9  | 2  | 7  | 1,80E-001 |
| Proteobacteria | Stigmatella_aurantiaca_DW4/3-1_chromosome_NC_014623                                   | IS1182 | 9  | 7  | 2  | 1,80E-001 |
| Proteobacteria | Coralloccoccus_coralloides_DSM_2259_chromosome_NC_017030                              | IS1182 | 6  | 1  | 5  | 2,19E-001 |
| Firmicutes     | Desulfosporosinus_meridiei_DSM_13257_chromosome_NC_018515                             | IS1182 | 6  | 5  | 1  | 2,19E-001 |
| Proteobacteria | Rhodopseudomonas_palustris_BisA53_chromosome_NC_008435                                | IS1182 | 6  | 5  | 1  | 2,19E-001 |
| Firmicutes     | Streptococcus_dysgalactiae_subsp._equisimilis_ATCC_12394_chromosome_NC_017567         | IS1182 | 6  | 5  | 1  | 2,19E-001 |
| Firmicutes     | Thermoanaerobacterium_thermosaccharolyticum_DSM_571_chromosome_NC_014410              | IS1182 | 6  | 1  | 5  | 2,19E-001 |
| Proteobacteria | Sinorhizobium_fredii_USDA_257_chromosome_NC_018000                                    | IS1182 | 8  | 2  | 6  | 2,89E-001 |
| Firmicutes     | Thermosediminibacter_oceani_DSM_16646_chromosome_NC_014377                            | IS1182 | 27 | 16 | 11 | 4,42E-001 |
| Proteobacteria | Hyphomicrobium_sp._MC1_NC_015717                                                      | IS1182 | 7  | 5  | 2  | 4,53E-001 |
| Firmicutes     | Paenibacillus_mucilaginosus_3016_chromosome_NC_016935                                 | IS1182 | 7  | 2  | 5  | 4,53E-001 |

|                 |                                                                                    |        |    |    |    |           |
|-----------------|------------------------------------------------------------------------------------|--------|----|----|----|-----------|
| Firmicutes      | Thermoanaerobacter_tengcongensis_MB4_NC_003869                                     | IS1182 | 7  | 5  | 2  | 4,53E-001 |
| Bacteroidetes   | Zobellia_galactanivorans_NC_015844                                                 | IS1182 | 7  | 5  | 2  | 4,53E-001 |
| Firmicutes      | Clostridium_clariflavum_DSM_19732_chromosome_NC_016627                             | IS1182 | 16 | 10 | 6  | 4,54E-001 |
| Proteobacteria  | Bradyrhizobium_japonicum_USDA_110_chromosome_NC_004463                             | IS1182 | 9  | 6  | 3  | 5,08E-001 |
| Firmicutes      | Clostridium_botulinum_BKT015925_chromosome_NC_015425                               | IS1182 | 15 | 6  | 9  | 6,07E-001 |
| Firmicutes      | Oscillibacter_valericigenes_Sjm18-20_NC_016048                                     | IS1182 | 17 | 7  | 10 | 6,29E-001 |
| Firmicutes      | Caldicellulosiruptor_owensensis_OL_chromosome_NC_014657                            | IS1182 | 6  | 2  | 4  | 6,88E-001 |
| Bacteroidetes   | Cyclobacterium_marinum_DSM_745_chromosome_NC_015914                                | IS1182 | 6  | 4  | 2  | 6,88E-001 |
| Bacteroidetes   | Fluviicola_taffensis_DSM_16823_chromosome_NC_015321                                | IS1182 | 6  | 4  | 2  | 6,88E-001 |
| Proteobacteria  | Rhodospirillum_centenum_SW_chromosome_NC_011420                                    | IS1182 | 6  | 4  | 2  | 6,88E-001 |
| Firmicutes      | Streptococcus_agalactiae_GD201008-001_chromosome_NC_018646                         | IS1182 | 6  | 2  | 4  | 6,88E-001 |
| Firmicutes      | Streptococcus_pyogenes_MGAS10750_chromosome_NC_008024                              | IS1182 | 6  | 4  | 2  | 6,88E-001 |
| Firmicutes      | Enterococcus_hirae_ATCC_9790_chromosome_NC_018081                                  | IS1182 | 8  | 5  | 3  | 7,27E-001 |
| Firmicutes      | Bacillus_cereus_biovar_anthraxis_str_CI_chromosome_NC_014335                       | IS1182 | 10 | 6  | 4  | 7,54E-001 |
| Bacteroidetes   | Belliella_baltica_DSM_15883_chromosome_NC_018010                                   | IS1182 | 10 | 6  | 4  | 7,54E-001 |
| Firmicutes      | Geobacillus_sp._Y4.1MC1_chromosome_NC_014650                                       | IS1182 | 18 | 8  | 10 | 8,15E-001 |
| Proteobacteria  | Methylobacterium_nodulans_ORIS_2060_chromosome_NC_011894                           | IS1182 | 24 | 13 | 11 | 8,39E-001 |
| Firmicutes      | Clostridium_novyi_NT_chromosome_NC_008593                                          | IS1182 | 26 | 12 | 14 | 8,45E-001 |
| Firmicutes      | Anoxybacillus_flavithermus_WK1_chromosome_NC_011567                                | IS1182 | 6  | 3  | 3  | 1,00E+000 |
| Bacteroidetes   | Bacteroides_vulgatus_ATCC_8482_chromosome_NC_009614                                | IS1182 | 10 | 5  | 5  | 1,00E+000 |
| Proteobacteria  | Burkholderia_pseudomallei_668_chromosome_chromosome_I_NC_009074                    | IS1182 | 6  | 3  | 3  | 1,00E+000 |
| Bacteroidetes   | Saprospira_grandis_str._Lewin_chromosome_NC_016940                                 | IS1182 | 6  | 3  | 3  | 1,00E+000 |
| Firmicutes      | Selenomonas_ruminantium_subsp._lactilytica_TAM6421_NC_017068                       | IS1182 | 6  | 3  | 3  | 1,00E+000 |
| Firmicutes      | Staphylococcus_aureus_subsp._aureus_str._Newman_chromosome_NC_009641               | IS1182 | 6  | 3  | 3  | 1,00E+000 |
| Proteobacteria  | Xanthomonas_oryzae_pv._oryzae_KACC10331_chromosome_NC_006834                       | IS1182 | 20 | 10 | 10 | 1,00E+000 |
| Proteobacteria  | Yersinia_enterocolitica_subsp._palearctica_Y11_NC_017564                           | IS1182 | 6  | 3  | 3  | 1,00E+000 |
| Cyanobacteria   | Anabaena_variabilis_ATCC_29413_chromosome_NC_007413                                | IS1182 | 17 | 8  | 9  | 1,00E+000 |
| Firmicutes      | Bacillus_halodurans_C-125_chromosome_NC_002570                                     | IS1182 | 7  | 3  | 4  | 1,00E+000 |
| Firmicutes      | Bacillus_thuringiensis_serovar_konkukian_str._97-27_chromosome_NC_005957           | IS1182 | 15 | 8  | 7  | 1,00E+000 |
| Firmicutes      | Desulfosporosinus_acidiphilus_SJ4_chromosome_NC_018068                             | IS1182 | 7  | 4  | 3  | 1,00E+000 |
| Deferribacteres | Flexistipes_sinusarabici_DSM_4947_chromosome_NC_015672                             | IS1182 | 19 | 9  | 10 | 1,00E+000 |
| Proteobacteria  | Gallibacterium_anatis_UMN179_chromosome_NC_015460                                  | IS1182 | 7  | 4  | 3  | 1,00E+000 |
| Bacteroidetes   | Leadbetterella_byssophila_DSM_17132_chromosome_NC_014655                           | IS1182 | 7  | 4  | 3  | 1,00E+000 |
| Actinobacteria  | Nakamurella_multipartita_DSM_44233_chromosome_NC_013235                            | IS1182 | 11 | 5  | 6  | 1,00E+000 |
| Proteobacteria  | Pseudomonas_syringae_pv._tomato_str._DC3000_chromosome_NC_004578                   | IS1182 | 13 | 7  | 6  | 1,00E+000 |
| Actinobacteria  | Rhodococcus_jostii_RHA1_chromosome_NC_008268                                       | IS1182 | 7  | 3  | 4  | 1,00E+000 |
| Firmicutes      | Syntrophomonas_wolfei_subsp._wolfei_str._Goettingen_chromosome_NC_008346           | IS1182 | 7  | 4  | 3  | 1,00E+000 |
| Proteobacteria  | Verminephrobacter_eiseniae_EF01-2_chromosome_NC_008786                             | IS1182 | 9  | 5  | 4  | 1,00E+000 |
| Actinobacteria  | Nakamurella_multipartita_DSM_44233_chromosome_NC_013235                            | IS1380 | 9  | 2  | 7  | 1,80E-001 |
| Proteobacteria  | Syntrophobacter_fumaroxidans_MPOB_chromosome_NC_008554                             | IS1380 | 6  | 1  | 5  | 2,19E-001 |
| Firmicutes      | Bacillus_coagulans_2-6_chromosome_NC_015634                                        | IS1380 | 8  | 2  | 6  | 2,89E-001 |
| Chlorobi        | Chlorobium_phaeobacteroides_BS1_chromosome_NC_010831                               | IS1380 | 26 | 10 | 16 | 3,27E-001 |
| Proteobacteria  | Marinobacter_aquaeolei_VT8_NC_008740                                               | IS1380 | 7  | 2  | 5  | 4,53E-001 |
| Firmicutes      | Geobacillus_sp._WCH70_chromosome_NC_012793                                         | IS1380 | 9  | 3  | 6  | 5,08E-001 |
| Firmicutes      | Desulfotomaculum_reducens_MI-1_chromosome_NC_009253                                | IS1380 | 11 | 4  | 7  | 5,49E-001 |
| Firmicutes      | Streptococcus_pneumoniae_ST556_chromosome_NC_017769                                | IS1380 | 15 | 6  | 9  | 6,07E-001 |
| Proteobacteria  | Methylobacterium_methanica_MC09_chromosome_NC_015572                               | IS1380 | 6  | 2  | 4  | 6,88E-001 |
| Proteobacteria  | Thauera_sp._MZ1T_chromosome_NC_011662                                              | IS1380 | 6  | 4  | 2  | 6,88E-001 |
| Deferribacteres | Flexistipes_sinusarabici_DSM_4947_chromosome_NC_015672                             | IS1380 | 29 | 13 | 16 | 7,11E-001 |
| Proteobacteria  | Acetobacter_pasteurianus_IFO_3283-01_NC_013209                                     | IS1380 | 47 | 22 | 25 | 7,71E-001 |
| Firmicutes      | Alicyclobacillus_acidocaldarius_subsp._acidocaldarius_Tc-4-1_chromosome_NC_017167  | IS1380 | 12 | 5  | 7  | 7,74E-001 |
| Firmicutes      | Tetragenococcus_halophilus_NBRC_12172_NC_016052                                    | IS1380 | 18 | 10 | 8  | 8,15E-001 |
| Proteobacteria  | Azospirillum_sp._B510_chromosome_NC_013854                                         | IS1380 | 8  | 4  | 4  | 1,00E+000 |
| Firmicutes      | Desulfotomaculum_carboxydivorans_CO-1-SRB_chromosome_NC_015565                     | IS1380 | 8  | 4  | 4  | 1,00E+000 |
| Proteobacteria  | Sinorhizobium_fredii_NGR234_chromosome_NC_012587                                   | IS1380 | 6  | 3  | 3  | 1,00E+000 |
| Proteobacteria  | Methylobacterium_populi_BJ001_chromosome_NC_010725                                 | IS1380 | 15 | 7  | 8  | 1,00E+000 |
| Cyanobacteria   | Microcystis_aeruginosa_NIES-843_chromosome_NC_010296                               | IS1380 | 17 | 8  | 9  | 1,00E+000 |
| Proteobacteria  | Desulfobacula_toluolica_Tol2_NC_018645                                             | IS1595 | 6  | 0  | 6  | 3,13E-002 |
| Spirochaetes    | Turneriella_parva_DSM_21527_chromosome_NC_018020                                   | IS1595 | 6  | 0  | 6  | 3,13E-002 |
| Proteobacteria  | Nitrosomonas_sp._AL212_chromosome_NC_015222                                        | IS1595 | 14 | 11 | 3  | 5,74E-002 |
| Spirochaetes    | Brachyspira_pilosicoli_B2904_chromosome_NC_018607                                  | IS1595 | 8  | 7  | 1  | 7,03E-002 |
| Bacteroidetes   | Psychroflexus_torquis_ATCC_700755_chromosome_NC_018721                             | IS1595 | 18 | 13 | 5  | 9,63E-002 |
| Bacteroidetes   | Odoribacter_splanchnicus_DSM_20712_chromosome_NC_015160                            | IS1595 | 6  | 5  | 1  | 2,19E-001 |
| Proteobacteria  | Photobacterium_profundum_SS9_chromosome_2_NC_006371                                | IS1595 | 8  | 6  | 2  | 2,89E-001 |
| Proteobacteria  | Neisseria_gonorrhoeae_FA_1090_NC_002946                                            | IS1595 | 17 | 11 | 6  | 3,32E-001 |
| Proteobacteria  | Shewanella_oneidensis_MR-1_chromosome_NC_004347                                    | IS1595 | 12 | 4  | 8  | 3,88E-001 |
| Bacteroidetes   | Belliella_baltica_DSM_15883_chromosome_NC_018010                                   | IS1595 | 14 | 5  | 9  | 4,24E-001 |
| Actinobacteria  | Mycobacterium_vanbaalenii_PYR-1_chromosome_NC_008726                               | IS1595 | 7  | 5  | 2  | 4,53E-001 |
| Bacteroidetes   | Cellulophaga_algicola_DSM_14237_chromosome_NC_014934                               | IS1595 | 20 | 8  | 12 | 5,03E-001 |
| Proteobacteria  | Photobacterium_profundum_SS9_chromosome_1_NC_006370                                | IS1595 | 9  | 3  | 6  | 5,08E-001 |
| Spirochaetes    | Spirochaeta_thermophila_DSM_6578_chromosome_NC_017583                              | IS1595 | 11 | 7  | 4  | 5,49E-001 |
| Actinobacteria  | Slackia_heliotrinireducens_DSM_20476_chromosome_NC_013165                          | IS1595 | 13 | 8  | 5  | 5,81E-001 |
| Proteobacteria  | Acidiphilium_multivorum_AIU301_NC_015186                                           | IS1595 | 12 | 7  | 5  | 7,74E-001 |
| Proteobacteria  | Neisseria_meningitidis_053442_chromosome_NC_010120                                 | IS1595 | 14 | 8  | 6  | 7,91E-001 |
| Proteobacteria  | Xanthomonas_oryzae_pv._oryzae_KACC10331_chromosome_NC_006834                       | IS1595 | 68 | 33 | 35 | 9,04E-001 |
| Proteobacteria  | Desulfobrevibacter_aespoeensis_Aspo-2_chromosome_NC_014844                         | IS1595 | 16 | 8  | 8  | 1,00E+000 |
| Proteobacteria  | Francisella_cf._novicida_Fx1_chromosome_NC_017450                                  | IS1595 | 18 | 9  | 9  | 1,00E+000 |
| Bacteroidetes   | Tannerella_forsythia_ATCC_43037_chromosome_NC_016610                               | IS1595 | 10 | 5  | 5  | 1,00E+000 |
| Spirochaetes    | Treponema_succinifaciens_DSM_2489_chromosome_NC_015385                             | IS1595 | 8  | 4  | 4  | 1,00E+000 |
| Proteobacteria  | Candidatus_Accumulibacter_phosphatis_clade_IIA_str._UW-1_chromosome_NC_013194      | IS1595 | 11 | 5  | 6  | 1,00E+000 |
| Proteobacteria  | Haemophilus_somnus_2336_chromosome_NC_010519                                       | IS1595 | 7  | 3  | 4  | 1,00E+000 |
| Spirochaetes    | Spirochaeta_sp._Buddy_chromosome_NC_015152                                         | IS1595 | 7  | 4  | 3  | 1,00E+000 |
| Firmicutes      | Ruminococcus_albus_7_chromosome_NC_014833                                          | IS1595 | 25 | 12 | 13 | 1,00E+000 |
| Firmicutes      | Alicyclobacillus_acidocaldarius_subsp._acidocaldarius_DSM_446_chromosome_NC_013205 | IS1634 | 7  | 6  | 1  | 1,25E-001 |

|                       |                                                                                  |             |    |    |    |           |
|-----------------------|----------------------------------------------------------------------------------|-------------|----|----|----|-----------|
| Proteobacteria        | Photorhabdus_luminescens_subsp._laumondii_TTO1_NC_005126                         | IS1634      | 7  | 6  | 1  | 1,25E-001 |
| Actinobacteria        | Frankia_sp._EAN1pec_chromosome_NC_009921                                         | IS1634      | 8  | 5  | 3  | 7,27E-001 |
| Firmicutes            | Thermacetogenium_phaeum_DSM_12270_chromosome_NC_018870                           | IS1634      | 8  | 3  | 5  | 7,27E-001 |
| Firmicutes            | Geobacillus_kaustophilus_HTA426_chromosome_NC_006510                             | IS1634      | 14 | 6  | 8  | 7,91E-001 |
| Firmicutes            | Desulfotomaculum_acetoxidans_DSM_771_chromosome_NC_013216                        | IS1634      | 6  | 3  | 3  | 1,00E+000 |
| Firmicutes            | Geobacillus_thermoleovorans_CCB_US3_UF5_chromosome_NC_016593                     | IS1634      | 20 | 10 | 10 | 1,00E+000 |
| Firmicutes            | Geobacillus_sp._WCH70_chromosome_NC_012793                                       | IS1634      | 7  | 4  | 3  | 1,00E+000 |
| Proteobacteria        | Hippea_maritima_DSM_10411_chromosome_NC_015318                                   | IS1634      | 7  | 3  | 4  | 1,00E+000 |
| Proteobacteria        | Shewanella_sp._ANA-3_chromosome_chromosome_1_NC_008577                           | IS1634      | 9  | 4  | 5  | 1,00E+000 |
| Cyanobacteria         | Microcystis_aeruginosa_NIES-843_chromosome_NC_010296                             | IS1634      | 37 | 19 | 18 | 1,00E+000 |
| Proteobacteria        | Yersinia_pestis_D106004_chromosome_NC_017154                                     | IS200       | 58 | 48 | 10 | 4,52E-007 |
| Proteobacteria        | Escherichia_coli_CFT073_chromosome_NC_004431                                     | IS200       | 19 | 19 | 0  | 3,81E-006 |
| Firmicutes            | Streptococcus_salivarius_CCHSS3_NC_015760                                        | IS200       | 19 | 18 | 1  | 7,63E-005 |
| Chlorobi              | Chlorobium_phaeobacteroides_DSM_266_chromosome_NC_008639                         | IS200       | 18 | 17 | 1  | 1,45E-004 |
| Firmicutes            | Clostridium_cellulovorans_743B_chromosome_NC_014393                              | IS200       | 13 | 13 | 0  | 2,44E-004 |
| Proteobacteria        | Salmonella_enterica_subsp._enterica_serovar_Typhi_str._CT18_chromosome_NC_003198 | IS200       | 27 | 23 | 4  | 3,11E-004 |
| Firmicutes            | Streptococcus_suis_ST1_chromosome_NC_017950                                      | IS200       | 41 | 32 | 9  | 4,31E-004 |
| Proteobacteria        | Photobacterium_profundum_SS9_chromosome_1_NC_006370                              | IS200       | 16 | 15 | 1  | 5,19E-004 |
| Firmicutes            | Clostridium_thermocellum_DSM_1313_chromosome_NC_017304                           | IS200       | 11 | 11 | 0  | 9,77E-004 |
| Firmicutes            | Clostridium_cellulolyticum_H10_chromosome_NC_011898                              | IS200       | 10 | 10 | 0  | 1,95E-003 |
| Firmicutes            | Clostridium_clariflavum_DSM_19732_chromosome_NC_016627                           | IS200       | 10 | 10 | 0  | 1,95E-003 |
| Proteobacteria        | Rahnella_aquatilis_CIP_78.65_=_ATCC_33071_chromosome_NC_016818                   | IS200       | 9  | 9  | 0  | 3,91E-003 |
| Proteobacteria        | Shewanella_amazonensis_SB2B_chromosome_NC_008700                                 | IS200       | 9  | 9  | 0  | 3,91E-003 |
| Proteobacteria        | Photobacterium_profundum_SS9_chromosome_2_NC_006371                              | IS200       | 12 | 11 | 1  | 6,35E-003 |
| Firmicutes            | Alkaliphilus_metalliredigens_QYMF_chromosome_NC_009633                           | IS200       | 8  | 8  | 0  | 7,81E-003 |
| Firmicutes            | Bacillus_halodurans_C-125_chromosome_NC_002570                                   | IS200       | 8  | 8  | 0  | 7,81E-003 |
| Firmicutes            | Roseburia_hominis_A2-183_chromosome_NC_015977                                    | IS200       | 7  | 7  | 0  | 1,56E-002 |
| Firmicutes            | Tetragenococcus_halophilus_NBRC_12172_NC_016052                                  | IS200       | 7  | 7  | 0  | 1,56E-002 |
| Deinococcus-Thermus   | Truepera_radiovictrix_DSM_17093_chromosome_NC_014221                             | IS200       | 7  | 7  | 0  | 1,56E-002 |
| Proteobacteria        | Alcanivorax_dieselolei_B5_chromosome_NC_018691                                   | IS200       | 6  | 6  | 0  | 3,13E-002 |
| Firmicutes            | Staphylococcus_aureus_subsp._aureus_HO_5096_0412_NC_017763                       | IS200       | 6  | 6  | 0  | 3,13E-002 |
| Firmicutes            | Syntrophomonas_wolfei_subsp._wolfei_str._Goettingen_chromosome_NC_008346         | IS200       | 6  | 6  | 0  | 3,13E-002 |
| Firmicutes            | Thermoanaerobacterium_xylanolyticum_LX-11_chromosome_NC_015555                   | IS200       | 6  | 6  | 0  | 3,13E-002 |
| Proteobacteria        | Rickettsia_massiliae_MTU5_chromosome_NC_009900                                   | IS200       | 11 | 9  | 2  | 6,54E-002 |
| Proteobacteria        | Shewanella_woodyi_ATCC_51908_chromosome_NC_010506                                | IS200       | 11 | 9  | 2  | 6,54E-002 |
| Ignavibacteria        | Ignavibacterium_album_JCM_16511_chromosome_NC_017464                             | IS200       | 8  | 7  | 1  | 7,03E-002 |
| Proteobacteria        | Nitratifactor_salsuginis_DSM_16511_chromosome_NC_014935                          | IS200       | 8  | 7  | 1  | 7,03E-002 |
| Proteobacteria        | Nitrosococcus_halophilus_Nc4_chromosome_NC_013960                                | IS200       | 8  | 7  | 1  | 7,03E-002 |
| Proteobacteria        | Rickettsia_australis_str._Cutlack_chromosome_NC_017058                           | IS200       | 21 | 15 | 6  | 7,84E-002 |
| Proteobacteria        | Yersinia_pseudotuberculosis_IP_31758_chromosome_NC_009708                        | IS200       | 15 | 11 | 4  | 1,18E-001 |
| Proteobacteria        | Aromatoleum_aromaticum_EbN1_chromosome_NC_006513                                 | IS200       | 7  | 6  | 1  | 1,25E-001 |
| Proteobacteria        | Pasteurella_multocida_36950_chromosome_NC_016808                                 | IS200       | 7  | 6  | 1  | 1,25E-001 |
| Proteobacteria        | Rickettsia_akari_str._Hartford_chromosome_NC_009881                              | IS200       | 12 | 9  | 3  | 1,46E-001 |
| Firmicutes            | Filifactor_alocis_ATCC_35896_chromosome_NC_016630                                | IS200       | 9  | 7  | 2  | 1,80E-001 |
| Firmicutes            | Clostridium_tetani_E88_chromosome_NC_004557                                      | IS200       | 6  | 5  | 1  | 2,19E-001 |
| Proteobacteria        | Desulfomonile_tiedjei_DSM_6799_chromosome_NC_018025                              | IS200       | 6  | 5  | 1  | 2,19E-001 |
| Proteobacteria        | Methylomicrobium_alcaliphilum_chromosome_NC_016112                               | IS200       | 6  | 5  | 1  | 2,19E-001 |
| Proteobacteria        | Pelobacter_carbinolicus_DSM_2380_chromosome_NC_007498                            | IS200       | 6  | 5  | 1  | 2,19E-001 |
| Firmicutes            | Thermoanaerobacterium_saccharolyticum_JW/SL-YS485_chromosome_NC_017992           | IS200       | 6  | 5  | 1  | 2,19E-001 |
| Bacteroidetes         | Cytophaga_hutchinsonii_ATCC_33406_chromosome_NC_008255                           | IS200       | 8  | 2  | 6  | 2,89E-001 |
| Bacteroidetes         | Psychroflexus_torquis_ATCC_700755_chromosome_NC_018721                           | IS200       | 8  | 6  | 2  | 2,89E-001 |
| Bacteroidetes         | Spirosoma_linguale_DSM_74_chromosome_NC_013730                                   | IS200       | 8  | 2  | 6  | 2,89E-001 |
| Bacteroidetes         | Flexibacter_litoralis_DSM_6794_chromosome_NC_018018                              | IS200       | 15 | 10 | 5  | 3,02E-001 |
| Firmicutes            | Lactobacillus_reuteri_DSM_20016_chromosome_NC_009513                             | IS200       | 15 | 10 | 5  | 3,02E-001 |
| Planctomycetes        | Rhodopirellula_baltica_SH_1_chromosome_NC_005027                                 | IS200       | 7  | 5  | 2  | 4,53E-001 |
| Proteobacteria        | Rickettsia_canadensis_str._McKiel_NC_009879                                      | IS200       | 7  | 5  | 2  | 4,53E-001 |
| Bacteroidetes         | Runella_slithyformis_DSM_19594_chromosome_NC_015703                              | IS200       | 7  | 2  | 5  | 4,53E-001 |
| Thermodesulfobacteria | Thermodesulfatator_indicus_DSM_15286_chromosome_NC_015681                        | IS200       | 7  | 2  | 5  | 4,53E-001 |
| Proteobacteria        | Geobacter_uraniireducens_Rf4_chromosome_NC_009483                                | IS200       | 9  | 6  | 3  | 5,08E-001 |
| Proteobacteria        | Thioalkalivibrio_sp._K90mix_chromosome_NC_013889                                 | IS200       | 9  | 6  | 3  | 5,08E-001 |
| Cyanobacteria         | Synechococcus_sp._JA-3-3Ab_chromosome_NC_007775                                  | IS200       | 15 | 6  | 9  | 6,07E-001 |
| Chloroflexi           | Chloroflexus_aggregans_DSM_9485_chromosome_NC_011831                             | IS200       | 6  | 4  | 2  | 6,88E-001 |
| Bacteroidetes         | Flavobacterium_johnsoniae_UW101_chromosome_NC_009441                             | IS200       | 6  | 4  | 2  | 6,88E-001 |
| Bacteroidetes         | Haliscomenobacter_hydrossis_DSM_1100_chromosome_NC_015510                        | IS200       | 6  | 2  | 4  | 6,88E-001 |
| Proteobacteria        | Nitrosomonas_sp._AL212_chromosome_NC_015222                                      | IS200       | 6  | 2  | 4  | 6,88E-001 |
| Cyanobacteria         | Prochlorococcus_marinus_str._MIT_9303_chromosome_NC_008820                       | IS200       | 6  | 2  | 4  | 6,88E-001 |
| Proteobacteria        | Sulfurovum_sp._NBC37-1_chromosome_NC_009663                                      | IS200       | 6  | 4  | 2  | 6,88E-001 |
| Bacteroidetes         | Candidatus_Amoebophilus_asiaticus_5a2_chromosome_NC_010830                       | IS200       | 8  | 5  | 3  | 7,27E-001 |
| Cyanobacteria         | Cyanothece_sp._PCC_7424_chromosome_NC_011729                                     | IS200       | 8  | 3  | 5  | 7,27E-001 |
| Proteobacteria        | Photorhabdus_luminescens_subsp._laumondii_TTO1_NC_005126                         | IS200       | 8  | 5  | 3  | 7,27E-001 |
| Proteobacteria        | Desulfatibacillum_alkenivorans_AK-01_chromosome_NC_011768                        | IS200       | 14 | 8  | 6  | 7,91E-001 |
| Proteobacteria        | Anaeromyxobacter_dehalogenans_2CP-1_chromosome_NC_011891                         | IS200       | 8  | 4  | 4  | 1,00E+000 |
| Firmicutes            | Desulfotomaculum_acetoxidans_DSM_771_chromosome_NC_013216                        | IS200       | 6  | 3  | 3  | 1,00E+000 |
| Cyanobacteria         | Microcystis_aeruginosa_NIES-843_chromosome_NC_010296                             | IS200       | 8  | 4  | 4  | 1,00E+000 |
| Firmicutes            | Selenomonas_sputigena_ATCC_35185_chromosome_NC_015437                            | IS200       | 6  | 3  | 3  | 1,00E+000 |
| Proteobacteria        | Anaeromyxobacter_sp._K_chromosome_NC_011145                                      | IS200       | 7  | 3  | 4  | 1,00E+000 |
| Bacteroidetes         | Emticicia_oligotrophica_DSM_17448_chromosome_NC_018748                           | IS200       | 7  | 3  | 4  | 1,00E+000 |
| Proteobacteria        | Methylomonas_methanica_MC09_chromosome_NC_015572                                 | IS200       | 13 | 7  | 6  | 1,00E+000 |
| Planctomycetes        | Planctomyces_brasiliensis_DSM_5305_chromosome_NC_015174                          | IS200       | 7  | 4  | 3  | 1,00E+000 |
| Proteobacteria        | Thiocystis_violascens_DSM_198_chromosome_NC_018012                               | IS200       | 7  | 3  | 4  | 1,00E+000 |
| Proteobacteria        | Xenorhabdus_nematophila_ATCC_19061_chromosome_NC_014228                          | IS200       | 9  | 4  | 5  | 1,00E+000 |
| Firmicutes            | Lactobacillus_reuteri_SD2112_chromosome_NC_015697                                | IS200_IS605 | 14 | 14 | 0  | 1,22E-004 |
| Firmicutes            | Lactobacillus_sanfranciscensis_TMW_1.1304_chromosome_NC_015978                   | IS200_IS605 | 8  | 8  | 0  | 7,81E-003 |
| Firmicutes            | Clostridium_perfringens_SM101_chromosome_NC_008262                               | IS200_IS605 | 12 | 10 | 2  | 3,86E-002 |

|                     |                                                                               |             |    |    |    |           |
|---------------------|-------------------------------------------------------------------------------|-------------|----|----|----|-----------|
| Proteobacteria      | Proteus_mirabilis_HI4320_chromosome_NC_010554                                 | IS200_IS605 | 12 | 2  | 10 | 3,86E-002 |
| Chloroflexi         | Chloroflexus_aggregans_DSM_9485_chromosome_NC_011831                          | IS200_IS605 | 7  | 1  | 6  | 1,25E-001 |
| Firmicutes          | Desulfotomaculum_acetoxidans_DSM_771_chromosome_NC_013216                     | IS200_IS605 | 7  | 6  | 1  | 1,25E-001 |
| Firmicutes          | Clostridium_difficile_BI1_NC_017179                                           | IS200_IS605 | 6  | 5  | 1  | 2,19E-001 |
| Actinobacteria      | Frankia_sp._EAN1pec_chromosome_NC_009921                                      | IS200_IS605 | 6  | 5  | 1  | 2,19E-001 |
| Proteobacteria      | Helicobacter_cetorum_MIT_99-5656_chromosome_NC_017735                         | IS200_IS605 | 20 | 12 | 8  | 5,03E-001 |
| Cyanobacteria       | Cyanothece_sp._PCC_7424_chromosome_NC_011729                                  | IS200_IS605 | 6  | 4  | 2  | 6,88E-001 |
| Deinococcus-Thermus | Deinococcus_radiodurans_R1_chromosome_chromosome_1_NC_001263                  | IS200_IS605 | 8  | 3  | 5  | 7,27E-001 |
| Firmicutes          | Lactobacillus_fermentum_IFO_3956_NC_010610                                    | IS200_IS605 | 8  | 3  | 5  | 7,27E-001 |
| Cyanobacteria       | Thermosynechococcus_elongatus_BP-1_chromosome_NC_004113                       | IS200_IS605 | 12 | 7  | 5  | 7,74E-001 |
| Proteobacteria      | Helicobacter_pylori_26695_NC_000915                                           | IS200_IS605 | 6  | 3  | 3  | 1,00E+000 |
| Firmicutes          | Lactobacillus_amylovorus_GRL1118_chromosome_NC_017470                         | IS200_IS605 | 6  | 3  | 3  | 1,00E+000 |
| Cyanobacteria       | Microcystis_aeruginosa_NIES-843_chromosome_NC_010296                          | IS200_IS605 | 6  | 3  | 3  | 1,00E+000 |
| Firmicutes          | Desulfosporosinus_orientis_DSM_765_chromosome_NC_016584                       | IS21        | 14 | 13 | 1  | 1,83E-003 |
| Proteobacteria      | Sorangium_cellulosum_'So_ce_56'_chromosome_NC_010162                          | IS21        | 7  | 0  | 7  | 1,56E-002 |
| Proteobacteria      | Burkholderia_multivorans_ATCC_17616_uid58697_chromosome_1_NC_010084           | IS21        | 6  | 0  | 6  | 3,13E-002 |
| Firmicutes          | Bacillus_thuringiensis_serovar_chinensis_CT-43_chromosome_NC_017208           | IS21        | 9  | 8  | 1  | 3,91E-002 |
| Proteobacteria      | Yersinia_pestis_KIM_10_chromosome_NC_004088                                   | IS21        | 35 | 11 | 24 | 4,10E-002 |
| Proteobacteria      | Acidithiobacillus_ferroxidans_ATCC_53993_chromosome_NC_011206                 | IS21        | 8  | 7  | 1  | 7,03E-002 |
| Proteobacteria      | Alteromonas_sp._SN2_chromosome_NC_015554                                      | IS21        | 8  | 7  | 1  | 7,03E-002 |
| Actinobacteria      | Corynebacterium_efficiens_YS-314_chromosome_NC_004369                         | IS21        | 8  | 7  | 1  | 7,03E-002 |
| Proteobacteria      | Methylobacterium_sp._4-46_chromosome_NC_010511                                | IS21        | 8  | 1  | 7  | 7,03E-002 |
| Proteobacteria      | Thauera_sp._MZ1T_chromosome_NC_011662                                         | IS21        | 10 | 8  | 2  | 1,09E-001 |
| Chlorobi            | Chlorobium_phaeobacteroides_DSM_266_chromosome_NC_008639                      | IS21        | 27 | 18 | 9  | 1,22E-001 |
| Actinobacteria      | Microtholunatus_phosphovorus_NM-1_NC_015635                                   | IS21        | 7  | 6  | 1  | 1,25E-001 |
| Bacteroidetes       | Sphingobacterium_sp._21_chromosome_NC_015277                                  | IS21        | 7  | 6  | 1  | 1,25E-001 |
| Firmicutes          | Syntrophomonas_wolfei_subsp._wolfei_str._Goettingen_chromosome_NC_008346      | IS21        | 7  | 1  | 6  | 1,25E-001 |
| Firmicutes          | Thermacetogenium_phaeum_DSM_12270_chromosome_NC_018870                        | IS21        | 7  | 6  | 1  | 1,25E-001 |
| Proteobacteria      | Gluconacetobacter_diazotrophicus_PAI_5_uid61587_chromosome_NC_010125          | IS21        | 12 | 9  | 3  | 1,46E-001 |
| Proteobacteria      | Aeromonas_salmonicida_subsp._salmonicida_A449_NC_009348                       | IS21        | 9  | 7  | 2  | 1,80E-001 |
| Proteobacteria      | Marinobacter_aquaeolei_VT8_NC_008740                                          | IS21        | 23 | 8  | 15 | 2,10E-001 |
| Proteobacteria      | Myxococcus_fulvus_HW-1_chromosome_NC_015711                                   | IS21        | 16 | 11 | 5  | 2,10E-001 |
| Firmicutes          | Clostridium_botulinum_Ba4_str._657_chromosome_NC_012658                       | IS21        | 6  | 5  | 1  | 2,19E-001 |
| Cyanobacteria       | Cyanothece_sp._PCC_7425_chromosome_NC_011884                                  | IS21        | 6  | 5  | 1  | 2,19E-001 |
| Proteobacteria      | Mesorhizobium_lotii_MAFF303099_chromosome_NC_002678                           | IS21        | 6  | 1  | 5  | 2,19E-001 |
| Proteobacteria      | Ralstonia_solanacearum_Po82_chromosome_NC_017574                              | IS21        | 6  | 5  | 1  | 2,19E-001 |
| Bacteroidetes       | Belliella_baltica_DSM_15883_chromosome_NC_018010                              | IS21        | 11 | 8  | 3  | 2,27E-001 |
| Actinobacteria      | Nakamurella_multipartita_DSM_44233_chromosome_NC_013235                       | IS21        | 11 | 3  | 8  | 2,27E-001 |
| Deferribacteres     | Denitrovibrio_acetiphilus_DSM_12809_chromosome_NC_013943                      | IS21        | 18 | 12 | 6  | 2,38E-001 |
| Proteobacteria      | Aromatoleum_aromaticum_EbN1_chromosome_NC_006513                              | IS21        | 29 | 18 | 11 | 2,65E-001 |
| Proteobacteria      | Burkholderia_xenovorans_LB400_chromosome_1_NC_007951                          | IS21        | 13 | 9  | 4  | 2,67E-001 |
| Proteobacteria      | Azospirillum_sp._B510_chromosome_NC_013854                                    | IS21        | 8  | 2  | 6  | 2,89E-001 |
| Acidobacteria       | Candidatus_Solibacter_usitatus_Ellin6076_chromosome_NC_008536                 | IS21        | 8  | 6  | 2  | 2,89E-001 |
| Proteobacteria      | Hippea_maritima_DSM_10411_chromosome_NC_015318                                | IS21        | 8  | 2  | 6  | 2,89E-001 |
| Firmicutes          | Sulfobacillus_acidophilus_DSM_10332_chromosome_NC_016884                      | IS21        | 8  | 6  | 2  | 2,89E-001 |
| Proteobacteria      | Nitrosomonas_sp._AL212_chromosome_NC_015222                                   | IS21        | 15 | 5  | 10 | 3,02E-001 |
| Firmicutes          | Clostridium_thermocellum_ATCC_27405_chromosome_NC_009012                      | IS21        | 10 | 3  | 7  | 3,44E-001 |
| Proteobacteria      | Desulfurivibrio_alkaliphilus_AHT2_chromosome_NC_014216                        | IS21        | 10 | 3  | 7  | 3,44E-001 |
| Proteobacteria      | Geobacter_lovleyi_SZ_chromosome_NC_010814                                     | IS21        | 10 | 3  | 7  | 3,44E-001 |
| Proteobacteria      | Nitrobacter_hamburgensis_X14_chromosome_NC_007964                             | IS21        | 10 | 3  | 7  | 3,44E-001 |
| Proteobacteria      | Sulfurospirillum_deleyianum_DSM_6946_chromosome_NC_013512                     | IS21        | 10 | 7  | 3  | 3,44E-001 |
| Proteobacteria      | Acidithiobacillus_calidus_SM-1_chromosome_NC_015850                           | IS21        | 12 | 8  | 4  | 3,88E-001 |
| Proteobacteria      | Bradyrhizobium_japonicum_USDA_110_chromosome_NC_004463                        | IS21        | 14 | 9  | 5  | 4,24E-001 |
| Proteobacteria      | Methylotenera_versatilis_301_chromosome_NC_014207                             | IS21        | 7  | 2  | 5  | 4,53E-001 |
| Actinobacteria      | Mycobacterium_canettii_CIPT_140010059_NC_015848                               | IS21        | 7  | 2  | 5  | 4,53E-001 |
| Firmicutes          | Clostridium_clariflavum_DSM_19732_chromosome_NC_016627                        | IS21        | 16 | 10 | 6  | 4,54E-001 |
| Firmicutes          | Desulfotomaculum_carboxydvorans_CO-1-SRB_chromosome_NC_015565                 | IS21        | 9  | 6  | 3  | 5,08E-001 |
| Proteobacteria      | Sinorhizobium_melloti_SM11_chromosome_NC_017325                               | IS21        | 9  | 3  | 6  | 5,08E-001 |
| Firmicutes          | Oscillibacter_valericigenes_Sjm18-20_NC_016048                                | IS21        | 24 | 10 | 14 | 5,41E-001 |
| Proteobacteria      | Escherichia_coli_536_NC_008253                                                | IS21        | 11 | 4  | 7  | 5,49E-001 |
| Proteobacteria      | Candidatus_Accumulibacter_phosphatis_clade_IIA_str._UW-1_chromosome_NC_013194 | IS21        | 15 | 6  | 9  | 6,07E-001 |
| Proteobacteria      | Acidiphilium_multivorum_AIU301_NC_015186                                      | IS21        | 6  | 4  | 2  | 6,88E-001 |
| Firmicutes          | Clostridium_beijerinckii_NCIMB_8052_chromosome_NC_009617                      | IS21        | 6  | 4  | 2  | 6,88E-001 |
| Proteobacteria      | Dechlorosoma_suillum_PS_chromosome_NC_016616                                  | IS21        | 6  | 2  | 4  | 6,88E-001 |
| Tenericutes         | Mycoplasma_penetrans_HF-2_NC_004432                                           | IS21        | 6  | 2  | 4  | 6,88E-001 |
| Proteobacteria      | Myxococcus_xanthus_DK_1622_chromosome_NC_008095                               | IS21        | 6  | 2  | 4  | 6,88E-001 |
| Firmicutes          | Roseburia_hominis_A2-183_chromosome_NC_015977                                 | IS21        | 6  | 4  | 2  | 6,88E-001 |
| Proteobacteria      | Yersinia_enterocolitica_subsp._palearctica_Y11_NC_017564                      | IS21        | 6  | 4  | 2  | 6,88E-001 |
| Proteobacteria      | Yersinia_pseudotuberculosis_IP_32953_chromosome_NC_006155                     | IS21        | 6  | 4  | 2  | 6,88E-001 |
| Firmicutes          | Caldicellulosiruptor_bescii_DSM_6725_chromosome_NC_012034                     | IS21        | 8  | 5  | 3  | 7,27E-001 |
| Proteobacteria      | Desulfobacula_toluolica_Tol2_NC_018645                                        | IS21        | 8  | 5  | 3  | 7,27E-001 |
| Firmicutes          | Desulfotomaculum_reducens_MI-1_chromosome_NC_009253                           | IS21        | 8  | 3  | 5  | 7,27E-001 |
| Proteobacteria      | Geobacter_metallireducens_GS-15_chromosome_NC_007517                          | IS21        | 8  | 3  | 5  | 7,27E-001 |
| Firmicutes          | Lactococcus_lactis_subsp._cremoris_MG1363_chromosome_NC_009004                | IS21        | 8  | 5  | 3  | 7,27E-001 |
| Proteobacteria      | Polymorphum_gilvum_SL003B-26A1_chromosome_NC_015259                           | IS21        | 8  | 5  | 3  | 7,27E-001 |
| Proteobacteria      | Phaeobacter_gallaeciensis_DSM_17395_chromosome_NC_018290                      | IS21        | 10 | 6  | 4  | 7,54E-001 |
| Firmicutes          | Staphylococcus_aureus_subsp._aureus_HO_5096_0412_NC_017763                    | IS21        | 10 | 6  | 4  | 7,54E-001 |
| Proteobacteria      | Pseudomonas_putida_S16_chromosome_NC_015733                                   | IS21        | 12 | 5  | 7  | 7,74E-001 |
| Firmicutes          | Symbiobacterium_thermophilum_IAM_14863_chromosome_NC_006177                   | IS21        | 12 | 7  | 5  | 7,74E-001 |
| Firmicutes          | Geobacillus_thermoglucosidasius_C56-YS93_chromosome_NC_015660                 | IS21        | 14 | 6  | 8  | 7,91E-001 |
| Proteobacteria      | Haliangium_ochraceum_DSM_14365_chromosome_NC_013440                           | IS21        | 14 | 8  | 6  | 7,91E-001 |
| Proteobacteria      | Sinorhizobium_fredii_HH103_NC_016812                                          | IS21        | 16 | 9  | 7  | 8,04E-001 |
| Bacteroidetes       | Spirosoma_linguale_DSM_74_chromosome_NC_013730                                | IS21        | 16 | 9  | 7  | 8,04E-001 |
| Proteobacteria      | Shewanella_baltica_OS117_chromosome_NC_017579                                 | IS21        | 32 | 17 | 15 | 8,60E-001 |

|                     |                                                                                    |       |    |    |    |           |
|---------------------|------------------------------------------------------------------------------------|-------|----|----|----|-----------|
| Actinobacteria      | Bifidobacterium_longum_DJO10A_chromosome_NC_010816                                 | IS21  | 10 | 5  | 5  | 1,00E+000 |
| Firmicutes          | Caldicellulosiruptor_saccharolyticus_DSM_8903_chromosome_NC_009437                 | IS21  | 10 | 5  | 5  | 1,00E+000 |
| Proteobacteria      | Comamonas_testosteroni_CNB-2_chromosome_NC_013446                                  | IS21  | 8  | 4  | 4  | 1,00E+000 |
| Firmicutes          | Desulfotomaculum_acetoxidans_DSM_771_chromosome_NC_013216                          | IS21  | 8  | 4  | 4  | 1,00E+000 |
| Firmicutes          | Geobacillus_sp._Y4.1MC1_chromosome_NC_014650                                       | IS21  | 20 | 10 | 10 | 1,00E+000 |
| Thermotogae         | Kosmotoga_olearia_TBF_19.5.1_NC_012785                                             | IS21  | 12 | 6  | 6  | 1,00E+000 |
| Firmicutes          | Mahella_australiensis_50-1_BON_chromosome_NC_015520                                | IS21  | 8  | 4  | 4  | 1,00E+000 |
| Firmicutes          | Moorella_thermoacetica_ATCC_39073_chromosome_NC_007644                             | IS21  | 6  | 3  | 3  | 1,00E+000 |
| Proteobacteria      | Pseudomonas_stutzeri_A1501_chromosome_NC_009434                                    | IS21  | 8  | 4  | 4  | 1,00E+000 |
| Proteobacteria      | Rhodopseudomonas_palustris_BisB18_chromosome_NC_007925                             | IS21  | 6  | 3  | 3  | 1,00E+000 |
| Proteobacteria      | Rickettsia_felis_URRWXCal2_chromosome_NC_007109                                    | IS21  | 6  | 3  | 3  | 1,00E+000 |
| Actinobacteria      | Saccharopolyspora_erythraea_NRR1_2338_chromosome_NC_009142                         | IS21  | 8  | 4  | 4  | 1,00E+000 |
| Firmicutes          | Thermoanaerobacterium_thermosaccharolyticum_DSM_571_chromosome_NC_014410           | IS21  | 8  | 4  | 4  | 1,00E+000 |
| Proteobacteria      | Acidovorax_sp._JS42_chromosome_NC_008782                                           | IS21  | 13 | 7  | 6  | 1,00E+000 |
| Proteobacteria      | Alicyclophilus_denitrificans_K601_chromosome_NC_015422                             | IS21  | 11 | 6  | 5  | 1,00E+000 |
| Firmicutes          | Alkaliphilus_metalliredigens_QYMF_chromosome_NC_009633                             | IS21  | 15 | 8  | 7  | 1,00E+000 |
| Proteobacteria      | Edwardsiella_tarda_EIB202_chromosome_NC_013508                                     | IS21  | 11 | 5  | 6  | 1,00E+000 |
| Firmicutes          | Ethanoligenens_harbinense_YUAN-3_chromosome_NC_014828                              | IS21  | 11 | 6  | 5  | 1,00E+000 |
| Deferribacteres     | Flexistipes_sinusarabici_DSM_4947_chromosome_NC_015672                             | IS21  | 9  | 5  | 4  | 1,00E+000 |
| Firmicutes          | Lactobacillus_reuteri_SD2112_chromosome_NC_015697                                  | IS21  | 7  | 4  | 3  | 1,00E+000 |
| Bacteroidetes       | Parabacteroides_distasonis_ATCC_8503_chromosome_NC_009615                          | IS21  | 7  | 4  | 3  | 1,00E+000 |
| Actinobacteria      | Pseudonocardia_dioxanivorans_CB1190_chromosome_NC_015312                           | IS21  | 13 | 7  | 6  | 1,00E+000 |
| Proteobacteria      | Rhodobacter_sphaeroides_ATCC_17025_chromosome_NC_009428                            | IS21  | 9  | 5  | 4  | 1,00E+000 |
| Actinobacteria      | Salinispora_arenicola_CNS-205_chromosome_NC_009953                                 | IS21  | 7  | 3  | 4  | 1,00E+000 |
| Firmicutes          | Thermosediminibacter_oceani_DSM_16646_chromosome_NC_014377                         | IS21  | 15 | 8  | 7  | 1,00E+000 |
| Proteobacteria      | Thiomonas_intermedia_K12_chromosome_NC_014153                                      | IS21  | 13 | 7  | 6  | 1,00E+000 |
| Proteobacteria      | Pseudomonas_syringae_pv._tomato_str._DC3000_chromosome_NC_004578                   | IS21  | 23 | 11 | 12 | 1,00E+000 |
| Proteobacteria      | Shigella_sonnei_53G_NC_016822                                                      | IS21  | 29 | 14 | 15 | 1,00E+000 |
| Proteobacteria      | Helicobacter_cetorum_MIT_99-5656_chromosome_NC_017735                              | IS256 | 8  | 8  | 0  | 7,81E-003 |
| Proteobacteria      | Actinobacillus_pleuropneumoniae_serovar_3_str._JL03_chromosome_NC_010278           | IS256 | 7  | 7  | 0  | 1,56E-002 |
| Firmicutes          | Thermacetogenium_phaeum_DSM_12270_chromosome_NC_018870                             | IS256 | 7  | 7  | 0  | 1,56E-002 |
| Firmicutes          | Lactobacillus_fermentum_CECT_5716_chromosome_NC_017465                             | IS256 | 27 | 20 | 7  | 1,92E-002 |
| Actinobacteria      | Corynebacterium_diphtheriae_PW8_chromosome_NC_016789                               | IS256 | 10 | 9  | 1  | 2,15E-002 |
| Proteobacteria      | Methylobacterium_populi_BJ001_chromosome_NC_010725                                 | IS256 | 13 | 11 | 2  | 2,25E-002 |
| Proteobacteria      | Rhodospirillum_rubrum_ATCC_11170_chromosome_NC_007643                              | IS256 | 6  | 6  | 0  | 3,13E-002 |
| Proteobacteria      | Rickettsia_felis_URRWXCal2_chromosome_NC_007109                                    | IS256 | 38 | 26 | 12 | 3,36E-002 |
| Spirochaetes        | Spirochaeta_africana_DSM_8902_chromosome_NC_017098                                 | IS256 | 20 | 15 | 5  | 4,14E-002 |
| Actinobacteria      | Mycobacterium_canettii_CIPT_140010059_NC_015848                                    | IS256 | 8  | 1  | 7  | 7,03E-002 |
| Proteobacteria      | Ralstonia_solanacearum_CFBP2957_chromosome_NC_014307                               | IS256 | 8  | 1  | 7  | 7,03E-002 |
| Firmicutes          | Caldicellulosiruptor_saccharolyticus_DSM_8903_chromosome_NC_009437                 | IS256 | 32 | 11 | 21 | 1,10E-001 |
| Firmicutes          | Clostridium_clariflavum_DSM_19732_chromosome_NC_016627                             | IS256 | 27 | 18 | 9  | 1,22E-001 |
| Bacteroidetes       | Capnocytophaga_canimorsus_Cc5_chromosome_NC_015846                                 | IS256 | 7  | 6  | 1  | 1,25E-001 |
| Firmicutes          | Desulfotomaculum_carboxydivorans_CO-1-SRB_chromosome_NC_015565                     | IS256 | 7  | 6  | 1  | 1,25E-001 |
| Firmicutes          | Enterococcus_faecium_DO_chromosome_NC_017960                                       | IS256 | 17 | 12 | 5  | 1,43E-001 |
| Spirochaetes        | Treponema_azotonutricium_ZAS-9_chromosome_NC_015577                                | IS256 | 12 | 3  | 9  | 1,46E-001 |
| Firmicutes          | Lactococcus_lactis_subsp._cremoris_A76_chromosome_NC_017492                        | IS256 | 40 | 15 | 25 | 1,54E-001 |
| Proteobacteria      | Rhodospirillum_photometricum_DSM_122_NC_017059                                     | IS256 | 14 | 4  | 10 | 1,80E-001 |
| Firmicutes          | Alicyclobacillus_acidocaldarius_subsp._acidocaldarius_DSM_446_chromosome_NC_013205 | IS256 | 9  | 7  | 2  | 1,80E-001 |
| Actinobacteria      | Micrococcus_luteus_NCTC_2665_NC_012803                                             | IS256 | 21 | 14 | 7  | 1,89E-001 |
| Chlamydiae          | Parachlamydia_acanthamoebae_UV7_NC_015702                                          | IS256 | 16 | 11 | 5  | 2,10E-001 |
| Proteobacteria      | Acidithiobacillus_caldis_SM-1_chromosome_NC_015850                                 | IS256 | 6  | 5  | 1  | 2,19E-001 |
| Actinobacteria      | Frankia_sp._EAN1pec_chromosome_NC_009921                                           | IS256 | 6  | 5  | 1  | 2,19E-001 |
| Firmicutes          | Paenibacillus_mucilaginosus_KNP414_chromosome_NC_015690                            | IS256 | 6  | 1  | 5  | 2,19E-001 |
| Deinococcus-Thermus | Thermus_sp._CCB_US3_UF1_chromosome_NC_017278                                       | IS256 | 13 | 9  | 4  | 2,67E-001 |
| Proteobacteria      | Pseudomonas_syringae_pv._phaseolicola_1448A_chromosome_NC_005773                   | IS256 | 53 | 31 | 22 | 2,72E-001 |
| Proteobacteria      | Yersinia_pestis_A1122_chromosome_NC_017168                                         | IS256 | 22 | 14 | 8  | 2,86E-001 |
| Firmicutes          | Alicyclobacillus_acidocaldarius_subsp._acidocaldarius_Tc-4-1_chromosome_NC_017167  | IS256 | 8  | 6  | 2  | 2,89E-001 |
| Bacteroidetes       | Bacteroides_thetaiotaomicron_VPI-5482_chromosome_NC_004663                         | IS256 | 8  | 2  | 6  | 2,89E-001 |
| Actinobacteria      | Bifidobacterium_longum_subsp._infantis_ATCC_15697_chromosome_NC_011593             | IS256 | 8  | 6  | 2  | 2,89E-001 |
| Thermotogae         | Mesotoga_prima_MesG1.Ag.4.2_chromosome_NC_017934                                   | IS256 | 8  | 6  | 2  | 2,89E-001 |
| Proteobacteria      | Thioalkalivibrio_sp._K90mix_chromosome_NC_013889                                   | IS256 | 8  | 6  | 2  | 2,89E-001 |
| Spirochaetes        | Treponema_brennaboreense_DSM_12168_chromosome_NC_015500                            | IS256 | 8  | 6  | 2  | 2,89E-001 |
| Deferribacteres     | Denitrovibrio_acetiphilus_DSM_12809_chromosome_NC_013943                           | IS256 | 17 | 6  | 11 | 3,32E-001 |
| Proteobacteria      | Burkholderia_vietnamiensis_G4_chromosome_chromosome_2_NC_009255                    | IS256 | 10 | 7  | 3  | 3,44E-001 |
| Synergistetes       | Thermovirga_lienii_DSM_17291_chromosome_NC_016148                                  | IS256 | 21 | 13 | 8  | 3,83E-001 |
| Aquificae           | Sulfurihydrogenibium_sp._YO3AOP1_chromosome_NC_010730                              | IS256 | 12 | 8  | 4  | 3,88E-001 |
| Firmicutes          | Oscillibacter_valericigenes_Sjm18-20_NC_016048                                     | IS256 | 23 | 14 | 9  | 4,05E-001 |
| Cyanobacteria       | Acaryochloris_marina_MBIC11017_chromosome_NC_009925                                | IS256 | 7  | 5  | 2  | 4,53E-001 |
| Actinobacteria      | Blastococcus_saxosidens_DD2_NC_016943                                              | IS256 | 7  | 5  | 2  | 4,53E-001 |
| Firmicutes          | Geobacillus_thermoglucosidasius_C56-YS93_chromosome_NC_015660                      | IS256 | 7  | 5  | 2  | 4,53E-001 |
| Cyanobacteria       | Gloeobacter_violaceus_PCC_7421_chromosome_NC_005125                                | IS256 | 7  | 5  | 2  | 4,53E-001 |
| Proteobacteria      | Methylobacterium_sp._4-46_chromosome_NC_010511                                     | IS256 | 7  | 5  | 2  | 4,53E-001 |
| Proteobacteria      | Ralstonia_pickettii_12D_chromosome_chromosome_1_NC_012856                          | IS256 | 7  | 2  | 5  | 4,53E-001 |
| Spirochaetes        | Treponema_primitia_ZAS-2_chromosome_NC_015578                                      | IS256 | 7  | 2  | 5  | 4,53E-001 |
| Firmicutes          | Bacillus_halodurans_C-125_chromosome_NC_002570                                     | IS256 | 9  | 6  | 3  | 5,08E-001 |
| Proteobacteria      | Burkholderia_multivorans_ATCC_17616_uid58697_chromosome_1_NC_010084                | IS256 | 9  | 3  | 6  | 5,08E-001 |
| Firmicutes          | Symbiobacterium_thermophilum_IAM_14863_chromosome_NC_006177                        | IS256 | 9  | 6  | 3  | 5,08E-001 |
| Proteobacteria      | Erwinia_pyrifoliae_DSM_12163_NC_017390                                             | IS256 | 22 | 13 | 9  | 5,23E-001 |
| Actinobacteria      | Corynebacterium_urealyticum_DSM_7109_chromosome_NC_010545                          | IS256 | 11 | 4  | 7  | 5,49E-001 |
| Proteobacteria      | Gluconacetobacter_xylinus_NBRC_3288_NC_016027                                      | IS256 | 11 | 7  | 4  | 5,49E-001 |
| Actinobacteria      | Mycobacterium_sp._KMS_chromosome_NC_008705                                         | IS256 | 11 | 4  | 7  | 5,49E-001 |
| Proteobacteria      | Myxococcus_fulvus_HW-1_chromosome_NC_015711                                        | IS256 | 11 | 7  | 4  | 5,49E-001 |
| Proteobacteria      | Edwardsiella_ictaluri_93-146_chromosome_NC_012779                                  | IS256 | 45 | 25 | 20 | 5,51E-001 |
| Firmicutes          | Clostridium_thermocellum_ATCC_27405_chromosome_NC_009012                           | IS256 | 26 | 11 | 15 | 5,57E-001 |

|                     |                                                                                             |       |    |    |    |           |
|---------------------|---------------------------------------------------------------------------------------------|-------|----|----|----|-----------|
| Actinobacteria      | Nakamurella_multipartita_DSM_44233_chromosome_NC_013235                                     | IS256 | 15 | 9  | 6  | 6,07E-001 |
| Spirochaetes        | Spirochaeta_thermophila_DSM_6192_chromosome_NC_014484                                       | IS256 | 15 | 9  | 6  | 6,07E-001 |
| Actinobacteria      | Corynebacterium_variabile_DSM_44702_chromosome_NC_015859                                    | IS256 | 19 | 8  | 11 | 6,48E-001 |
| Firmicutes          | Lactobacillus_helveticus_DPC_4571_NC_010080                                                 | IS256 | 23 | 13 | 10 | 6,78E-001 |
| Proteobacteria      | Asticcacaulis_excentricus_CB_48_chromosome_1_NC_014816                                      | IS256 | 6  | 2  | 4  | 6,88E-001 |
| Proteobacteria      | Burkholderia_rhizoxinica_HK1_454_chromosome_NC_014722                                       | IS256 | 6  | 2  | 4  | 6,88E-001 |
| Firmicutes          | Caldicellulosiruptor_kristjanssonii_177R1B_chromosome_NC_014721                             | IS256 | 6  | 4  | 2  | 6,88E-001 |
| Firmicutes          | Clostridium_kluyveri_DSM_555_chromosome_NC_009706                                           | IS256 | 6  | 2  | 4  | 6,88E-001 |
| Actinobacteria      | Corynebacterium_aurimucosum_ATCC_700975_NC_012590                                           | IS256 | 6  | 4  | 2  | 6,88E-001 |
| Proteobacteria      | Pseudomonas_fluorescens_F113_chromosome_NC_016830                                           | IS256 | 6  | 2  | 4  | 6,88E-001 |
| Proteobacteria      | Psychrobacter_cryohalolentis_K5_chromosome_NC_007969                                        | IS256 | 6  | 4  | 2  | 6,88E-001 |
| Firmicutes          | Streptococcus_macedonicus_ACA-DC_198_NC_016749                                              | IS256 | 6  | 2  | 4  | 6,88E-001 |
| Thermotogae         | Thermotoga_thermarum_DSM_5069_chromosome_NC_015707                                          | IS256 | 6  | 4  | 2  | 6,88E-001 |
| Proteobacteria      | Xanthomonas_oryzae_pv_oryzae_KACC10331_chromosome_NC_006834                                 | IS256 | 6  | 4  | 2  | 6,88E-001 |
| Proteobacteria      | Xenorhabdus_nematophila_ATCC_19061_chromosome_NC_014228                                     | IS256 | 6  | 2  | 4  | 6,88E-001 |
| Proteobacteria      | Burkholderia_thailandensis_E264_chromosome_chromosome_II_NC_007650                          | IS256 | 8  | 3  | 5  | 7,27E-001 |
| Actinobacteria      | Gordonia_polyisoprenivorans_VH2_chromosome_NC_016906                                        | IS256 | 8  | 5  | 3  | 7,27E-001 |
| Firmicutes          | Halanaerobium_hydrogeniformans_chromosome_NC_014654                                         | IS256 | 8  | 5  | 3  | 7,27E-001 |
| Tenericutes         | Mycoplasma_fermentans_M64_chromosome_NC_014921                                              | IS256 | 8  | 3  | 5  | 7,27E-001 |
| Proteobacteria      | Nitrosomonas_eutropha_C91_chromosome_NC_008344                                              | IS256 | 8  | 5  | 3  | 7,27E-001 |
| Actinobacteria      | Saccharopolyspora_erythraea_NRRL_2338_chromosome_NC_009142                                  | IS256 | 8  | 5  | 3  | 7,27E-001 |
| Bacteroidetes       | Saprospira_grandis_str._Lewin_chromosome_NC_016940                                          | IS256 | 8  | 5  | 3  | 7,27E-001 |
| Proteobacteria      | Yersinia_enterocolitica_subsp._paleartica_105.5R(r)_chromosome_NC_015224                    | IS256 | 8  | 3  | 5  | 7,27E-001 |
| Bacteroidetes       | Belliella_baltica_DSM_15883_chromosome_NC_018010                                            | IS256 | 10 | 6  | 4  | 7,54E-001 |
| Actinobacteria      | Mycobacterium_gilvum_PYR-GCK_chromosome_NC_009338                                           | IS256 | 10 | 6  | 4  | 7,54E-001 |
| Proteobacteria      | Shewanella_oneidensis_MR-1_chromosome_NC_004347                                             | IS256 | 45 | 21 | 24 | 7,66E-001 |
| Firmicutes          | Clostridium_sp._SY8519_NC_015737                                                            | IS256 | 12 | 5  | 7  | 7,74E-001 |
| Proteobacteria      | Geobacter_uraniireducens_Rf4_chromosome_NC_009483                                           | IS256 | 12 | 5  | 7  | 7,74E-001 |
| Proteobacteria      | Acidiphilium_multivorum_AIU301_NC_015186                                                    | IS256 | 14 | 6  | 8  | 7,91E-001 |
| Firmicutes          | Staphylococcus_haemolyticus_JCSC1435_chromosome_NC_007168                                   | IS256 | 14 | 8  | 6  | 7,91E-001 |
| Actinobacteria      | Mycobacterium_ulcerans_Agy99_chromosome_NC_008611                                           | IS256 | 71 | 37 | 34 | 8,13E-001 |
| Chlamydiae          | Waddlia_chondrophila_WSU_86-1044_chromosome_NC_014225                                       | IS256 | 18 | 10 | 8  | 8,15E-001 |
| Chloroflexi         | Dehalogenimonas_lykanthroporepellens_BL-DC-9_chromosome_NC_014314                           | IS256 | 24 | 13 | 11 | 8,39E-001 |
| Proteobacteria      | Burkholderia_gladioli_BSR3_chromosome_chromosome_1_NC_015381                                | IS256 | 8  | 4  | 4  | 1,00E+000 |
| Deferribacteres     | Calditerrivibrio_nitroreducens_DSM_19672_chromosome_NC_014758                               | IS256 | 8  | 4  | 4  | 1,00E+000 |
| Proteobacteria      | Cupriavidus_necator_N-1_chromosome_chromosome_2_NC_015723                                   | IS256 | 6  | 3  | 3  | 1,00E+000 |
| Actinobacteria      | Mycobacterium_rhodesiae_NBB3_chromosome_NC_016604                                           | IS256 | 6  | 3  | 3  | 1,00E+000 |
| Actinobacteria      | Mycobacterium_tuberculosis_CCDC5079_chromosome_NC_017523                                    | IS256 | 10 | 5  | 5  | 1,00E+000 |
| Firmicutes          | Pelotomaculum_thermopropionicum_SI_chromosome_NC_009454                                     | IS256 | 10 | 5  | 5  | 1,00E+000 |
| Actinobacteria      | Rhodococcus_jostii_RHA1_chromosome_NC_008268                                                | IS256 | 6  | 3  | 3  | 1,00E+000 |
| Proteobacteria      | Sinorhizobium_meliloti_1021_NC_003047                                                       | IS256 | 12 | 6  | 6  | 1,00E+000 |
| Proteobacteria      | Syntrophus_aciditrophicus_SB_chromosome_NC_007759                                           | IS256 | 10 | 5  | 5  | 1,00E+000 |
| Proteobacteria      | Acidiphilium_cryptum_JF-5_chromosome_NC_009484                                              | IS256 | 7  | 4  | 3  | 1,00E+000 |
| Proteobacteria      | Burkholderia_thailandensis_E264_chromosome_chromosome_I_NC_007651                           | IS256 | 15 | 7  | 8  | 1,00E+000 |
| Proteobacteria      | Burkholderia_vietnamiensis_G4_chromosome_chromosome_1_NC_009256                             | IS256 | 9  | 5  | 4  | 1,00E+000 |
| Actinobacteria      | Corynebacterium_efficiens_YS-314_chromosome_NC_004369                                       | IS256 | 15 | 7  | 8  | 1,00E+000 |
| Proteobacteria      | Desulfurivibrio_alkaliphilus_AHT2_chromosome_NC_014216                                      | IS256 | 9  | 5  | 4  | 1,00E+000 |
| Actinobacteria      | Eggerthella_lenta_DSM_2243_chromosome_NC_013204                                             | IS256 | 15 | 8  | 7  | 1,00E+000 |
| Firmicutes          | Enterococcus_faecalis_62_chromosome_NC_017312                                               | IS256 | 9  | 4  | 5  | 1,00E+000 |
| Proteobacteria      | Escherichia_coli_ETEC_H10407_NC_017633                                                      | IS256 | 7  | 4  | 3  | 1,00E+000 |
| Proteobacteria      | Gallibacterium_anatis_UMN179_chromosome_NC_015460                                           | IS256 | 9  | 4  | 5  | 1,00E+000 |
| Firmicutes          | Geobacillus_sp._WCH70_chromosome_NC_012793                                                  | IS256 | 15 | 8  | 7  | 1,00E+000 |
| Firmicutes          | Geobacillus_thermoleovorans_CCB_US3_UF5_chromosome_NC_016593                                | IS256 | 9  | 5  | 4  | 1,00E+000 |
| Proteobacteria      | Gluconacetobacter_diazotrophicus_PAI_5_uid59075_chromosome_NC_011365                        | IS256 | 7  | 3  | 4  | 1,00E+000 |
| Proteobacteria      | Hippea_maritima_DSM_10411_chromosome_NC_015318                                              | IS256 | 9  | 5  | 4  | 1,00E+000 |
| Thermotogae         | Kosmotoga_olearia_TBF_19.5.1_NC_012785                                                      | IS256 | 7  | 4  | 3  | 1,00E+000 |
| Actinobacteria      | Kytococcus_sedentarius_DSM_20547_chromosome_NC_013169                                       | IS256 | 15 | 8  | 7  | 1,00E+000 |
| Firmicutes          | Lactobacillus_crispatus_ST1_NC_014106                                                       | IS256 | 9  | 5  | 4  | 1,00E+000 |
| Firmicutes          | Lactobacillus_delbrueckii_subsp._bulgaricus_ND02_chromosome_NC_014727                       | IS256 | 7  | 3  | 4  | 1,00E+000 |
| Firmicutes          | Lactobacillus_ruminis_ATCC_27782_chromosome_NC_015975                                       | IS256 | 7  | 3  | 4  | 1,00E+000 |
| Deinococcus-Thermus | Meiothermus_silvanus_DSM_9946_chromosome_NC_014212                                          | IS256 | 15 | 8  | 7  | 1,00E+000 |
| Actinobacteria      | Mycobacterium_africanum_GM041182_chromosome_NC_015758                                       | IS256 | 9  | 5  | 4  | 1,00E+000 |
| Actinobacteria      | Mycobacterium_bovis_AF2122/97_chromosome_NC_002945                                          | IS256 | 9  | 5  | 4  | 1,00E+000 |
| Actinobacteria      | Mycobacterium_vanbaalenii_PYR-1_chromosome_NC_008726                                        | IS256 | 13 | 7  | 6  | 1,00E+000 |
| Tenericutes         | Mycoplasma_gallisepticum_NC06_2006.080-5-2P_chromosome_NC_018411                            | IS256 | 13 | 7  | 6  | 1,00E+000 |
| Proteobacteria      | Nitrosococcus_halophilus_Nc4_chromosome_NC_013960                                           | IS256 | 13 | 6  | 7  | 1,00E+000 |
| Actinobacteria      | Pseudonocardia_dioxanivorans_CB1190_chromosome_NC_015312                                    | IS256 | 7  | 4  | 3  | 1,00E+000 |
| Proteobacteria      | Salmonella_enterica_subsp._enterica_serovar_Paratyphi_C_strain_RKS4594_chromosome_NC_015312 | IS256 | 7  | 3  | 4  | 1,00E+000 |
| Proteobacteria      | Sinorhizobium_fredii_USDA_257_chromosome_NC_018000                                          | IS256 | 11 | 6  | 5  | 1,00E+000 |
| Firmicutes          | Streptococcus_thermophilus_CNRZ1066_chromosome_NC_006449                                    | IS256 | 11 | 5  | 6  | 1,00E+000 |
| Actinobacteria      | Streptomyces_violaceusniger_Tu_4113_chromosome_NC_015957                                    | IS256 | 11 | 6  | 5  | 1,00E+000 |
| Firmicutes          | Sulfobacillus_acidophilus_DSM_10332_chromosome_NC_016884                                    | IS256 | 15 | 7  | 8  | 1,00E+000 |
| Proteobacteria      | Sulfurospirillum_barnesii_SES-3_chromosome_NC_018002                                        | IS256 | 7  | 4  | 3  | 1,00E+000 |
| Proteobacteria      | Yersinia_pseudotuberculosis_IP_32953_chromosome_NC_006155                                   | IS256 | 7  | 4  | 3  | 1,00E+000 |
| Firmicutes          | Staphylococcus_aureus_subsp._aureus_T0131_chromosome_NC_017347                              | IS256 | 21 | 11 | 10 | 1,00E+000 |
| Actinobacteria      | Corynebacterium_jeikeium_K411_chromosome_NC_007164                                          | IS256 | 23 | 12 | 11 | 1,00E+000 |
| Actinobacteria      | Mycobacterium_avium_104_NC_008595                                                           | IS256 | 69 | 34 | 35 | 1,00E+000 |
| Firmicutes          | Lactococcus_garvieae_Lg2_NC_017490                                                          | IS3   | 11 | 0  | 11 | 9,77E-004 |
| Proteobacteria      | Acidithiobacillus_ferrivorans_SS3_chromosome_NC_015942                                      | IS3   | 9  | 9  | 0  | 3,91E-003 |
| Proteobacteria      | Actinobacillus_pleuropneumoniae_serovar_7_str._AP76_NC_010939                               | IS3   | 12 | 1  | 11 | 6,35E-003 |
| Synergistetes       | Thermovirga_lienii_DSM_17291_chromosome_NC_016148                                           | IS3   | 18 | 3  | 15 | 7,54E-003 |
| Firmicutes          | Streptococcus_pyogenes_MGAS2096_chromosome_NC_008023                                        | IS3   | 8  | 0  | 8  | 7,81E-003 |
| Firmicutes          | Acidaminococcus_fermentans_DSM_20731_chromosome_NC_013740                                   | IS3   | 7  | 0  | 7  | 1,56E-002 |
| Actinobacteria      | Frankia_sp._EAN1pec_chromosome_NC_009921                                                    | IS3   | 37 | 11 | 26 | 2,01E-002 |



|                     |                                                                                   |     |    |    |    |           |
|---------------------|-----------------------------------------------------------------------------------|-----|----|----|----|-----------|
| Actinobacteria      | Mycobacterium_tuberculosis_RGTB327_chromosome_NC_017026                           | IS3 | 16 | 3  | 13 | 2,13E-002 |
| Firmicutes          | Clostridium_cellulovorans_743B_chromosome_NC_014393                               | IS3 | 6  | 0  | 6  | 3,13E-002 |
| Proteobacteria      | Escherichia_coli_NA114_chromosome_NC_017644                                       | IS3 | 6  | 6  | 0  | 3,13E-002 |
| Proteobacteria      | Pseudomonas_putida_ND6_chromosome_NC_017986                                       | IS3 | 6  | 6  | 0  | 3,13E-002 |
| Proteobacteria      | Shewanella_sediminis_HAW-EB3_chromosome_NC_009831                                 | IS3 | 6  | 0  | 6  | 3,13E-002 |
| Firmicutes          | Syntrophomonas_wolfei_subsp._wolfei_str._Goettingen_chromosome_NC_008346          | IS3 | 6  | 6  | 0  | 3,13E-002 |
| Firmicutes          | Ammonifex_degensii_KC4_chromosome_NC_013385                                       | IS3 | 15 | 3  | 12 | 3,52E-002 |
| Actinobacteria      | Corynebacterium_diphtheriae_BH8_chromosome_NC_016800                              | IS3 | 15 | 12 | 3  | 3,52E-002 |
| Proteobacteria      | Burkholderia_mallei_SAVP1_chromosome_II_NC_008784                                 | IS3 | 25 | 7  | 18 | 4,33E-002 |
| Proteobacteria      | Burkholderia_pseudomallei_1026b_chromosome_2_NC_017832                            | IS3 | 14 | 11 | 3  | 5,74E-002 |
| Firmicutes          | Streptococcus_macedonicus_ACA-DC_198_NC_016749                                    | IS3 | 14 | 11 | 3  | 5,74E-002 |
| Proteobacteria      | Vibrio_harveyi_ATCC_BAA-1116_chromosome_chromosome_I_NC_009783                    | IS3 | 14 | 11 | 3  | 5,74E-002 |
| Proteobacteria      | Nitrosomonas_sp._AL212_chromosome_NC_015222                                       | IS3 | 24 | 17 | 7  | 6,39E-002 |
| Proteobacteria      | Legionella_pneumophila_str._Lens_NC_006369                                        | IS3 | 8  | 7  | 1  | 7,03E-002 |
| Firmicutes          | Clostridium_lentocellum_DSM_5427_chromosome_NC_015275                             | IS3 | 13 | 3  | 10 | 9,23E-002 |
| Actinobacteria      | Gordonia_bronchialis_DSM_43247_chromosome_NC_013441                               | IS3 | 18 | 13 | 5  | 9,63E-002 |
| Firmicutes          | Clostridium_clariflavum_DSM_19732_chromosome_NC_016627                            | IS3 | 10 | 8  | 2  | 1,09E-001 |
| Proteobacteria      | Rahnella_aquatilis_CIP_78.65_=_ATCC_33071_chromosome_NC_016818                    | IS3 | 10 | 8  | 2  | 1,09E-001 |
| Actinobacteria      | Mycobacterium_canettii_CIPT_140010059_NC_015848                                   | IS3 | 15 | 4  | 11 | 1,18E-001 |
| Spirochaetes        | Spirochaeta_thermophila_DSM_6578_chromosome_NC_017583                             | IS3 | 15 | 11 | 4  | 1,18E-001 |
| Firmicutes          | Kyrpidia_tusciae_DSM_2912_chromosome_NC_014098                                    | IS3 | 7  | 1  | 6  | 1,25E-001 |
| Actinobacteria      | Mycobacterium_intracellulare_MOTT-02_chromosome_NC_016947                         | IS3 | 7  | 1  | 6  | 1,25E-001 |
| Firmicutes          | Streptococcus_galloyticus_subsp._galloyticus_ATCC_BAA-2069_NC_015215              | IS3 | 7  | 6  | 1  | 1,25E-001 |
| Proteobacteria      | Verminephrobacter_eiseniae_EF01-2_chromosome_NC_008786                            | IS3 | 7  | 6  | 1  | 1,25E-001 |
| Proteobacteria      | Nitrobacter_winogradskyi_Nb-255_chromosome_NC_007406                              | IS3 | 35 | 22 | 13 | 1,75E-001 |
| Bacteroidetes       | Belliella_baltica_DSM_15883_chromosome_NC_018010                                  | IS3 | 14 | 10 | 4  | 1,80E-001 |
| Proteobacteria      | Burkholderia_gladioli_BSR3_chromosome_chromosome_1_NC_015381                      | IS3 | 14 | 4  | 10 | 1,80E-001 |
| Bacteroidetes       | Saprospira_grandis_str._Lewin_chromosome_NC_016940                                | IS3 | 14 | 10 | 4  | 1,80E-001 |
| Proteobacteria      | Methylobacterium_chloromethanicum_CM4_chromosome_NC_011757                        | IS3 | 9  | 2  | 7  | 1,80E-001 |
| Firmicutes          | Natranaerobius_thermophilus_JW/NM-WN-LF_chromosome_NC_010718                      | IS3 | 9  | 2  | 7  | 1,80E-001 |
| Firmicutes          | Selenomonas_ruminantium_subsp._lactilytica_TAM6421_NC_017068                      | IS3 | 9  | 7  | 2  | 1,80E-001 |
| Proteobacteria      | Shigella_flexneri_2002017_chromosome_NC_017328                                    | IS3 | 96 | 55 | 41 | 1,84E-001 |
| Proteobacteria      | Xanthomonas_axonopodis_pv._citri_str._306_chromosome_NC_003919                    | IS3 | 28 | 10 | 18 | 1,85E-001 |
| Firmicutes          | Aerococcus_urinae_ACS-120-V-Col10a_chromosome_NC_015278                           | IS3 | 21 | 14 | 7  | 1,89E-001 |
| Proteobacteria      | Magnetococcus_sp._MC-1_chromosome_NC_008576                                       | IS3 | 21 | 7  | 14 | 1,89E-001 |
| Proteobacteria      | Erwinia_sp._Ejp617_chromosome_NC_017445                                           | IS3 | 23 | 15 | 8  | 2,10E-001 |
| Actinobacteria      | Propionibacterium_freudenreichii_subsp._shermanii_CIRM-BIA1_chromosome_NC_014215  | IS3 | 23 | 15 | 8  | 2,10E-001 |
| Firmicutes          | Lactococcus_lactis_subsp._cremoris_A76_chromosome_NC_017492                       | IS3 | 52 | 31 | 21 | 2,12E-001 |
| Proteobacteria      | Alteromonas_sp._SN2_chromosome_NC_015554                                          | IS3 | 6  | 5  | 1  | 2,19E-001 |
| Firmicutes          | Clostridium_difficile_BI1_NC_017179                                               | IS3 | 6  | 5  | 1  | 2,19E-001 |
| Proteobacteria      | Geobacter_lovleyi_SZ_chromosome_NC_010814                                         | IS3 | 6  | 1  | 5  | 2,19E-001 |
| Bacteroidetes       | Gramella_forsetii_KT0803_chromosome_NC_008571                                     | IS3 | 6  | 5  | 1  | 2,19E-001 |
| Actinobacteria      | Kitasatospora_setae_KM-6054_NC_016109                                             | IS3 | 6  | 5  | 1  | 2,19E-001 |
| Actinobacteria      | Mycobacterium_africanum_GM041182_chromosome_NC_015758                             | IS3 | 6  | 5  | 1  | 2,19E-001 |
| Proteobacteria      | Rhizobium_leguminosarum_bv._trifolii_WSM1325_chromosome_NC_012850                 | IS3 | 6  | 5  | 1  | 2,19E-001 |
| Proteobacteria      | Rhodopseudomonas_palustris_TIE-1_chromosome_NC_011004                             | IS3 | 6  | 1  | 5  | 2,19E-001 |
| Chlorobi            | Prosthecochloris_aestuarii_DSM_271_chromosome_NC_011059                           | IS3 | 11 | 3  | 8  | 2,27E-001 |
| Bacteroidetes       | Spirosoma_linguale_DSM_74_chromosome_NC_013730                                    | IS3 | 11 | 3  | 8  | 2,27E-001 |
| Proteobacteria      | Aeromonas_salmonicida_subsp._salmonicida_A449_NC_009348                           | IS3 | 18 | 12 | 6  | 2,38E-001 |
| Firmicutes          | Paenibacillus_mucilaginosus_3016_chromosome_NC_016935                             | IS3 | 18 | 12 | 6  | 2,38E-001 |
| Actinobacteria      | Corynebacterium_efficiens_YS-314_chromosome_NC_004369                             | IS3 | 20 | 7  | 13 | 2,63E-001 |
| Proteobacteria      | Magnetospirillum_magneticum_AMB-1_chromosome_NC_007626                            | IS3 | 20 | 7  | 13 | 2,63E-001 |
| Proteobacteria      | Burkholderia_rhizoxinica_HK1_454_chromosome_NC_014722                             | IS3 | 13 | 4  | 9  | 2,67E-001 |
| Firmicutes          | Bacillus_pseudofirmus_OF4_chromosome_NC_013791                                    | IS3 | 8  | 6  | 2  | 2,89E-001 |
| Firmicutes          | Bacillus_selenitireducens_MLS10_chromosome_NC_014219                              | IS3 | 8  | 6  | 2  | 2,89E-001 |
| Firmicutes          | Clostridium_botulinum_Ba4_str._657_chromosome_NC_012658                           | IS3 | 8  | 2  | 6  | 2,89E-001 |
| Proteobacteria      | Colwellia_psychrerythraea_34H_chromosome_NC_003910                                | IS3 | 8  | 6  | 2  | 2,89E-001 |
| Proteobacteria      | Desulfarculus_baarsii_DSM_2075_chromosome_NC_014365                               | IS3 | 8  | 2  | 6  | 2,89E-001 |
| Firmicutes          | Lactobacillus_sakei_subsp._sakei_23K_chromosome_NC_007576                         | IS3 | 8  | 2  | 6  | 2,89E-001 |
| Firmicutes          | Thermacetogenium_phaeum_DSM_12270_chromosome_NC_018870                            | IS3 | 8  | 2  | 6  | 2,89E-001 |
| Firmicutes          | Streptococcus_infantarius_subsp._infantarius_CJ18_chromosome_NC_016826            | IS3 | 15 | 10 | 5  | 3,02E-001 |
| Actinobacteria      | Mycobacterium_gilvum_PYR-GCK_chromosome_NC_009338                                 | IS3 | 24 | 15 | 9  | 3,07E-001 |
| Actinobacteria      | Mycobacterium_vanbaalenii_PYR-1_chromosome_NC_008726                              | IS3 | 17 | 11 | 6  | 3,32E-001 |
| Firmicutes          | Alicyclobacillus_acidocaldarius_subsp._acidocaldarius_Tc-4-1_chromosome_NC_017167 | IS3 | 10 | 3  | 7  | 3,44E-001 |
| Proteobacteria      | Alteromonas_macleodii_str._'Black_Sea_11'_chromosome_NC_018692                    | IS3 | 10 | 7  | 3  | 3,44E-001 |
| Actinobacteria      | Bifidobacterium_longum_subsp._longum_JDM301_chromosome_NC_014169                  | IS3 | 10 | 7  | 3  | 3,44E-001 |
| Actinobacteria      | Corynebacterium_urealyticum_DSM_7109_chromosome_NC_010545                         | IS3 | 10 | 7  | 3  | 3,44E-001 |
| Proteobacteria      | Sinorhizobium_meliloti_1021_NC_003047                                             | IS3 | 10 | 7  | 3  | 3,44E-001 |
| Deinococcus-Thermus | Meiothermus_silvanus_DSM_9946_chromosome_NC_014212                                | IS3 | 58 | 33 | 25 | 3,58E-001 |
| Chloroflexi         | Dehalogenimonas_lykanthroporepellens_BL-DC-9_chromosome_NC_014314                 | IS3 | 12 | 8  | 4  | 3,88E-001 |
| Proteobacteria      | Escherichia_blatiae_DSM_4481_chromosome_NC_017910                                 | IS3 | 12 | 4  | 8  | 3,88E-001 |
| Proteobacteria      | Pelobacter_carbinolicus_DSM_2380_chromosome_NC_007498                             | IS3 | 12 | 4  | 8  | 3,88E-001 |
| Firmicutes          | Streptococcus_dysgalactiae_subsp._equisimilis_ATCC_12394_chromosome_NC_017567     | IS3 | 12 | 4  | 8  | 3,88E-001 |
| Actinobacteria      | Streptomyces_hygroscopicus_subsp._jinggansensis_5008_chromosome_NC_017765         | IS3 | 12 | 4  | 8  | 3,88E-001 |
| Proteobacteria      | Bradyrhizobium_sp._BTAi1_chromosome_NC_009485                                     | IS3 | 14 | 9  | 5  | 4,24E-001 |
| Bacteroidetes       | Chitinophaga_pinensis_DSM_2588_chromosome_NC_013132                               | IS3 | 14 | 5  | 9  | 4,24E-001 |
| Proteobacteria      | Pseudomonas_syringae_pv._syringae_B728a_chromosome_NC_007005                      | IS3 | 14 | 5  | 9  | 4,24E-001 |
| Proteobacteria      | Acinetobacter_sp._ADP1_chromosome_NC_005966                                       | IS3 | 7  | 2  | 5  | 4,53E-001 |
| Proteobacteria      | Aeromonas_veronii_B565_chromosome_NC_015424                                       | IS3 | 7  | 2  | 5  | 4,53E-001 |
| Firmicutes          | Alkaliphilus_oremlandii_OhILAs_chromosome_NC_009922                               | IS3 | 7  | 5  | 2  | 4,53E-001 |
| Firmicutes          | Anoxybacillus_flavithermus_WK1_chromosome_NC_011567                               | IS3 | 7  | 2  | 5  | 4,53E-001 |
| Firmicutes          | Bacillus_cytotoxicus_NVH_391-98_chromosome_NC_009674                              | IS3 | 7  | 2  | 5  | 4,53E-001 |
| Chlorobi            | Chlorobium_limicola_DSM_245_chromosome_NC_010803                                  | IS3 | 7  | 5  | 2  | 4,53E-001 |
| Proteobacteria      | Comamonas_testosteroni_CNB-2_chromosome_NC_013446                                 | IS3 | 7  | 5  | 2  | 4,53E-001 |

|                 |                                                                                       |     |     |    |    |           |
|-----------------|---------------------------------------------------------------------------------------|-----|-----|----|----|-----------|
| Proteobacteria  | Cupriavidus_metallidurans_CH34_chromosome_NC_007973                                   | IS3 | 7   | 5  | 2  | 4,53E-001 |
| Firmicutes      | Desulfotobacterium_hafniense_Y51_NC_007907                                            | IS3 | 7   | 5  | 2  | 4,53E-001 |
| Proteobacteria  | Geobacter_sulfurreducens_KN400_chromosome_NC_017454                                   | IS3 | 7   | 5  | 2  | 4,53E-001 |
| Proteobacteria  | Laribacter_hongkongensis_HLHK9_NC_012559                                              | IS3 | 7   | 2  | 5  | 4,53E-001 |
| Proteobacteria  | Methylobacterium_radiotolerans_JCM_2831_chromosome_NC_010505                          | IS3 | 7   | 2  | 5  | 4,53E-001 |
| Verrucomicrobia | Opitutus_terrae_PB90-1_chromosome_NC_010571                                           | IS3 | 7   | 5  | 2  | 4,53E-001 |
| Proteobacteria  | Phenylobacterium_zucineum_HLK1_chromosome_NC_011144                                   | IS3 | 7   | 2  | 5  | 4,53E-001 |
| Proteobacteria  | Photorhabdus_asymbiotica_subsp._asymbiotica_ATCC_43949_chromosome_NC_012962           | IS3 | 7   | 5  | 2  | 4,53E-001 |
| Proteobacteria  | Pseudomonas_stutzeri_ATCC_17588 = LMG_11199_chromosome_NC_015740                      | IS3 | 7   | 5  | 2  | 4,53E-001 |
| Proteobacteria  | Shewanella_baltica_BA175_chromosome_NC_017571                                         | IS3 | 7   | 2  | 5  | 4,53E-001 |
| Proteobacteria  | Bradyrhizobium_japonicum_USDA_110_chromosome_NC_004463                                | IS3 | 16  | 6  | 10 | 4,54E-001 |
| Proteobacteria  | Xenorhabdus_nematophila_ATCC_19061_chromosome_NC_014228                               | IS3 | 16  | 10 | 6  | 4,54E-001 |
| Proteobacteria  | Candidatus_Accumulibacter_phosphatis_clade_IIA_str._UW-1_chromosome_NC_013194         | IS3 | 18  | 7  | 11 | 4,81E-001 |
| Proteobacteria  | Desulfovibrio_aespoensis_Aspo-2_chromosome_NC_014844                                  | IS3 | 18  | 11 | 7  | 4,81E-001 |
| Proteobacteria  | Psychrobacter_sp._PRwf-1_chromosome_NC_009524                                         | IS3 | 18  | 11 | 7  | 4,81E-001 |
| Firmicutes      | Sulfobacillus_acidophilus_DSM_10332_chromosome_NC_016884                              | IS3 | 18  | 7  | 11 | 4,81E-001 |
| Proteobacteria  | Methylobacterium_extorquens_DM4_NC_012988                                             | IS3 | 20  | 12 | 8  | 5,03E-001 |
| Actinobacteria  | Streptomyces_violaceusniger_Tu_4113_chromosome_NC_015957                              | IS3 | 20  | 8  | 12 | 5,03E-001 |
| Proteobacteria  | Xanthomonas_albilineans_GPE_PC73_chromosome_NC_013722                                 | IS3 | 20  | 12 | 8  | 5,03E-001 |
| Firmicutes      | Bacillus_licheniformis_ATCC_14580_chromosome_NC_006270                                | IS3 | 9   | 3  | 6  | 5,08E-001 |
| Firmicutes      | Bacillus_subtilis_subsp._spizizenii_str._W23_chromosome_NC_014479                     | IS3 | 9   | 6  | 3  | 5,08E-001 |
| Proteobacteria  | Geobacter_bemidjensis_Bem_chromosome_NC_011146                                        | IS3 | 9   | 6  | 3  | 5,08E-001 |
| Proteobacteria  | Myxococcus_xanthus_DK_1622_chromosome_NC_008095                                       | IS3 | 9   | 3  | 6  | 5,08E-001 |
| Proteobacteria  | Psychrobacter_cryohalolentis_K5_chromosome_NC_007969                                  | IS3 | 9   | 6  | 3  | 5,08E-001 |
| Firmicutes      | Thermosediminibacter_oceani_DSM_16646_chromosome_NC_014377                            | IS3 | 9   | 3  | 6  | 5,08E-001 |
| Proteobacteria  | Shigella_dysenteriae_Sd197_NC_007606                                                  | IS3 | 85  | 46 | 39 | 5,15E-001 |
| Proteobacteria  | Enterobacter_cloacae_subsp._cloacae_ATCC_13047_chromosome_NC_014121                   | IS3 | 39  | 17 | 22 | 5,22E-001 |
| Actinobacteria  | Nakamurella_multipartita_DSM_44233_chromosome_NC_013235                               | IS3 | 24  | 14 | 10 | 5,41E-001 |
| Actinobacteria  | Amycolatopsis_mediterranei_S699_chromosome_uid158689_NC_017186                        | IS3 | 11  | 7  | 4  | 5,49E-001 |
| Proteobacteria  | Psychrobacter_arcticus_273-4_chromosome_NC_007204                                     | IS3 | 11  | 4  | 7  | 5,49E-001 |
| Planctomycetes  | Rhodopirellula_baltica_SH_1_chromosome_NC_005027                                      | IS3 | 11  | 7  | 4  | 5,49E-001 |
| Proteobacteria  | Nitrospira_multiformis_ATCC_25196_chromosome_NC_007614                                | IS3 | 26  | 15 | 11 | 5,57E-001 |
| Thermotogae     | Thermosipho_africanus_TCF52B_NC_011653                                                | IS3 | 26  | 15 | 11 | 5,57E-001 |
| Firmicutes      | Streptococcus_equi_subsp._equi_4047_NC_012471                                         | IS3 | 47  | 21 | 26 | 5,60E-001 |
| Proteobacteria  | Acidovorax_citrulli_AAC00-1_chromosome_NC_008752                                      | IS3 | 13  | 5  | 8  | 5,81E-001 |
| Firmicutes      | Oscillibacter_valericigenes_Sjm18-20_NC_016048                                        | IS3 | 53  | 24 | 29 | 5,83E-001 |
| Firmicutes      | Lactobacillus_fermentum_CECT_5716_chromosome_NC_017465                                | IS3 | 15  | 6  | 9  | 6,07E-001 |
| Acidobacteria   | Candidatus_Solibacter_usitatus_Ellin6076_chromosome_NC_008536                         | IS3 | 34  | 19 | 15 | 6,08E-001 |
| Actinobacteria  | Frankia_symbiont_of_Datisca_glomerata_chromosome_NC_015656                            | IS3 | 63  | 29 | 34 | 6,15E-001 |
| Proteobacteria  | Shigella_sonnei_Ss046_chromosome_NC_007384                                            | IS3 | 104 | 55 | 49 | 6,24E-001 |
| Aquificae       | Desulfurobacterium_thermolithotrophum_DSM_11699_chromosome_NC_015185                  | IS3 | 17  | 10 | 7  | 6,29E-001 |
| Tenericutes     | Mycoplasma_mycooides_subsp._capri_LC_str._95010_NC_015431                             | IS3 | 17  | 10 | 7  | 6,29E-001 |
| Proteobacteria  | Polymorphum_gilvum_SL003B-26A1_chromosome_NC_015259                                   | IS3 | 17  | 10 | 7  | 6,29E-001 |
| Actinobacteria  | Acidimicrobium_ferroxidans_DSM_10331_chromosome_NC_013124                             | IS3 | 19  | 8  | 11 | 6,48E-001 |
| Firmicutes      | Streptococcus_thermophilus_MN-ZLW-002_chromosome_NC_017927                            | IS3 | 19  | 11 | 8  | 6,48E-001 |
| Proteobacteria  | Bordetella_petrij_DSM_12804_chromosome_NC_010170                                      | IS3 | 44  | 20 | 24 | 6,52E-001 |
| Proteobacteria  | Xanthomonas_oryzae_pv._oryzae_PXO99A_chromosome_NC_010717                             | IS3 | 50  | 27 | 23 | 6,72E-001 |
| Proteobacteria  | Acidovorax_ebreus_TPSY_chromosome_NC_011992                                           | IS3 | 6   | 4  | 2  | 6,88E-001 |
| Proteobacteria  | Aromatoleum_aromaticum_EbN1_chromosome_NC_006513                                      | IS3 | 6   | 2  | 4  | 6,88E-001 |
| Firmicutes      | Brevibacillus_brevis_NBRC_100599_NC_012491                                            | IS3 | 6   | 2  | 4  | 6,88E-001 |
| Proteobacteria  | Burkholderia_multivorans_ATCC_17616_uid58697_chromosome_3_NC_010087                   | IS3 | 6   | 4  | 2  | 6,88E-001 |
| Firmicutes      | Caldicellulosiruptor_kristjanssonii_177R1B_chromosome_NC_014721                       | IS3 | 6   | 2  | 4  | 6,88E-001 |
| Firmicutes      | Caldicellulosiruptor_lactoaceticus_6A_chromosome_NC_015949                            | IS3 | 6   | 2  | 4  | 6,88E-001 |
| Proteobacteria  | Desulfovibrio_desulfuricans_subsp._desulfuricans_str._ATCC_27774_chromosome_NC_011883 | IS3 | 6   | 4  | 2  | 6,88E-001 |
| Proteobacteria  | Enterobacter_aerogenes_KCTC_2190_chromosome_NC_015663                                 | IS3 | 6   | 2  | 4  | 6,88E-001 |
| Bacteroidetes   | Flavobacterium_columnare_ATCC_49512_chromosome_NC_016510                              | IS3 | 6   | 4  | 2  | 6,88E-001 |
| Actinobacteria  | Gordonia_polyisoprenivorans_VH2_chromosome_NC_016906                                  | IS3 | 6   | 4  | 2  | 6,88E-001 |
| Firmicutes      | Heliobacterium_modesticaldum_lce1_chromosome_NC_010337                                | IS3 | 6   | 4  | 2  | 6,88E-001 |
| Thermotogae     | Kosmotoga_olearia_TBF_19.5.1_NC_012785                                                | IS3 | 6   | 2  | 4  | 6,88E-001 |
| Firmicutes      | Lactobacillus_helveticus_DPC_4571_NC_010080                                           | IS3 | 6   | 2  | 4  | 6,88E-001 |
| Firmicutes      | Lysinibacillus_sphaericus_C3-41_chromosome_NC_010382                                  | IS3 | 6   | 2  | 4  | 6,88E-001 |
| Proteobacteria  | Mesorhizobium_lotii_MAFF303099_chromosome_NC_002678                                   | IS3 | 6   | 4  | 2  | 6,88E-001 |
| Actinobacteria  | Mobiluncus_curtisii_ATCC_43063_chromosome_NC_014246                                   | IS3 | 6   | 2  | 4  | 6,88E-001 |
| Bacteroidetes   | Ornithobacterium_rhinotracheale_DSM_15997_chromosome_NC_018016                        | IS3 | 6   | 2  | 4  | 6,88E-001 |
| Proteobacteria  | Polaromonas_sp._JS666_chromosome_NC_007948                                            | IS3 | 6   | 2  | 4  | 6,88E-001 |
| Proteobacteria  | Pseudovibrio_sp._FO-BEG1_chromosome_NC_016642                                         | IS3 | 6   | 4  | 2  | 6,88E-001 |
| Actinobacteria  | Rhodococcus_jostii_RHA1_chromosome_NC_008268                                          | IS3 | 6   | 4  | 2  | 6,88E-001 |
| Actinobacteria  | Segniliparus_rotundus_DSM_44985_chromosome_NC_014168                                  | IS3 | 6   | 2  | 4  | 6,88E-001 |
| Proteobacteria  | Shewanella_sp._ANA-3_chromosome_chromosome_1_NC_008577                                | IS3 | 6   | 2  | 4  | 6,88E-001 |
| Actinobacteria  | Slackia_heliotrinireducens_DSM_20476_chromosome_NC_013165                             | IS3 | 6   | 2  | 4  | 6,88E-001 |
| Firmicutes      | Streptococcus_pneumoniae_Hungary19A-6_NC_010380                                       | IS3 | 6   | 2  | 4  | 6,88E-001 |
| Firmicutes      | Thermodesulfobium_narugense_DSM_14796_chromosome_NC_015499                            | IS3 | 6   | 2  | 4  | 6,88E-001 |
| Proteobacteria  | Vibrio_anguillarum_775_chromosome_chromosome_I_NC_015633                              | IS3 | 6   | 2  | 4  | 6,88E-001 |
| Proteobacteria  | Xenorhabdus_bovienii_SS-2004_chromosome_NC_013892                                     | IS3 | 6   | 4  | 2  | 6,88E-001 |
| Proteobacteria  | Acidiphilium_multivorans_AIU301_NC_015186                                             | IS3 | 8   | 5  | 3  | 7,27E-001 |
| Actinobacteria  | Arthrobacter_aurescens_TC1_NC_008711                                                  | IS3 | 8   | 3  | 5  | 7,27E-001 |
| Proteobacteria  | Citrobacter_rodentium_ICC168_NC_013716                                                | IS3 | 8   | 3  | 5  | 7,27E-001 |
| Chloroflexi     | Dehalococcoides_sp._BAV1_chromosome_NC_009455                                         | IS3 | 8   | 5  | 3  | 7,27E-001 |
| Firmicutes      | Desulfotomaculum_reducens_MI-1_chromosome_NC_009253                                   | IS3 | 8   | 5  | 3  | 7,27E-001 |
| Proteobacteria  | Desulfovibrio_vulgaris_RCH1_chromosome_NC_017310                                      | IS3 | 8   | 5  | 3  | 7,27E-001 |
| Firmicutes      | Geobacillus_thermodenitrificans_NG80-2_chromosome_NC_009328                           | IS3 | 8   | 5  | 3  | 7,27E-001 |
| Firmicutes      | Geobacillus_thermoglucosidasius_C56-YS93_chromosome_NC_015660                         | IS3 | 8   | 5  | 3  | 7,27E-001 |
| Firmicutes      | Lactobacillus_acidophilus_30SC_chromosome_NC_015214                                   | IS3 | 8   | 5  | 3  | 7,27E-001 |
| Firmicutes      | Lactobacillus_rhamnosus_GG_NC_013198                                                  | IS3 | 8   | 3  | 5  | 7,27E-001 |

|                |                                                                         |     |    |    |    |           |
|----------------|-------------------------------------------------------------------------|-----|----|----|----|-----------|
| Proteobacteria | Leptothrix_cholodnii_SP-6_chromosome_NC_010524                          | IS3 | 8  | 5  | 3  | 7,27E-001 |
| Firmicutes     | Mahella_australiensis_50-1_BON_chromosome_NC_015520                     | IS3 | 8  | 3  | 5  | 7,27E-001 |
| Proteobacteria | Methylococcus_capsulatus_str_Bath_chromosome_NC_002977                  | IS3 | 8  | 5  | 3  | 7,27E-001 |
| Proteobacteria | Serratia_proteamaculans_568_chromosome_NC_009832                        | IS3 | 8  | 5  | 3  | 7,27E-001 |
| Actinobacteria | Arcanobacterium_haemolyticum_DSM_20595_chromosome_NC_014218             | IS3 | 10 | 6  | 4  | 7,54E-001 |
| Proteobacteria | Cellvibrio_japonicus_Ueda107_chromosome_NC_010995                       | IS3 | 10 | 6  | 4  | 7,54E-001 |
| Firmicutes     | Clostridium_kluyveri_DSM_555_chromosome_NC_009706                       | IS3 | 10 | 6  | 4  | 7,54E-001 |
| Firmicutes     | Clostridium_tetani_E88_chromosome_NC_004557                             | IS3 | 10 | 4  | 6  | 7,54E-001 |
| Actinobacteria | Corynebacterium_variabile_DSM_44702_chromosome_NC_015859                | IS3 | 10 | 6  | 4  | 7,54E-001 |
| Proteobacteria | Dickeya_dadantii_3937_chromosome_NC_014500                              | IS3 | 10 | 4  | 6  | 7,54E-001 |
| Proteobacteria | Edwardsiella_ictaluri_93-146_chromosome_NC_012779                       | IS3 | 10 | 6  | 4  | 7,54E-001 |
| Proteobacteria | Erythrobacter_litoralis_HTCC2594_chromosome_NC_007722                   | IS3 | 10 | 6  | 4  | 7,54E-001 |
| Proteobacteria | Herminiimonas_arsenicoydans_chromosome_NC_009138                        | IS3 | 10 | 6  | 4  | 7,54E-001 |
| Proteobacteria | Marinomonas_sp_MWYL1_chromosome_NC_009654                               | IS3 | 10 | 6  | 4  | 7,54E-001 |
| Actinobacteria | Mycobacterium_smegmatis_str_MC2_155_chromosome_NC_018289                | IS3 | 10 | 6  | 4  | 7,54E-001 |
| Tenericutes    | Mycoplasma_bovis_HB0801_chromosome_NC_018077                            | IS3 | 10 | 4  | 6  | 7,54E-001 |
| Proteobacteria | Rhodobacter_sphaeroides_ATCC_17025_chromosome_NC_009428                 | IS3 | 10 | 4  | 6  | 7,54E-001 |
| Proteobacteria | Shewanella_frigidimarina_NCIMB_400_chromosome_NC_008345                 | IS3 | 10 | 6  | 4  | 7,54E-001 |
| Firmicutes     | Streptococcus_mutans_UA159_chromosome_NC_004350                         | IS3 | 10 | 4  | 6  | 7,54E-001 |
| Proteobacteria | Yersinia_pestis_A1122_chromosome_NC_017168                              | IS3 | 10 | 4  | 6  | 7,54E-001 |
| Firmicutes     | Acidaminococcus_intestini_RyC-MR95_chromosome_NC_016077                 | IS3 | 12 | 5  | 7  | 7,74E-001 |
| Firmicutes     | Bacillus_cereus_NC7401_NC_016771                                        | IS3 | 12 | 5  | 7  | 7,74E-001 |
| Proteobacteria | Burkholderia_cenocepacia_MC0-3_chromosome_chromosome_2_NC_010515        | IS3 | 12 | 5  | 7  | 7,74E-001 |
| Proteobacteria | Gluconobacter_oxydans_621H_chromosome_NC_006677                         | IS3 | 12 | 5  | 7  | 7,74E-001 |
| Firmicutes     | Halobacillus_halophilus_DSM_2266_NC_017668                              | IS3 | 12 | 5  | 7  | 7,74E-001 |
| Firmicutes     | Lactobacillus_casei_ATCC_334_NC_008526                                  | IS3 | 12 | 7  | 5  | 7,74E-001 |
| Firmicutes     | Lactobacillus_ruminis_ATCC_27782_chromosome_NC_015975                   | IS3 | 12 | 7  | 5  | 7,74E-001 |
| Proteobacteria | Thiomonas_intermedia_K12_chromosome_NC_014153                           | IS3 | 12 | 5  | 7  | 7,74E-001 |
| Firmicutes     | Clostridium_cellulolyticum_H10_chromosome_NC_011898                     | IS3 | 53 | 25 | 28 | 7,84E-001 |
| Proteobacteria | Azotobacter_vinelandii_DJ_chromosome_NC_012560                          | IS3 | 14 | 8  | 6  | 7,91E-001 |
| Bacteroidetes  | Zunongwangia_profunda_SM-A87_chromosome_NC_014041                       | IS3 | 14 | 6  | 8  | 7,91E-001 |
| Proteobacteria | Caulobacter_sp_K31_chromosome_NC_010338                                 | IS3 | 16 | 7  | 9  | 8,04E-001 |
| Firmicutes     | Dehalobacter_sp_DCA_chromosome_NC_018866                                | IS3 | 16 | 7  | 9  | 8,04E-001 |
| Proteobacteria | Erwinia_pyrifoliae_DSM_12163_NC_017390                                  | IS3 | 16 | 7  | 9  | 8,04E-001 |
| Actinobacteria | Mycobacterium_marinum_M_chromosome_NC_010612                            | IS3 | 16 | 7  | 9  | 8,04E-001 |
| Actinobacteria | Arthrobacter_arilaitensis_Re117_chromosome_NC_014550                    | IS3 | 18 | 10 | 8  | 8,15E-001 |
| Actinobacteria | Mycobacterium_avium_104_NC_008595                                       | IS3 | 18 | 8  | 10 | 8,15E-001 |
| Firmicutes     | Lactobacillus_sanfranciscensis_TMW_1.1304_chromosome_NC_015978          | IS3 | 20 | 11 | 9  | 8,24E-001 |
| Actinobacteria | Corynebacterium_aurimucosum_ATCC_700975_NC_012590                       | IS3 | 26 | 12 | 14 | 8,45E-001 |
| Actinobacteria | Corynebacterium_jeikeium_K411_chromosome_NC_007164                      | IS3 | 26 | 14 | 12 | 8,45E-001 |
| Proteobacteria | Nitrosomonas_eutropha_C91_chromosome_NC_008344                          | IS3 | 26 | 12 | 14 | 8,45E-001 |
| Proteobacteria | Nitrosomonas_europaea_ATCC_19718_chromosome_NC_004757                   | IS3 | 36 | 17 | 19 | 8,68E-001 |
| Actinobacteria | Streptomyces_bingchenggensis_BCW-1_chromosome_NC_016582                 | IS3 | 40 | 19 | 21 | 8,75E-001 |
| Proteobacteria | Shigella_boydii_CDC_3083-94_chromosome_NC_010658                        | IS3 | 68 | 33 | 35 | 9,04E-001 |
| Actinobacteria | Renibacterium_salmoninarum_ATCC_33209_chromosome_NC_010168              | IS3 | 80 | 41 | 39 | 9,11E-001 |
| Proteobacteria | Alicyclophilus_denitrificans_BC_chromosome_NC_014910                    | IS3 | 16 | 8  | 8  | 1,00E+000 |
| Bacteroidetes  | Alistipes_finegoldii_DSM_17242_chromosome_NC_018011                     | IS3 | 18 | 9  | 9  | 1,00E+000 |
| Firmicutes     | Bacillus_cellulosilyticus_DSM_2522_chromosome_NC_014829                 | IS3 | 6  | 3  | 3  | 1,00E+000 |
| Actinobacteria | Bifidobacterium_bifidum_PRL2010_chromosome_NC_014638                    | IS3 | 6  | 3  | 3  | 1,00E+000 |
| Proteobacteria | Bradyrhizobium_sp_OR_278_chromosome_NC_009445                           | IS3 | 6  | 3  | 3  | 1,00E+000 |
| Proteobacteria | Burkholderia_thailandensis_E264_chromosome_chromosome_I_NC_007651       | IS3 | 6  | 3  | 3  | 1,00E+000 |
| Chlamydiae     | Candidatus_Protochlamydia_amoebophila_UWE25_chromosome_NC_005861        | IS3 | 6  | 3  | 3  | 1,00E+000 |
| Firmicutes     | Clostridium_saccharolyticum_WM1_chromosome_NC_014376                    | IS3 | 6  | 3  | 3  | 1,00E+000 |
| Proteobacteria | Delftia_acidovorans_SPH-1_chromosome_NC_010002                          | IS3 | 10 | 5  | 5  | 1,00E+000 |
| Proteobacteria | Desulfomicrobium_baculatum_DSM_4028_NC_013173                           | IS3 | 10 | 5  | 5  | 1,00E+000 |
| Chrysiogenetes | Desulfurispirillum_indicum_S5_chromosome_NC_014836                      | IS3 | 8  | 4  | 4  | 1,00E+000 |
| Proteobacteria | Dinoroseobacter_shibae_DFL_12_chromosome_NC_009952                      | IS3 | 10 | 5  | 5  | 1,00E+000 |
| Bacteroidetes  | Dyadobacter_fermentans_DSM_18053_chromosome_NC_013037                   | IS3 | 10 | 5  | 5  | 1,00E+000 |
| Proteobacteria | Enterobacter_sp_638_NC_009436                                           | IS3 | 6  | 3  | 3  | 1,00E+000 |
| Firmicutes     | Enterococcus_faecalis_62_chromosome_NC_017312                           | IS3 | 6  | 3  | 3  | 1,00E+000 |
| Proteobacteria | Gallibacterium_anatis_UMN179_chromosome_NC_015460                       | IS3 | 16 | 8  | 8  | 1,00E+000 |
| Proteobacteria | Klebsiella_pneumoniae_KCTC_2242_chromosome_NC_017540                    | IS3 | 14 | 7  | 7  | 1,00E+000 |
| Proteobacteria | Marinobacter_aquaeolei_VT8_NC_008740                                    | IS3 | 6  | 3  | 3  | 1,00E+000 |
| Firmicutes     | Moorella_thermoacetica_ATCC_39073_chromosome_NC_007644                  | IS3 | 6  | 3  | 3  | 1,00E+000 |
| Actinobacteria | Mycobacterium_smegmatis_str_MC2_155_chromosome_NC_008596                | IS3 | 6  | 3  | 3  | 1,00E+000 |
| Tenericutes    | Onion_yellow_phytoplasma_OY-M_NC_005303                                 | IS3 | 8  | 4  | 4  | 1,00E+000 |
| Firmicutes     | Paenibacillus_polymyxa_E681_chromosome_NC_014483                        | IS3 | 12 | 6  | 6  | 1,00E+000 |
| Proteobacteria | Pseudomonas_fluorescens_F113_chromosome_NC_016830                       | IS3 | 6  | 3  | 3  | 1,00E+000 |
| Proteobacteria | Salmonella_enterica_subsp_arizonae_serovar_62:z4_NC_010067              | IS3 | 10 | 5  | 5  | 1,00E+000 |
| Proteobacteria | Shewanella_woodyi_ATCC_51908_chromosome_NC_010506                       | IS3 | 6  | 3  | 3  | 1,00E+000 |
| Proteobacteria | Sorangium_cellulosum_'So_ce_56'_chromosome_NC_010162                    | IS3 | 8  | 4  | 4  | 1,00E+000 |
| Spirochaetes   | Spirochaeta_smaragdinae_DSM_11293_chromosome_NC_014364                  | IS3 | 6  | 3  | 3  | 1,00E+000 |
| Firmicutes     | Acetobacterium_woodii_DSM_1030_chromosome_NC_016894                     | IS3 | 9  | 5  | 4  | 1,00E+000 |
| Proteobacteria | Achromobacter_xylosoxidans_A8_chromosome_NC_014640                      | IS3 | 9  | 4  | 5  | 1,00E+000 |
| Proteobacteria | Aggregatibacter_actinomycetemcomitans_D7S-1_chromosome_NC_017846        | IS3 | 13 | 6  | 7  | 1,00E+000 |
| Firmicutes     | Amphibacillus_xylanus_NBRC_15112_NC_018704                              | IS3 | 9  | 4  | 5  | 1,00E+000 |
| Actinobacteria | Arthrobacter_phenanthrenivorans_Sphe3_chromosome_NC_015145              | IS3 | 17 | 8  | 9  | 1,00E+000 |
| Firmicutes     | Bacillus_thuringiensis_serovar_konkukian_str_97-27_chromosome_NC_005957 | IS3 | 7  | 3  | 4  | 1,00E+000 |
| Proteobacteria | Burkholderia_glumae_BGR1_chromosome_chromosome_1_NC_012724              | IS3 | 11 | 6  | 5  | 1,00E+000 |
| Proteobacteria | Burkholderia_glumae_BGR1_chromosome_chromosome_2_NC_012721              | IS3 | 11 | 6  | 5  | 1,00E+000 |
| Proteobacteria | Burkholderia_multivorans_ATCC_17616_uid58697_chromosome_1_NC_010084     | IS3 | 9  | 5  | 4  | 1,00E+000 |
| Proteobacteria | Burkholderia_phytofirmans_PsJN_chromosome_chromosome_1_NC_010681        | IS3 | 7  | 4  | 3  | 1,00E+000 |
| Proteobacteria | Burkholderia_vietnamiensis_G4_chromosome_3_NC_009254                    | IS3 | 7  | 3  | 4  | 1,00E+000 |
| Proteobacteria | Burkholderia_xenovorans_LB400_chromosome_1_NC_007951                    | IS3 | 19 | 10 | 9  | 1,00E+000 |

|                 |                                                                              |      |    |    |    |           |
|-----------------|------------------------------------------------------------------------------|------|----|----|----|-----------|
| Nitrospirae     | Candidatus_Nitrospira_defluvii_NC_014355                                     | IS3  | 11 | 5  | 6  | 1,00E+000 |
| Tenericutes     | Candidatus_Phytoplasma_australiense_NC_010544                                | IS3  | 9  | 5  | 4  | 1,00E+000 |
| Proteobacteria  | Caulobacter_crescentus_CB15_chromosome_NC_002696                             | IS3  | 7  | 3  | 4  | 1,00E+000 |
| Firmicutes      | Clostridium_sp._SY8519_NC_015737                                             | IS3  | 9  | 4  | 5  | 1,00E+000 |
| Firmicutes      | Clostridium_thermocellum_ATCC_27405_chromosome_NC_009012                     | IS3  | 17 | 9  | 8  | 1,00E+000 |
| Actinobacteria  | Corynebacterium_resistens_DSM_45100_chromosome_NC_015673                     | IS3  | 13 | 6  | 7  | 1,00E+000 |
| Deferribacteres | Denitrovibrio_acetiphilus_DSM_12809_chromosome_NC_013943                     | IS3  | 17 | 8  | 9  | 1,00E+000 |
| Proteobacteria  | Desulfobacula_toluolica_Tol2_NC_018645                                       | IS3  | 15 | 8  | 7  | 1,00E+000 |
| Firmicutes      | Desulfotomaculum_ruminis_DSM_2154_chromosome_NC_015589                       | IS3  | 17 | 9  | 8  | 1,00E+000 |
| Proteobacteria  | Desulfovibrio_alaskensis_G20_chromosome_NC_007519                            | IS3  | 19 | 9  | 10 | 1,00E+000 |
| Proteobacteria  | Dickeya_zeae_Ech1591_chromosome_NC_012912                                    | IS3  | 7  | 3  | 4  | 1,00E+000 |
| Firmicutes      | Erysipelothrix_rhusiopathiae_str._Fujisawa_NC_015601                         | IS3  | 9  | 5  | 4  | 1,00E+000 |
| Proteobacteria  | Geobacter_sulfurreducens_PCA_chromosome_NC_002939                            | IS3  | 11 | 5  | 6  | 1,00E+000 |
| Proteobacteria  | Halorhodospira_halophila_SL1_chromosome_NC_008789                            | IS3  | 7  | 4  | 3  | 1,00E+000 |
| Firmicutes      | Lactobacillus_reuteri_SD2112_chromosome_NC_015697                            | IS3  | 7  | 4  | 3  | 1,00E+000 |
| Bacteroidetes   | Leadbetterella_byssophila_DSM_17132_chromosome_NC_014655                     | IS3  | 13 | 7  | 6  | 1,00E+000 |
| Firmicutes      | Megasphaera_elsdenii_DSM_20460_NC_015873                                     | IS3  | 11 | 5  | 6  | 1,00E+000 |
| Proteobacteria  | Methylobacterium_sp._4-46_chromosome_NC_010511                               | IS3  | 13 | 6  | 7  | 1,00E+000 |
| Proteobacteria  | Methylomonas_methanica_MC09_chromosome_NC_015572                             | IS3  | 19 | 9  | 10 | 1,00E+000 |
| Actinobacteria  | Micromonospora_aurantiaca_ATCC_27029_chromosome_NC_014391                    | IS3  | 7  | 3  | 4  | 1,00E+000 |
| Actinobacteria  | Mycobacterium_sp._JLS_chromosome_NC_009077                                   | IS3  | 19 | 9  | 10 | 1,00E+000 |
| Tenericutes     | Mycoplasma_hyorhinis_HUB-1_chromosome_NC_014448                              | IS3  | 19 | 9  | 10 | 1,00E+000 |
| Firmicutes      | Pelotomaculum_thermopropionicum_SI_chromosome_NC_009454                      | IS3  | 9  | 5  | 4  | 1,00E+000 |
| Proteobacteria  | Phaeobacter_gallaeciensis_2.10_chromosome_NC_018286                          | IS3  | 7  | 3  | 4  | 1,00E+000 |
| Proteobacteria  | Providencia_stuartii_MRSN_2154_chromosome_NC_017731                          | IS3  | 7  | 3  | 4  | 1,00E+000 |
| Proteobacteria  | Pseudomonas_aeruginosa_DK2_chromosome_NC_018080                              | IS3  | 11 | 6  | 5  | 1,00E+000 |
| Proteobacteria  | Ralstonia_solanacearum_CFBP2957_chromosome_NC_014307                         | IS3  | 7  | 4  | 3  | 1,00E+000 |
| Proteobacteria  | Rhodomicrobium_vannielii_ATCC_17100_chromosome_NC_014664                     | IS3  | 17 | 8  | 9  | 1,00E+000 |
| Proteobacteria  | Roseobacter_denitrificans_OCh_114_chromosome_NC_008209                       | IS3  | 11 | 5  | 6  | 1,00E+000 |
| Actinobacteria  | Saccharopolyspora_erythraea_NRRL_2338_chromosome_NC_009142                   | IS3  | 13 | 6  | 7  | 1,00E+000 |
| Proteobacteria  | Shewanella_denitrificans_OS217_NC_007954                                     | IS3  | 9  | 4  | 5  | 1,00E+000 |
| Proteobacteria  | Sinorhizobium_fredii_USDA_257_chromosome_NC_018000                           | IS3  | 7  | 3  | 4  | 1,00E+000 |
| Firmicutes      | Staphylococcus_aureus_subsp._aureus_ED133_chromosome_NC_017337               | IS3  | 7  | 3  | 4  | 1,00E+000 |
| Proteobacteria  | Stenotrophomonas_maltophilia_D457_NC_017671                                  | IS3  | 7  | 3  | 4  | 1,00E+000 |
| Actinobacteria  | Streptomyces_scabiei_87.22_chromosome_NC_013929                              | IS3  | 13 | 7  | 6  | 1,00E+000 |
| Aquificae       | Sulfurihydrogenibium_azorense_Az-Fu1_chromosome_NC_012438                    | IS3  | 13 | 7  | 6  | 1,00E+000 |
| Proteobacteria  | Thioalkalivibrio_sp._K90mix_chromosome_NC_013889                             | IS3  | 7  | 4  | 3  | 1,00E+000 |
| Actinobacteria  | Tsukamurella_paurometabola_DSM_20162_chromosome_NC_014158                    | IS3  | 9  | 5  | 4  | 1,00E+000 |
| Spirochaetes    | Turneriella_parva_DSM_21527_chromosome_NC_018020                             | IS3  | 19 | 9  | 10 | 1,00E+000 |
| Proteobacteria  | Variovorax_paradoxus_EPS_chromosome_NC_014931                                | IS3  | 7  | 4  | 3  | 1,00E+000 |
| Chlamydiae      | Waddlia_chondrophila_WSU_86-1044_chromosome_NC_014225                        | IS3  | 13 | 6  | 7  | 1,00E+000 |
| Proteobacteria  | Wolinella_succinogenes_DSM_1740_chromosome_NC_005090                         | IS3  | 15 | 7  | 8  | 1,00E+000 |
| Proteobacteria  | Yersinia_enterocolitica_subsp._enterocolitica_8081_chromosome_NC_008800      | IS3  | 13 | 6  | 7  | 1,00E+000 |
| Proteobacteria  | Gluconacetobacter_diazotrophicus_PAI_5_uid59075_chromosome_NC_011365         | IS3  | 21 | 10 | 11 | 1,00E+000 |
| Firmicutes      | Halanaerobium_hydrogeniformans_chromosome_NC_014654                          | IS3  | 21 | 11 | 10 | 1,00E+000 |
| Actinobacteria  | Microlunatus_phosphovorus_NM-1_NC_015635                                     | IS3  | 21 | 11 | 10 | 1,00E+000 |
| Proteobacteria  | Shewanella_oneidensis_MR-1_chromosome_NC_004347                              | IS3  | 37 | 19 | 18 | 1,00E+000 |
| Proteobacteria  | Rickettsia_peacockii_str._Rustic_NC_012730                                   | IS3  | 29 | 15 | 14 | 1,00E+000 |
| Proteobacteria  | Xanthomonas_campestris_pv._campestris_str._8004_chromosome_NC_007086         | IS3  | 27 | 13 | 14 | 1,00E+000 |
| Firmicutes      | Streptococcus_mitis_B6_NC_013853                                             | IS30 | 45 | 3  | 42 | 8,65E-010 |
| Firmicutes      | Lactobacillus_kefiranofaciens_ZW3_chromosome_NC_015602                       | IS30 | 9  | 9  | 0  | 3,91E-003 |
| Proteobacteria  | Vibrio_vulnificus_CMCP6_chromosome_I_NC_004459                               | IS30 | 7  | 0  | 7  | 1,56E-002 |
| Firmicutes      | Staphylococcus_aureus_subsp._aureus_MRSA252_chromosome_NC_002952             | IS30 | 6  | 0  | 6  | 3,13E-002 |
| Proteobacteria  | Neisseria_meningitidis_M04-240196_chromosome_NC_017515                       | IS30 | 12 | 2  | 10 | 3,86E-002 |
| Firmicutes      | Lactobacillus_acidophilus_30SC_chromosome_NC_015214                          | IS30 | 9  | 8  | 1  | 3,91E-002 |
| Proteobacteria  | Xanthomonas_oryzae_pv._oryzae_KACC10331_chromosome_NC_006834                 | IS30 | 29 | 20 | 9  | 6,14E-002 |
| Actinobacteria  | Mycobacterium_rhodesiae_NBB3_chromosome_NC_016604                            | IS30 | 8  | 7  | 1  | 7,03E-002 |
| Firmicutes      | Selenomonas_sputigena_ATCC_35185_chromosome_NC_015437                        | IS30 | 8  | 1  | 7  | 7,03E-002 |
| Firmicutes      | Lactobacillus_buchneri_NRRL_B-30929_chromosome_NC_015428                     | IS30 | 13 | 10 | 3  | 9,23E-002 |
| Actinobacteria  | Saccharopolyspora_erythraea_NRRL_2338_chromosome_NC_009142                   | IS30 | 12 | 3  | 9  | 1,46E-001 |
| Firmicutes      | Streptococcus_pneumoniae_AP200_chromosome_NC_014494                          | IS30 | 9  | 7  | 2  | 1,80E-001 |
| Firmicutes      | Clostridium_cellulovorans_743B_chromosome_NC_014393                          | IS30 | 6  | 5  | 1  | 2,19E-001 |
| Tenericutes     | Mycoplasma_penetrans_HF-2_NC_004432                                          | IS30 | 6  | 1  | 5  | 2,19E-001 |
| Proteobacteria  | Psychromonas_ingrahamii_37_chromosome_NC_008709                              | IS30 | 6  | 1  | 5  | 2,19E-001 |
| Firmicutes      | Halanaerobium_hydrogeniformans_chromosome_NC_014654                          | IS30 | 11 | 8  | 3  | 2,27E-001 |
| Firmicutes      | Streptococcus_infantarius_subsp._infantarius_CJ18_chromosome_NC_016826       | IS30 | 11 | 3  | 8  | 2,27E-001 |
| Firmicutes      | Clostridium_thermocellum_ATCC_27405_chromosome_NC_009012                     | IS30 | 27 | 17 | 10 | 2,48E-001 |
| Actinobacteria  | Arthrobacter_phenanthrenivorans_Sphe3_chromosome_NC_015145                   | IS30 | 8  | 2  | 6  | 2,89E-001 |
| Actinobacteria  | Corynebacterium_diphtheriae_31A_chromosome_NC_016799                         | IS30 | 8  | 6  | 2  | 2,89E-001 |
| Actinobacteria  | Tsukamurella_paurometabola_DSM_20162_chromosome_NC_014158                    | IS30 | 10 | 7  | 3  | 3,44E-001 |
| Proteobacteria  | Francisella_philomiragia_subsp._philomiragia_ATCC_25017_chromosome_NC_010336 | IS30 | 46 | 20 | 26 | 4,61E-001 |
| Firmicutes      | Lactobacillus_fermentum_CECT_5716_chromosome_NC_017465                       | IS30 | 9  | 3  | 6  | 5,08E-001 |
| Firmicutes      | Streptococcus_salivarius_57.I_chromosome_NC_017594                           | IS30 | 9  | 6  | 3  | 5,08E-001 |
| Firmicutes      | Thermoanaerobacter_brockii_subsp._finnii_Ako-1_chromosome_NC_014964          | IS30 | 9  | 6  | 3  | 5,08E-001 |
| Firmicutes      | Thermoanaerobacter_pseudethanolicus_ATCC_33223_chromosome_NC_010321          | IS30 | 9  | 6  | 3  | 5,08E-001 |
| Actinobacteria  | Leifsonia_xyli_subsp._xyli_str._CTCB07_chromosome_NC_006087                  | IS30 | 15 | 6  | 9  | 6,07E-001 |
| Proteobacteria  | Burkholderia_vietnamiensis_G4_chromosome_3_NC_009254                         | IS30 | 6  | 2  | 4  | 6,88E-001 |
| Actinobacteria  | Corynebacterium_jeikeium_K411_chromosome_NC_007164                           | IS30 | 6  | 4  | 2  | 6,88E-001 |
| Firmicutes      | Lactobacillus_plantarum_subsp._plantarum_ST-III_chromosome_NC_014554         | IS30 | 6  | 4  | 2  | 6,88E-001 |
| Proteobacteria  | Marinomonas_mediterranea_MMB-1_chromosome_NC_015276                          | IS30 | 6  | 4  | 2  | 6,88E-001 |
| Actinobacteria  | Nakamurella_multipartita_DSM_44233_chromosome_NC_013235                      | IS30 | 6  | 4  | 2  | 6,88E-001 |
| Acidobacteria   | Terriglobus_saanensis_SP1PR4_chromosome_NC_014963                            | IS30 | 6  | 2  | 4  | 6,88E-001 |
| Proteobacteria  | Shewanella_baltica_OS117_chromosome_NC_017579                                | IS30 | 25 | 14 | 11 | 6,90E-001 |
| Firmicutes      | Lactobacillus_casei_ATCC_334_NC_008526                                       | IS30 | 27 | 12 | 15 | 7,01E-001 |

|                |                                                                           |       |     |    |     |           |
|----------------|---------------------------------------------------------------------------|-------|-----|----|-----|-----------|
| Actinobacteria | Clavibacter_michiganensis_subsp._sepedonicus_chromosome_NC_010407         | IS30  | 8   | 5  | 3   | 7,27E-001 |
| Firmicutes     | Lactococcus_lactis_subsp._lactis_CV56_chromosome_NC_017486                | IS30  | 8   | 3  | 5   | 7,27E-001 |
| Firmicutes     | Oscillibacter_valericigenes_Sjm18-20_NC_016048                            | IS30  | 8   | 3  | 5   | 7,27E-001 |
| Firmicutes     | Streptococcus_equi_subsp._zooepidemicus_MGCS10565_NC_011134               | IS30  | 8   | 5  | 3   | 7,27E-001 |
| Firmicutes     | Lactobacillus_helveticus_H10_chromosome_NC_017467                         | IS30  | 10  | 6  | 4   | 7,54E-001 |
| Bacteroidetes  | Ornithobacterium_rhinotracheale_DSM_15997_chromosome_NC_018016            | IS30  | 10  | 4  | 6   | 7,54E-001 |
| Firmicutes     | Caldicellulosiruptor_kristjanssonii_177R1B_chromosome_NC_014721           | IS30  | 12  | 5  | 7   | 7,74E-001 |
| Firmicutes     | Clostridium_perfringens_SM101_chromosome_NC_008262                        | IS30  | 14  | 8  | 6   | 7,91E-001 |
| Firmicutes     | Lactobacillus_brevis_ATCC_367_NC_008497                                   | IS30  | 20  | 11 | 9   | 8,24E-001 |
| Proteobacteria | Allivibrio_salmonicida_LF11238_chromosome_chromosome_1_NC_011312          | IS30  | 6   | 3  | 3   | 1,00E+000 |
| Actinobacteria | Bifidobacterium_longum_DJO10A_chromosome_NC_010816                        | IS30  | 6   | 3  | 3   | 1,00E+000 |
| Actinobacteria | Blastococcus_saxobsidens_DD2_NC_016943                                    | IS30  | 6   | 3  | 3   | 1,00E+000 |
| Firmicutes     | Filifactor_alocis_ATCC_35896_chromosome_NC_016630                         | IS30  | 10  | 5  | 5   | 1,00E+000 |
| Firmicutes     | Lactobacillus_delbrueckii_subsp._bulgaricus_2038_chromosome_NC_017469     | IS30  | 10  | 5  | 5   | 1,00E+000 |
| Proteobacteria | Methylobacterium_sp._4-46_chromosome_NC_010511                            | IS30  | 14  | 7  | 7   | 1,00E+000 |
| Tenericutes    | Mycoplasma_bovis_PG45_chromosome_NC_014760                                | IS30  | 6   | 3  | 3   | 1,00E+000 |
| Proteobacteria | Photorhabdus_luminescens_subsp._laumondii_TTO1_NC_005126                  | IS30  | 6   | 3  | 3   | 1,00E+000 |
| Proteobacteria | Shewanella_denitrificans_OS217_NC_007954                                  | IS30  | 8   | 4  | 4   | 1,00E+000 |
| Firmicutes     | Streptococcus_pyogenes_MGAS10394_chromosome_NC_006086                     | IS30  | 12  | 6  | 6   | 1,00E+000 |
| Firmicutes     | Streptococcus_thermophilus_CNRZ1066_chromosome_NC_006449                  | IS30  | 12  | 6  | 6   | 1,00E+000 |
| Firmicutes     | Thermoanaerobacter_italicus_Ab9_chromosome_NC_013921                      | IS30  | 12  | 6  | 6   | 1,00E+000 |
| Proteobacteria | Acinetobacter_baumannii_ACICU_chromosome_NC_010611                        | IS30  | 7   | 4  | 3   | 1,00E+000 |
| Firmicutes     | Clostridium_clariflavum_DSM_19732_chromosome_NC_016627                    | IS30  | 13  | 7  | 6   | 1,00E+000 |
| Firmicutes     | Exiguobacterium_sibiricum_255-15_chromosome_NC_010556                     | IS30  | 11  | 6  | 5   | 1,00E+000 |
| Acidobacteria  | Granulicella_mallensis_MP5ACTX8_chromosome_NC_016631                      | IS30  | 7   | 4  | 3   | 1,00E+000 |
| Firmicutes     | Lactobacillus_amylovorus_GRL_1112_chromosome_NC_014724                    | IS30  | 9   | 5  | 4   | 1,00E+000 |
| Firmicutes     | Lactobacillus_crispatus_ST1_NC_014106                                     | IS30  | 7   | 4  | 3   | 1,00E+000 |
| Firmicutes     | Lactobacillus_johnsonii_NCC_533_NC_005362                                 | IS30  | 7   | 3  | 4   | 1,00E+000 |
| Cyanobacteria  | Microcystis_aeruginosa_NIES-843_chromosome_NC_010296                      | IS30  | 11  | 6  | 5   | 1,00E+000 |
| Actinobacteria | Mycobacterium_intracellulare_ATCC_13950_chromosome_NC_016946              | IS30  | 9   | 5  | 4   | 1,00E+000 |
| Actinobacteria | Mycobacterium_sp._MOTT36Y_chromosome_NC_017904                            | IS30  | 7   | 4  | 3   | 1,00E+000 |
| Proteobacteria | Nitrosomonas_sp._AL212_chromosome_NC_015222                               | IS30  | 11  | 5  | 6   | 1,00E+000 |
| Actinobacteria | Pseudonocardia_dioxanivorans_CB1190_chromosome_NC_015312                  | IS30  | 9   | 4  | 5   | 1,00E+000 |
| Firmicutes     | Streptococcus_dysgalactiae_subsp._equisimilis_RE378_NC_018712             | IS30  | 11  | 5  | 6   | 1,00E+000 |
| Firmicutes     | Thermoanaerobacter_wiegelei_Rt8.B1_chromosome_NC_015958                   | IS30  | 11  | 6  | 5   | 1,00E+000 |
| Spirochaetes   | Turneriella_parva_DSM_21527_chromosome_NC_018020                          | IS30  | 15  | 8  | 7   | 1,00E+000 |
| Firmicutes     | Lactobacillus_reuteri_SD2112_chromosome_NC_015697                         | IS30  | 53  | 27 | 26  | 1,00E+000 |
| Proteobacteria | Bordetella_pertussis_CS_chromosome_NC_017223                              | IS481 | 199 | 84 | 115 | 3,32E-002 |
| Acidobacteria  | Acidobacterium_capsulatum_ATCC_51196_NC_012483                            | IS481 | 11  | 9  | 2   | 6,54E-002 |
| Actinobacteria | Clavibacter_michiganensis_subsp._sepedonicus_chromosome_NC_010407         | IS481 | 89  | 52 | 37  | 1,37E-001 |
| Proteobacteria | Acidovorax_citrulli_AAC00-1_chromosome_NC_008752                          | IS481 | 19  | 6  | 13  | 1,67E-001 |
| Proteobacteria | Bordetella_parapertussis_12822_chromosome_NC_002928                       | IS481 | 9   | 2  | 7   | 1,80E-001 |
| Actinobacteria | Cellulomonas_flavigena_DSM_20109_chromosome_NC_014151                     | IS481 | 6   | 1  | 5   | 2,19E-001 |
| Proteobacteria | Cellvibrio_gilvus_ATCC_13127_chromosome_NC_015671                         | IS481 | 6   | 1  | 5   | 2,19E-001 |
| Actinobacteria | Mycobacterium_sp._KMS_chromosome_NC_008705                                | IS481 | 7   | 5  | 2   | 4,53E-001 |
| Actinobacteria | Streptomyces_hygroscopicus_subsp._jinggangensis_5008_chromosome_NC_017765 | IS481 | 15  | 6  | 9   | 6,07E-001 |
| Actinobacteria | Mycobacterium_avium_104_NC_008595                                         | IS481 | 6   | 2  | 4   | 6,88E-001 |
| Actinobacteria | Nakamurella_multipartita_DSM_44233_chromosome_NC_013235                   | IS481 | 6   | 4  | 2   | 6,88E-001 |
| Actinobacteria | Leifsonia_xyli_subsp._xyli_str._CTCB07_chromosome_NC_006087               | IS481 | 6   | 3  | 3   | 1,00E+000 |
| Actinobacteria | Mycobacterium_marinum_M_chromosome_NC_010612                              | IS481 | 7   | 3  | 4   | 1,00E+000 |
| Actinobacteria | Streptomyces_coelicolor_A3(2)_chromosome_NC_003888                        | IS481 | 9   | 5  | 4   | 1,00E+000 |
| Proteobacteria | Shigella_dysenteriae_Sd197_NC_007606                                      | IS4a  | 11  | 10 | 1   | 1,17E-002 |
| Proteobacteria | Shigella_flexneri_2a_str._301_chromosome_NC_004337                        | IS4a  | 17  | 13 | 4   | 4,90E-002 |
| Actinobacteria | Frankia_symbiont_of_Datisca_glomerata_chromosome_NC_015656                | IS4a  | 16  | 4  | 12  | 7,68E-002 |
| Proteobacteria | Shigella_sonnei_53G_NC_016822                                             | IS4a  | 35  | 23 | 12  | 8,95E-002 |
| Actinobacteria | Corynebacterium_efficiens_YS-314_chromosome_NC_004369                     | IS4a  | 9   | 2  | 7   | 1,80E-001 |
| Actinobacteria | Frankia_sp._CcI3_chromosome_NC_007777                                     | IS4a  | 6   | 1  | 5   | 2,19E-001 |
| Proteobacteria | Yersinia_enterocolitica_subsp._enterocolitica_8081_chromosome_NC_008800   | IS4a  | 11  | 3  | 8   | 2,27E-001 |
| Proteobacteria | Rahnella_aquatilis_HX2_chromosome_NC_017047                               | IS4a  | 14  | 9  | 5   | 4,24E-001 |
| Proteobacteria | Vibrio_harveyi_ATCC_BAA-1116_chromosome_chromosome_I_NC_009783            | IS4a  | 27  | 11 | 16  | 4,42E-001 |
| Proteobacteria | Rahnella_sp._Y9602_chromosome_NC_015061                                   | IS4a  | 11  | 7  | 4   | 5,49E-001 |
| Actinobacteria | Frankia_sp._EAN1pec_chromosome_NC_009921                                  | IS4a  | 13  | 8  | 5   | 5,81E-001 |
| Proteobacteria | Shewanella_baltica_OS155_chromosome_NC_009052                             | IS4a  | 6   | 4  | 2   | 6,88E-001 |
| Proteobacteria | Vibrio_vulnificus_CMCP6_chromosome_I_NC_004459                            | IS4a  | 6   | 2  | 4   | 6,88E-001 |
| Actinobacteria | Mycobacterium_sp._Spyr1_chromosome_NC_014814                              | IS4a  | 8   | 5  | 3   | 7,27E-001 |
| Proteobacteria | Shigella_boydii_CDC_3083-94_chromosome_NC_010658                          | IS4a  | 20  | 11 | 9   | 8,24E-001 |
| Proteobacteria | Dickeya_zeae_Ech1591_chromosome_NC_012912                                 | IS4a  | 8   | 4  | 4   | 1,00E+000 |
| Actinobacteria | Microlunatus_phosphovorus_NM-1_NC_015635                                  | IS4a  | 6   | 3  | 3   | 1,00E+000 |
| Proteobacteria | Allivibrio_salmonicida_LF11238_chromosome_chromosome_1_NC_011312          | IS4a  | 9   | 4  | 5   | 1,00E+000 |
| Proteobacteria | Citrobacter_rodentium_ICC168_NC_013716                                    | IS4a  | 13  | 6  | 7   | 1,00E+000 |
| Proteobacteria | Escherichia_coli_IAI39_chromosome_NC_011750                               | IS4a  | 15  | 7  | 8   | 1,00E+000 |
| Proteobacteria | Sinorhizobium_meliloti_BL225C_chromosome_NC_017322                        | IS4b  | 6   | 0  | 6   | 3,13E-002 |
| Bacteroidetes  | Chitinophaga_pinensis_DSM_2588_chromosome_NC_013132                       | IS4b  | 9   | 1  | 8   | 3,91E-002 |
| Proteobacteria | Cellvibrio_japonicus_Ueda107_chromosome_NC_010995                         | IS4b  | 13  | 10 | 3   | 9,23E-002 |
| Proteobacteria | Gallionella_capsiferiformans_ES-2_chromosome_NC_014394                    | IS4b  | 11  | 3  | 8   | 2,27E-001 |
| Proteobacteria | Sinorhizobium_fredii_HH103_NC_016812                                      | IS4b  | 11  | 8  | 3   | 2,27E-001 |
| Firmicutes     | Desulfotomaculum_reducens_MI-1_chromosome_NC_009253                       | IS4b  | 7   | 2  | 5   | 4,53E-001 |
| Proteobacteria | Geobacter_metallireducens_GS-15_chromosome_NC_007517                      | IS4b  | 9   | 3  | 6   | 5,08E-001 |
| Proteobacteria | Nitrosomonas_sp._Is79A3_chromosome_NC_015731                              | IS4b  | 9   | 6  | 3   | 5,08E-001 |
| Bacteroidetes  | Porphyromonas_gingivalis_W83_chromosome_NC_002950                         | IS4b  | 10  | 6  | 4   | 7,54E-001 |
| Bacteroidetes  | Sphingobacterium_sp._21_chromosome_NC_015277                              | IS4b  | 12  | 5  | 7   | 7,74E-001 |
| Proteobacteria | Photorhabdus_luminescens_subsp._laumondii_TTO1_NC_005126                  | IS4c  | 11  | 2  | 9   | 6,54E-002 |
| Cyanobacteria  | Acaryochloris_marina_MBIC11017_chromosome_NC_009925                       | IS4c  | 6   | 5  | 1   | 2,19E-001 |
| Proteobacteria | Shewanella_putrefaciens_200_chromosome_NC_017566                          | IS4c  | 18  | 6  | 12  | 2,38E-001 |

|                 |                                                                                        |      |    |    |    |           |
|-----------------|----------------------------------------------------------------------------------------|------|----|----|----|-----------|
| Proteobacteria  | Vibrio_harveyi_ATCC_BAA-1116_chromosome_chromosome_I_NC_009783                         | IS4c | 19 | 12 | 7  | 3,59E-001 |
| Proteobacteria  | Sorangium_cellulosum_'So_ce_56'_chromosome_NC_010162                                   | IS4c | 9  | 3  | 6  | 5,08E-001 |
| Proteobacteria  | Legionella_pneumophila_str._Lens_NC_006369                                             | IS4c | 6  | 4  | 2  | 6,88E-001 |
| Proteobacteria  | Photobacterium_profundum_SS9_chromosome_2_NC_006371                                    | IS4c | 6  | 4  | 2  | 6,88E-001 |
| Cyanobacteria   | Microcystis_aeruginosa_NIES-843_chromosome_NC_010296                                   | IS4c | 17 | 9  | 8  | 1,00E+000 |
| Proteobacteria  | Escherichia_coli_O127:H6_str._E2348/69_chromosome_NC_011601                            | IS4c | 27 | 14 | 13 | 1,00E+000 |
| Proteobacteria  | Thioalkalivibrio_sulfidophilus_HL-EbGr7_chromosome_NC_011901                           | IS5a | 10 | 0  | 10 | 1,95E-003 |
| Firmicutes      | Thermincola_potens_JR_chromosome_NC_014152                                             | IS5a | 12 | 11 | 1  | 6,35E-003 |
| Firmicutes      | Caldicellulosiruptor_lactoaceticus_6A_chromosome_NC_015949                             | IS5a | 18 | 3  | 15 | 7,54E-003 |
| Firmicutes      | Bacillus_coagulans_2-6_chromosome_NC_015634                                            | IS5a | 7  | 7  | 0  | 1,56E-002 |
| Deferribacteres | Flexistipes_sinuarabici_DSM_4947_chromosome_NC_015672                                  | IS5a | 27 | 20 | 7  | 1,92E-002 |
| Proteobacteria  | Neisseria_meningitidis_G2136_chromosome_NC_017513                                      | IS5a | 10 | 1  | 9  | 2,15E-002 |
| Firmicutes      | Thermoanaerobacter_wiegelei_Rt8.B1_chromosome_NC_015958                                | IS5a | 13 | 2  | 11 | 2,25E-002 |
| Firmicutes      | Bacillus_cellulosilyticus_DSM_2522_chromosome_NC_014829                                | IS5a | 6  | 6  | 0  | 3,13E-002 |
| Firmicutes      | Kyrpidia_tusciae_DSM_2912_chromosome_NC_014098                                         | IS5a | 12 | 10 | 2  | 3,86E-002 |
| Firmicutes      | Thermoanaerobacter_italicus_Ab9_chromosome_NC_013921                                   | IS5a | 12 | 2  | 10 | 3,86E-002 |
| Firmicutes      | Oscillibacter_valericigenes_Sjm18-20_NC_016048                                         | IS5a | 10 | 2  | 8  | 1,09E-001 |
| Chlorobi        | Chlorobium_phaeobacteroides_BS1_chromosome_NC_010831                                   | IS5a | 12 | 9  | 3  | 1,46E-001 |
| Firmicutes      | Caldicellulosiruptor_hydrothermalis_108_chromosome_NC_014652                           | IS5a | 31 | 11 | 20 | 1,50E-001 |
| Firmicutes      | Alkaliphilus_metalliredigens_QYMF_chromosome_NC_009633                                 | IS5a | 9  | 2  | 7  | 1,80E-001 |
| Firmicutes      | Desulfosporosinus_acidiphilus_SJ4_chromosome_NC_018068                                 | IS5a | 23 | 15 | 8  | 2,10E-001 |
| Proteobacteria  | Pseudomonas_syringae_pv._tomato_str._DC3000_chromosome_NC_004578                       | IS5a | 41 | 16 | 25 | 2,11E-001 |
| Proteobacteria  | Alicyclophilus_denitrificans_BC_chromosome_NC_014910                                   | IS5a | 6  | 5  | 1  | 2,19E-001 |
| Firmicutes      | Lactobacillus_acidophilus_30SC_chromosome_NC_015214                                    | IS5a | 6  | 1  | 5  | 2,19E-001 |
| Firmicutes      | Staphylococcus_aureus_subsp._aureus_11819-97_chromosome_NC_017351                      | IS5a | 6  | 1  | 5  | 2,19E-001 |
| Proteobacteria  | Marinobacter_aquaeolei_VT8_NC_008740                                                   | IS5a | 11 | 8  | 3  | 2,27E-001 |
| Proteobacteria  | Pelobacter_propionicus_DSM_2379_chromosome_NC_008609                                   | IS5a | 25 | 16 | 9  | 2,30E-001 |
| Proteobacteria  | Escherichia_coli_str._K-12_substr._W3110_NC_007779                                     | IS5a | 18 | 12 | 6  | 2,38E-001 |
| Firmicutes      | Desulfotomaculum_carboxydivorans_CO-1-SRB_chromosome_NC_015565                         | IS5a | 8  | 6  | 2  | 2,89E-001 |
| Proteobacteria  | Desulfovibrio_alaskensis_G20_chromosome_NC_007519                                      | IS5a | 8  | 6  | 2  | 2,89E-001 |
| Firmicutes      | Staphylococcus_haemolyticus_JCSC1435_chromosome_NC_007168                              | IS5a | 24 | 15 | 9  | 3,07E-001 |
| Bacteroidetes   | Odoribacter_splanchnicus_DSM_20712_chromosome_NC_015160                                | IS5a | 21 | 8  | 13 | 3,83E-001 |
| Proteobacteria  | Acidiphilium_multivorum_AIU301_NC_015186                                               | IS5a | 7  | 5  | 2  | 4,53E-001 |
| Fusobacteria    | Fusobacterium_nucleatum_subsp._nucleatum_ATCC_25586_chromosome_NC_003454               | IS5a | 7  | 5  | 2  | 4,53E-001 |
| Proteobacteria  | Geobacter_metallireducens_GS-15_chromosome_NC_007517                                   | IS5a | 7  | 2  | 5  | 4,53E-001 |
| Firmicutes      | Caldicellulosiruptor_saccharolyticus_DSM_8903_chromosome_NC_009437                     | IS5a | 16 | 6  | 10 | 4,54E-001 |
| Proteobacteria  | Anaeromyxobacter_dehalogenans_2CP-1_chromosome_NC_011891                               | IS5a | 9  | 6  | 3  | 5,08E-001 |
| Proteobacteria  | Desulfococcus_oleovorans_Hxd3_chromosome_NC_009943                                     | IS5a | 9  | 6  | 3  | 5,08E-001 |
| Cyanobacteria   | Microcystis_aeruginosa_NIES-843_chromosome_NC_010296                                   | IS5a | 9  | 3  | 6  | 5,08E-001 |
| Firmicutes      | Lactobacillus_rhamnosus_GG_NC_013198                                                   | IS5a | 24 | 10 | 14 | 5,41E-001 |
| Proteobacteria  | Bradyrhizobium_japonicum_USDA_6_NC_017249                                              | IS5a | 11 | 4  | 7  | 5,49E-001 |
| Firmicutes      | Lactobacillus_plantarum_JDM1_NC_012984                                                 | IS5a | 11 | 7  | 4  | 5,49E-001 |
| Proteobacteria  | Desulfovibrio_magneticus_RS-1_NC_012796                                                | IS5a | 13 | 8  | 5  | 5,81E-001 |
| Acidobacteria   | Granulicella_tundricola_chromosome_NC_015064                                           | IS5a | 15 | 9  | 6  | 6,07E-001 |
| Spirochaetes    | Spirochaeta_caldaria_DSM_7334_chromosome_NC_015732                                     | IS5a | 17 | 7  | 10 | 6,29E-001 |
| Bacteroidetes   | Porphyromonas_gingivalis_ATCC_33277_NC_010729                                          | IS5a | 44 | 24 | 20 | 6,52E-001 |
| Proteobacteria  | Acidovorax_ebreus_TPSY_chromosome_NC_011992                                            | IS5a | 6  | 4  | 2  | 6,88E-001 |
| Proteobacteria  | Neisseria_gonorrhoeae_NCCP11945_chromosome_NC_011035                                   | IS5a | 6  | 2  | 4  | 6,88E-001 |
| Bacteroidetes   | Psychroflexus_torquis_ATCC_700755_chromosome_NC_018721                                 | IS5a | 6  | 4  | 2  | 6,88E-001 |
| Proteobacteria  | Rhodopseudomonas_palustris_BisB5_chromosome_NC_007958                                  | IS5a | 6  | 4  | 2  | 6,88E-001 |
| Proteobacteria  | Thiomonas_intermedia_K12_chromosome_NC_014153                                          | IS5a | 6  | 4  | 2  | 6,88E-001 |
| Proteobacteria  | Nitrobacter_hamburgensis_X14_chromosome_NC_007964                                      | IS5a | 27 | 15 | 12 | 7,01E-001 |
| Proteobacteria  | Acidovorax_sp._JS42_chromosome_NC_008782                                               | IS5a | 31 | 14 | 17 | 7,20E-001 |
| Proteobacteria  | Acidovorax_avenae_subsp._avenae_ATCC_19860_chromosome_NC_015138                        | IS5a | 8  | 5  | 3  | 7,27E-001 |
| Firmicutes      | Geobacillus_thermodenitrificans_NG80-2_chromosome_NC_009328                            | IS5a | 8  | 3  | 5  | 7,27E-001 |
| Firmicutes      | Lactobacillus_helveticus_DPC_4571_NC_010080                                            | IS5a | 8  | 3  | 5  | 7,27E-001 |
| Firmicutes      | Symbiobacterium_thermophilum_IAM_14863_chromosome_NC_006177                            | IS5a | 8  | 5  | 3  | 7,27E-001 |
| Spirochaetes    | Treponema_azotonutricium_ZAS-9_chromosome_NC_015577                                    | IS5a | 8  | 3  | 5  | 7,27E-001 |
| Firmicutes      | Desulfitobacterium_hafniense_DCB-2_chromosome_NC_011830                                | IS5a | 10 | 4  | 6  | 7,54E-001 |
| Proteobacteria  | Gluconacetobacter_diazotrophicus_PAI_5_uid59075_chromosome_NC_011365                   | IS5a | 10 | 6  | 4  | 7,54E-001 |
| Firmicutes      | Pelotomaculum_thermopropionicum_SI_chromosome_NC_009454                                | IS5a | 10 | 6  | 4  | 7,54E-001 |
| Proteobacteria  | Rhodospirillum_photometricum_DSM_122_NC_017059                                         | IS5a | 10 | 6  | 4  | 7,54E-001 |
| Proteobacteria  | Salmonella_enterica_subsp._enterica_serovar_Heidelberg_str._SL476_chromosome_NC_011083 | IS5a | 10 | 6  | 4  | 7,54E-001 |
| Firmicutes      | Syntrophomonas_wolfei_subsp._wolfei_str._Goettingen_chromosome_NC_008346               | IS5a | 12 | 7  | 5  | 7,74E-001 |
| Proteobacteria  | Aromatoleum_aromaticum_Ebn1_chromosome_NC_006513                                       | IS5a | 14 | 8  | 6  | 7,91E-001 |
| Proteobacteria  | Methylobium_petroleiphilum_PM1_chromosome_NC_008825                                    | IS5a | 14 | 6  | 8  | 7,91E-001 |
| Proteobacteria  | Acidithiobacillus_calidus_SM-1_chromosome_NC_015850                                    | IS5a | 30 | 16 | 14 | 8,56E-001 |
| Proteobacteria  | Xanthomonas_oryzae_pv._oryzae_KACC10331_chromosome_NC_006834                           | IS5a | 70 | 36 | 34 | 9,05E-001 |
| Bacteroidetes   | Bacteroides_vulgatus_ATCC_8482_chromosome_NC_009614                                    | IS5a | 18 | 9  | 9  | 1,00E+000 |
| Proteobacteria  | Burkholderia_pseudomallei_1106a_chromosome_chromosome_I_NC_009076                      | IS5a | 8  | 4  | 4  | 1,00E+000 |
| Proteobacteria  | Gluconacetobacter_xylinus_NBRC_3288_NC_016027                                          | IS5a | 20 | 10 | 10 | 1,00E+000 |
| Ignavibacteria  | Ignavibacterium_album_JCM_16511_chromosome_NC_017464                                   | IS5a | 6  | 3  | 3  | 1,00E+000 |
| Actinobacteria  | Mycobacterium_avium_subsp._paratuberculosis_K-10_NC_002944                             | IS5a | 6  | 3  | 3  | 1,00E+000 |
| Firmicutes      | Paenibacillus_mucilaginosus_3016_chromosome_NC_016935                                  | IS5a | 8  | 4  | 4  | 1,00E+000 |
| Proteobacteria  | Sinorhizobium_meliloti_AK83_chromosome_3_NC_015591                                     | IS5a | 6  | 3  | 3  | 1,00E+000 |
| Firmicutes      | Tetragenococcus_halophilus_NBRC_12172_NC_016052                                        | IS5a | 6  | 3  | 3  | 1,00E+000 |
| Cyanobacteria   | Acaryochloris_marina_MBIC11017_chromosome_NC_009925                                    | IS5a | 9  | 4  | 5  | 1,00E+000 |
| Firmicutes      | Alicyclobacillus_acidocaldarius_subsp._acidocaldarius_Tc-4-1_chromosome_NC_017167      | IS5a | 7  | 3  | 4  | 1,00E+000 |
| Proteobacteria  | Azotobacter_vinelandii_DJ_chromosome_NC_012560                                         | IS5a | 9  | 5  | 4  | 1,00E+000 |
| Firmicutes      | Bacillus_halodurans_C-125_chromosome_NC_002570                                         | IS5a | 7  | 4  | 3  | 1,00E+000 |
| Proteobacteria  | Bradyrhizobium_sp._ORS_278_chromosome_NC_009445                                        | IS5a | 13 | 7  | 6  | 1,00E+000 |
| Chlorobi        | Chlorobium_limicola_DSM_245_chromosome_NC_010803                                       | IS5a | 9  | 4  | 5  | 1,00E+000 |
| Firmicutes      | Clostridium_beijerinckii_NCIMB_8052_chromosome_NC_009617                               | IS5a | 9  | 4  | 5  | 1,00E+000 |
| Chloroflexi     | Dehalogenimonas_lykanthroporepellens_BL-DC-9_chromosome_NC_014314                      | IS5a | 11 | 6  | 5  | 1,00E+000 |

|                     |                                                                         |      |    |    |    |           |
|---------------------|-------------------------------------------------------------------------|------|----|----|----|-----------|
| Proteobacteria      | Desulfobulbus_propionicus_DSM_2032_chromosome_NC_014972                 | IS5a | 7  | 3  | 4  | 1,00E+000 |
| Proteobacteria      | Geobacter_lovleyi_SZ_chromosome_NC_010814                               | IS5a | 9  | 5  | 4  | 1,00E+000 |
| Proteobacteria      | Gluconobacter_oxydans_621H_chromosome_NC_006677                         | IS5a | 11 | 5  | 6  | 1,00E+000 |
| Firmicutes          | Lactobacillus_casei_ATCC_334_NC_008526                                  | IS5a | 11 | 5  | 6  | 1,00E+000 |
| Proteobacteria      | Pseudomonas_putida_S16_chromosome_NC_015733                             | IS5a | 11 | 5  | 6  | 1,00E+000 |
| Proteobacteria      | Pseudomonas_stutzeri_ATCC_17588 =_LMG_11199_chromosome_NC_015740        | IS5a | 9  | 5  | 4  | 1,00E+000 |
| Spirochaetes        | Spirochaeta_thermophila_DSM_6578_chromosome_NC_017583                   | IS5a | 9  | 4  | 5  | 1,00E+000 |
| Proteobacteria      | Methylococcus_capsulatus_str_Bath_chromosome_NC_002977                  | IS5a | 21 | 11 | 10 | 1,00E+000 |
| Proteobacteria      | Nitrosomonas_sp_AL212_chromosome_NC_015222                              | IS5a | 31 | 15 | 16 | 1,00E+000 |
| Proteobacteria      | Xanthomonas_campestris_pv_campestris_str_8004_chromosome_NC_007086      | IS5a | 25 | 12 | 13 | 1,00E+000 |
| Proteobacteria      | Brucella_melitensis_bv_1_str_16M_chromosome_I_NC_003317                 | IS5b | 11 | 11 | 0  | 9,77E-004 |
| Proteobacteria      | Brucella_suis_ATCC_23445_chromosome_chromosome_I_NC_010169              | IS5b | 10 | 10 | 0  | 1,95E-003 |
| Proteobacteria      | Brucella_abortus_S19_chromosome_chromosome_1_NC_010742                  | IS5b | 7  | 7  | 0  | 1,56E-002 |
| Proteobacteria      | Brucella_canis_ATCC_23365_chromosome_chromosome_I_NC_010103             | IS5b | 7  | 7  | 0  | 1,56E-002 |
| Deinococcus-Thermus | Truepera_radiovictrix_DSM_17093_chromosome_NC_014221                    | IS5b | 6  | 0  | 6  | 3,13E-002 |
| Proteobacteria      | Azospirillum_sp_B510_chromosome_NC_013854                               | IS5b | 15 | 3  | 12 | 3,52E-002 |
| Proteobacteria      | Stigmatella_aurantiaca_DW4/3-1_chromosome_NC_014623                     | IS5b | 15 | 12 | 3  | 3,52E-002 |
| Proteobacteria      | Collimonas_fungivorans_Ter331_chromosome_NC_015856                      | IS5b | 8  | 7  | 1  | 7,03E-002 |
| Cyanobacteria       | Synechococcus_sp_JA-2-3B'a(2-13)_chromosome_NC_007776                   | IS5b | 16 | 12 | 4  | 7,68E-002 |
| Proteobacteria      | Pseudomonas_syringae_pv_phaseolicola_1448A_chromosome_NC_005773         | IS5b | 31 | 20 | 11 | 1,50E-001 |
| Actinobacteria      | Frankia_sp_Ccl3_chromosome_NC_007777                                    | IS5b | 14 | 10 | 4  | 1,80E-001 |
| Actinobacteria      | Nocardia_farcinica_IFM_10152_chromosome_NC_006361                       | IS5b | 9  | 2  | 7  | 1,80E-001 |
| Proteobacteria      | Nitrobacter_winogradskyi_Nb-255_chromosome_NC_007406                    | IS5b | 30 | 19 | 11 | 2,00E-001 |
| Proteobacteria      | Brucella_microti_CCM_4915_chromosome_1_NC_013119                        | IS5b | 6  | 5  | 1  | 2,19E-001 |
| Chloroflexi         | Roseiflexus_sp_RS-1_chromosome_NC_009523                                | IS5b | 11 | 3  | 8  | 2,27E-001 |
| Actinobacteria      | Streptomyces_coelicolor_A3(2)_chromosome_NC_003888                      | IS5b | 11 | 3  | 8  | 2,27E-001 |
| Actinobacteria      | Kitasatospora_setae_KM-6054_NC_016109                                   | IS5b | 18 | 12 | 6  | 2,38E-001 |
| Proteobacteria      | Wolbachia_sp_wRi_NC_012416                                              | IS5b | 20 | 13 | 7  | 2,63E-001 |
| Chloroflexi         | Chloroflexus_aurantiacus_J-10-fl_chromosome_NC_010175                   | IS5b | 13 | 4  | 9  | 2,67E-001 |
| Chloroflexi         | Chloroflexus_sp_Y-400-fl_chromosome_NC_012032                           | IS5b | 13 | 4  | 9  | 2,67E-001 |
| Proteobacteria      | Burkholderia_cenocepacia_J2315_chromosome_chromosome_1_NC_011000        | IS5b | 8  | 2  | 6  | 2,89E-001 |
| Actinobacteria      | Corynebacterium_variabile_DSM_44702_chromosome_NC_015859                | IS5b | 8  | 6  | 2  | 2,89E-001 |
| Actinobacteria      | Streptomyces_bingchenggensis_BCW-1_chromosome_NC_016582                 | IS5b | 8  | 2  | 6  | 2,89E-001 |
| Proteobacteria      | Acidovorax_citrulli_AAC00-1_chromosome_NC_008752                        | IS5b | 15 | 10 | 5  | 3,02E-001 |
| Proteobacteria      | Delftia_acidovorans_SPH-1_chromosome_NC_010002                          | IS5b | 10 | 3  | 7  | 3,44E-001 |
| Actinobacteria      | Streptomyces_sp_SirexAA-E_chromosome_NC_015953                          | IS5b | 10 | 3  | 7  | 3,44E-001 |
| Proteobacteria      | Nitrosomonas_europaea_ATCC_19718_chromosome_NC_004757                   | IS5b | 19 | 7  | 12 | 3,59E-001 |
| Cyanobacteria       | Cyanothece_sp_PCC_7425_chromosome_NC_011884                             | IS5b | 12 | 8  | 4  | 3,88E-001 |
| Proteobacteria      | Bradyrhizobium_japonicum_USDA_110_chromosome_NC_004463                  | IS5b | 14 | 9  | 5  | 4,24E-001 |
| Cyanobacteria       | Trichodesmium_erythraeum_IMS101_chromosome_NC_008312                    | IS5b | 14 | 5  | 9  | 4,24E-001 |
| Actinobacteria      | Amycolatopsis_mediterranei_S699_chromosome_uid158689_NC_017186          | IS5b | 7  | 5  | 2  | 4,53E-001 |
| Proteobacteria      | Burkholderia_sp_CCGE1001_chromosome_1_NC_015136                         | IS5b | 7  | 5  | 2  | 4,53E-001 |
| Proteobacteria      | Methylophaga_sp_JAM1_chromosome_NC_017857                               | IS5b | 7  | 5  | 2  | 4,53E-001 |
| Proteobacteria      | Nitrosomonas_eutropha_C91_chromosome_NC_008344                          | IS5b | 7  | 5  | 2  | 4,53E-001 |
| Cyanobacteria       | Nostoc_sp_PCC_7120_chromosome_NC_003272                                 | IS5b | 7  | 2  | 5  | 4,53E-001 |
| Firmicutes          | Paenibacillus_terrae_HPL-003_chromosome_NC_016641                       | IS5b | 7  | 2  | 5  | 4,53E-001 |
| Chlamydiae          | Parachlamydia_acanthamoebae_UV7_NC_015702                               | IS5b | 7  | 5  | 2  | 4,53E-001 |
| Proteobacteria      | Ralstonia_solanacearum_GMI1000_chromosome_NC_003295                     | IS5b | 7  | 2  | 5  | 4,53E-001 |
| Actinobacteria      | Streptomyces_scabiei_87.22_chromosome_NC_013929                         | IS5b | 18 | 7  | 11 | 4,81E-001 |
| Actinobacteria      | Frankia_sp_EAN1pec_chromosome_NC_009921                                 | IS5b | 9  | 3  | 6  | 5,08E-001 |
| Firmicutes          | Lactobacillus_rhamnosus_GG_NC_013198                                    | IS5b | 9  | 6  | 3  | 5,08E-001 |
| Firmicutes          | Paenibacillus_polymyxa_E681_chromosome_NC_014483                        | IS5b | 9  | 6  | 3  | 5,08E-001 |
| Proteobacteria      | Nitrobacter_hamburgensis_X14_chromosome_NC_007964                       | IS5b | 11 | 7  | 4  | 5,49E-001 |
| Actinobacteria      | Pseudonocardia_dioxanivorans_CB1190_chromosome_NC_015312                | IS5b | 13 | 5  | 8  | 5,81E-001 |
| Proteobacteria      | Zymomonas_mobilis_subsp_mobilis_ATCC_10988_chromosome_NC_017262         | IS5b | 30 | 13 | 17 | 5,85E-001 |
| Proteobacteria      | Nitrospira_multiformis_ATCC_25196_chromosome_NC_007614                  | IS5b | 19 | 11 | 8  | 6,48E-001 |
| Proteobacteria      | Gluconacetobacter_xylinus_NBRC_3288_NC_016027                           | IS5b | 21 | 9  | 12 | 6,64E-001 |
| Proteobacteria      | Xenorhabdus_nematophila_ATCC_19061_chromosome_NC_014228                 | IS5b | 21 | 12 | 9  | 6,64E-001 |
| Proteobacteria      | Allochromatium_vinosum_DSM_180_chromosome_NC_013851                     | IS5b | 6  | 2  | 4  | 6,88E-001 |
| Deferribacteres     | Denitrovibrio_acetiphilus_DSM_12809_chromosome_NC_013943                | IS5b | 6  | 2  | 4  | 6,88E-001 |
| Fusobacteria        | Leptotrichia_buccalis_C-1013-b_chromosome_NC_013192                     | IS5b | 6  | 2  | 4  | 6,88E-001 |
| Proteobacteria      | Pelagibacterium_halotolerans_B2_chromosome_NC_016078                    | IS5b | 6  | 4  | 2  | 6,88E-001 |
| Proteobacteria      | Verminephrobacter_eiseniae_EF01-2_chromosome_NC_008786                  | IS5b | 6  | 4  | 2  | 6,88E-001 |
| Chlamydiae          | Waddlia_chondrophila_WSU_86-1044_chromosome_NC_014225                   | IS5b | 6  | 4  | 2  | 6,88E-001 |
| Proteobacteria      | Azorhizobium_caulinodans_OR_571_chromosome_NC_009937                    | IS5b | 8  | 3  | 5  | 7,27E-001 |
| Proteobacteria      | Azotobacter_vinelandii_DJ_chromosome_NC_012560                          | IS5b | 8  | 5  | 3  | 7,27E-001 |
| Bacteroidetes       | Spirosoma_linguale_DSM_74_chromosome_NC_013730                          | IS5b | 8  | 3  | 5  | 7,27E-001 |
| Cyanobacteria       | Thermosynechococcus_elongatus_BP-1_chromosome_NC_004113                 | IS5b | 8  | 3  | 5  | 7,27E-001 |
| Proteobacteria      | Xanthomonas_oryzae_pv_oryzae_KACC10331_chromosome_NC_006834             | IS5b | 80 | 42 | 38 | 7,38E-001 |
| Proteobacteria      | Acetobacter_pasteurianus_IFO_3283-01_NC_013209                          | IS5b | 10 | 4  | 6  | 7,54E-001 |
| Proteobacteria      | Bradyrhizobium_sp_BTAi1_chromosome_NC_009485                            | IS5b | 10 | 6  | 4  | 7,54E-001 |
| Proteobacteria      | Mesorhizobium_lotii_MAFF303099_chromosome_NC_002678                     | IS5b | 10 | 6  | 4  | 7,54E-001 |
| Proteobacteria      | Methylobacterium_extorquens_DM4_NC_012988                               | IS5b | 10 | 6  | 4  | 7,54E-001 |
| Proteobacteria      | Methylobacterium_populi_BJ001_chromosome_NC_010725                      | IS5b | 10 | 4  | 6  | 7,54E-001 |
| Bacteroidetes       | Emticicia_oligotrophica_DSM_17448_chromosome_NC_018748                  | IS5b | 18 | 10 | 8  | 8,15E-001 |
| Proteobacteria      | Francisella_tularensis_subsp_holarctica_FTNF002-00_chromosome_NC_009749 | IS5b | 28 | 15 | 13 | 8,51E-001 |
| Cyanobacteria       | Nostoc_azollae_0708_chromosome_NC_014248                                | IS5b | 32 | 15 | 17 | 8,60E-001 |
| Actinobacteria      | Saccharopolyspora_erythraea_NRR1_2338_chromosome_NC_009142              | IS5b | 34 | 16 | 18 | 8,64E-001 |
| Cyanobacteria       | Acaryochloris_marina_MBIC11017_chromosome_NC_009925                     | IS5b | 14 | 7  | 7  | 1,00E+000 |
| Proteobacteria      | Acidovorax_avenae_subsp_avenae_ATCC_19860_chromosome_NC_015138          | IS5b | 14 | 7  | 7  | 1,00E+000 |
| Proteobacteria      | Beijerinckia_indica_subsp_indica_ATCC_9039_chromosome_NC_010581         | IS5b | 6  | 3  | 3  | 1,00E+000 |
| Proteobacteria      | Burkholderia_glumae_BGR1_chromosome_chromosome_2_NC_012721              | IS5b | 6  | 3  | 3  | 1,00E+000 |
| Proteobacteria      | Burkholderia_thailandensis_E264_chromosome_chromosome_I_NC_007651       | IS5b | 6  | 3  | 3  | 1,00E+000 |
| Proteobacteria      | Burkholderia_vietnamiensis_G4_chromosome_3_NC_009254                    | IS5b | 6  | 3  | 3  | 1,00E+000 |

|                |                                                                           |      |    |    |    |           |
|----------------|---------------------------------------------------------------------------|------|----|----|----|-----------|
| Proteobacteria | Candidatus_Hamiltonella_defensa_5AT_(Acyrtosiphon_pisum)_NC_012751        | IS5b | 6  | 3  | 3  | 1,00E+000 |
| Chrysiogenetes | Desulfurispirillum_indicum_S5_chromosome_NC_014836                        | IS5b | 12 | 6  | 6  | 1,00E+000 |
| Planctomycetes | Planctomyces_brasiliensis_DSM_5305_chromosome_NC_015174                   | IS5b | 26 | 13 | 13 | 1,00E+000 |
| Proteobacteria | Shewanella_oneidensis_MR-1_chromosome_NC_004347                           | IS5b | 6  | 3  | 3  | 1,00E+000 |
| Actinobacteria | Streptomyces_violaceusniger_Tu_4113_chromosome_NC_015957                  | IS5b | 18 | 9  | 9  | 1,00E+000 |
| Proteobacteria | Xanthomonas_campestris_pv._campestris_str._B100_chromosome_NC_010688      | IS5b | 10 | 5  | 5  | 1,00E+000 |
| Proteobacteria | Acidiphilium_multivorum_AIU301_NC_015186                                  | IS5b | 11 | 5  | 6  | 1,00E+000 |
| Actinobacteria | Actinoplanes_sp._SE50/110_chromosome_NC_017803                            | IS5b | 11 | 5  | 6  | 1,00E+000 |
| Cyanobacteria  | Anabaena_variabilis_ATCC_29413_chromosome_NC_007413                       | IS5b | 9  | 4  | 5  | 1,00E+000 |
| Proteobacteria | Azospirillum_brasiliense_Sp245_NC_016617                                  | IS5b | 7  | 3  | 4  | 1,00E+000 |
| Proteobacteria | Corallococcus_coralloides_DSM_2259_chromosome_NC_017030                   | IS5b | 9  | 5  | 4  | 1,00E+000 |
| Actinobacteria | Geodermatophilus_obscurus_DSM_43160_chromosome_NC_013757                  | IS5b | 11 | 6  | 5  | 1,00E+000 |
| Proteobacteria | Gluconobacter_oxydans_621H_chromosome_NC_006677                           | IS5b | 13 | 6  | 7  | 1,00E+000 |
| Proteobacteria | Magnetospirillum_magneticum_AMB-1_chromosome_NC_007626                    | IS5b | 7  | 3  | 4  | 1,00E+000 |
| Proteobacteria | Methylobacterium_nodulans_ORIS_2060_chromosome_NC_011894                  | IS5b | 19 | 10 | 9  | 1,00E+000 |
| Actinobacteria | Micrococcus_luteus_NCTC_2665_NC_012803                                    | IS5b | 11 | 6  | 5  | 1,00E+000 |
| Planctomycetes | Pirellula_staleyii_DSM_6068_chromosome_NC_013720                          | IS5b | 9  | 4  | 5  | 1,00E+000 |
| Proteobacteria | Rhodobacter_sphaeroides_ATCC_17025_chromosome_NC_009428                   | IS5b | 7  | 4  | 3  | 1,00E+000 |
| Proteobacteria | Sphingobium_japonicum_UT26S_chromosome_1_NC_014006                        | IS5b | 7  | 4  | 3  | 1,00E+000 |
| Actinobacteria | Streptomyces_avermitilis_MA-4680_NC_003155                                | IS5b | 13 | 7  | 6  | 1,00E+000 |
| Actinobacteria | Streptomyces_griseus_subsp._griseus_NBRC_13350_chromosome_NC_010572       | IS5b | 9  | 5  | 4  | 1,00E+000 |
| Actinobacteria | Streptosporangium_roseum_DSM_43021_chromosome_NC_013595                   | IS5b | 11 | 6  | 5  | 1,00E+000 |
| Cyanobacteria  | Synechocystis_sp._PCC_6803_chromosome_NC_000911                           | IS5b | 19 | 10 | 9  | 1,00E+000 |
| Proteobacteria | Vibrio_harveyi_ATCC_BAA-1116_chromosome_chromosome_I_NC_009783            | IS5b | 13 | 6  | 7  | 1,00E+000 |
| Proteobacteria | Vibrio_harveyi_ATCC_BAA-1116_chromosome_chromosome_II_NC_009784           | IS5b | 7  | 4  | 3  | 1,00E+000 |
| Proteobacteria | Wolbachia_endosymbiont_of_Drosophila_melanogaster_NC_002978               | IS5b | 13 | 6  | 7  | 1,00E+000 |
| Proteobacteria | Xenorhabdus_bovienii_SS-2004_chromosome_NC_013892                         | IS5b | 15 | 8  | 7  | 1,00E+000 |
| Proteobacteria | Gluconacetobacter_diazotrophicus_PAI_5_uid59075_chromosome_NC_011365      | IS5b | 21 | 11 | 10 | 1,00E+000 |
| Bacteroidetes  | Candidatus_Amoebophilus_asiaticus_5a2_chromosome_NC_010830                | IS5b | 25 | 13 | 12 | 1,00E+000 |
| Actinobacteria | Streptomyces_hygroscopicus_subsp._jinggagensis_5008_chromosome_NC_017765  | IS5b | 23 | 12 | 11 | 1,00E+000 |
| Proteobacteria | Desulfovibrio_africanus_str._Walvis_Bay_chromosome_NC_016629              | IS5b | 27 | 13 | 14 | 1,00E+000 |
| Cyanobacteria  | Acaryochloris_marina_MBIC11017_chromosome_NC_009925                       | IS5c | 9  | 2  | 7  | 1,80E-001 |
| Proteobacteria | Acinetobacter_baumannii_1656-2_chromosome_NC_017162                       | IS5c | 24 | 15 | 9  | 3,07E-001 |
| Proteobacteria | Comamonas_testosteroni_CNB-2_chromosome_NC_013446                         | IS5c | 10 | 3  | 7  | 3,44E-001 |
| Proteobacteria | Citrobacter_rodentium_ICC168_NC_013716                                    | IS5c | 12 | 4  | 8  | 3,88E-001 |
| Proteobacteria | Vibrio_harveyi_ATCC_BAA-1116_chromosome_chromosome_II_NC_009784           | IS5c | 15 | 6  | 9  | 6,07E-001 |
| Proteobacteria | Enterobacter_cloacae_subsp._cloacae_ATCC_13047_chromosome_NC_014121       | IS5c | 19 | 11 | 8  | 6,48E-001 |
| Proteobacteria | Sodalis_glossinidius_str._'morsitans'_chromosome_NC_007712                | IS5c | 16 | 9  | 7  | 8,04E-001 |
| Bacteroidetes  | Runella_slithyformis_DSM_19594_chromosome_NC_015703                       | IS5c | 8  | 4  | 4  | 1,00E+000 |
| Proteobacteria | Klebsiella_pneumoniae_subsp._pneumoniae_HS11286_chromosome_NC_016845      | IS5c | 7  | 4  | 3  | 1,00E+000 |
| Proteobacteria | Shewanella_baltica_OS117_chromosome_NC_017579                             | IS5c | 7  | 4  | 3  | 1,00E+000 |
| Cyanobacteria  | Trichodesmium_erythraeum_IMS101_chromosome_NC_008312                      | IS5c | 13 | 7  | 6  | 1,00E+000 |
| Proteobacteria | Vibrio_anguillarum_775_chromosome_chromosome_I_NC_015633                  | IS5c | 11 | 6  | 5  | 1,00E+000 |
| Proteobacteria | Vibrio_harveyi_ATCC_BAA-1116_chromosome_chromosome_I_NC_009783            | IS5c | 9  | 4  | 5  | 1,00E+000 |
| Firmicutes     | Streptococcus_pneumoniae_70585_NC_012468                                  | IS5d | 33 | 23 | 10 | 3,51E-002 |
| Cyanobacteria  | Nostoc_punctiforme_PCC_73102_chromosome_NC_010628                         | IS5d | 24 | 17 | 7  | 6,39E-002 |
| Cyanobacteria  | Microcystis_aeruginosa_NIES-843_chromosome_NC_010296                      | IS5d | 38 | 15 | 23 | 2,56E-001 |
| Bacteroidetes  | Candidatus_Amoebophilus_asiaticus_5a2_chromosome_NC_010830                | IS5d | 57 | 33 | 24 | 2,89E-001 |
| Firmicutes     | Streptococcus_pseudopneumoniae_IS7493_chromosome_NC_015875                | IS5d | 10 | 7  | 3  | 3,44E-001 |
| Firmicutes     | Streptococcus_agalactiae_GD201008-001_chromosome_NC_018646                | IS5d | 12 | 8  | 4  | 3,88E-001 |
| Actinobacteria | Micromonospora_aurantiaca_ATCC_27029_chromosome_NC_014391                 | IS5d | 7  | 2  | 5  | 4,53E-001 |
| Actinobacteria | Streptomyces_coelicolor_A3(2)_chromosome_NC_003888                        | IS5d | 7  | 2  | 5  | 4,53E-001 |
| Actinobacteria | Geodermatophilus_obscurus_DSM_43160_chromosome_NC_013757                  | IS5d | 9  | 6  | 3  | 5,08E-001 |
| Actinobacteria | Frankia_sp._Ccl3_chromosome_NC_007777                                     | IS5d | 13 | 5  | 8  | 5,81E-001 |
| Proteobacteria | Orientia_tsutsugamushi_str._lkeda_NC_010793                               | IS5d | 55 | 30 | 25 | 5,90E-001 |
| Actinobacteria | Micromonospora_sp._L5_chromosome_NC_014815                                | IS5d | 6  | 4  | 2  | 6,88E-001 |
| Actinobacteria | Actinosynnema_mirum_DSM_43827_chromosome_NC_013093                        | IS5d | 8  | 3  | 5  | 7,27E-001 |
| Chloroflexi    | Roseiflexus_sp._RS-1_chromosome_NC_009523                                 | IS5d | 22 | 11 | 11 | 1,00E+000 |
| Cyanobacteria  | Cyanothece_sp._ATCC_51142_chromosome_chromosome_circular_NC_010546        | IS5d | 15 | 8  | 7  | 1,00E+000 |
| Cyanobacteria  | Nostoc_azollae_0708_chromosome_NC_014248                                  | IS5d | 9  | 4  | 5  | 1,00E+000 |
| Actinobacteria | Streptomyces_hygroscopicus_subsp._jinggagensis_5008_chromosome_NC_017765  | IS5d | 13 | 7  | 6  | 1,00E+000 |
| Cyanobacteria  | Trichodesmium_erythraeum_IMS101_chromosome_NC_008312                      | IS5d | 49 | 25 | 24 | 1,00E+000 |
| Firmicutes     | Clostridium_botulinum_BKT015925_chromosome_NC_015425                      | IS6  | 23 | 5  | 18 | 1,06E-002 |
| Firmicutes     | Tetragenococcus_halophilus_NBRC_12172_NC_016052                           | IS6  | 10 | 2  | 8  | 1,09E-001 |
| Proteobacteria | Novosphingobium_aromaticivorans_DSM_12444_chromosome_NC_007794            | IS6  | 7  | 6  | 1  | 1,25E-001 |
| Firmicutes     | Staphylococcus_aureus_subsp._aureus_str._JKD6008_chromosome_NC_017341     | IS6  | 7  | 1  | 6  | 1,25E-001 |
| Firmicutes     | Clostridium_perfringens_SM101_chromosome_NC_008262                        | IS6  | 12 | 3  | 9  | 1,46E-001 |
| Thermotogae    | Fervidobacterium_pennivorans_DSM_9078_chromosome_NC_017095                | IS6  | 24 | 8  | 16 | 1,52E-001 |
| Proteobacteria | Photobacterium_profundum_SS9_chromosome_2_NC_006371                       | IS6  | 9  | 7  | 2  | 1,80E-001 |
| Proteobacteria | Acinetobacter_baumannii_1656-2_chromosome_NC_017162                       | IS6  | 6  | 1  | 5  | 2,19E-001 |
| Firmicutes     | Streptococcus_macedonicus_ACA-DC_198_NC_016749                            | IS6  | 6  | 1  | 5  | 2,19E-001 |
| Firmicutes     | Natranaerobius_thermophilus_JW/NM-WN-LF_chromosome_NC_010718              | IS6  | 11 | 3  | 8  | 2,27E-001 |
| Firmicutes     | Staphylococcus_haemolyticus_JCSC1435_chromosome_NC_007168                 | IS6  | 9  | 3  | 6  | 5,08E-001 |
| Proteobacteria | Xenorhabdus_nematophila_ATCC_19061_chromosome_NC_014228                   | IS6  | 11 | 4  | 7  | 5,49E-001 |
| Thermotogae    | Fervidobacterium_nodosum_Rt17-B1_chromosome_NC_009718                     | IS6  | 23 | 13 | 10 | 6,78E-001 |
| Proteobacteria | Agrobacterium_radiobacter_K84_chromosome_2_NC_011983                      | IS6  | 6  | 2  | 4  | 6,88E-001 |
| Proteobacteria | Wolbachia_endosymbiont_of_Culex_quinquefasciatus_Pel_chromosome_NC_010981 | IS6  | 6  | 2  | 4  | 6,88E-001 |
| Actinobacteria | Frankia_sp._Ccl3_chromosome_NC_007777                                     | IS6  | 10 | 6  | 4  | 7,54E-001 |
| Actinobacteria | Corynebacterium_diphtheriae_BH8_chromosome_NC_016800                      | IS6  | 6  | 3  | 3  | 1,00E+000 |
| Actinobacteria | Corynebacterium_glutamicum_ATCC_13032_uid61611_NC_006958                  | IS6  | 6  | 3  | 3  | 1,00E+000 |
| Proteobacteria | Klebsiella_oxytoca_E718_chromosome_NC_018106                              | IS6  | 8  | 4  | 4  | 1,00E+000 |
| Proteobacteria | Sphingobium_japonicum_UT26S_chromosome_1_NC_014006                        | IS6  | 6  | 3  | 3  | 1,00E+000 |
| Proteobacteria | Bradyrhizobium_japonicum_USDA_110_chromosome_NC_004463                    | IS6  | 11 | 6  | 5  | 1,00E+000 |
| Actinobacteria | Corynebacterium_resistens_DSM_45100_chromosome_NC_015673                  | IS6  | 7  | 3  | 4  | 1,00E+000 |



|                 |                                                                                   |       |     |    |    |           |
|-----------------|-----------------------------------------------------------------------------------|-------|-----|----|----|-----------|
| Firmicutes      | Thermoanaerobacter_tengcongensis_MB4_NC_003869                                    | IS6   | 7   | 3  | 4  | 1,00E+000 |
| Proteobacteria  | Xenorhabdus_bovienii_SS-2004_chromosome_NC_013892                                 | IS6   | 11  | 6  | 5  | 1,00E+000 |
| Firmicutes      | Desulfotomaculum_kuznetsovii_DSM_6115_chromosome_NC_015573                        | IS607 | 10  | 10 | 0  | 1,95E-003 |
| Firmicutes      | Lactobacillus_helveticus_DPC_4571_NC_010080                                       | IS607 | 7   | 7  | 0  | 1,56E-002 |
| Firmicutes      | Thermoanaerobacter_tengcongensis_MB4_NC_003869                                    | IS607 | 7   | 7  | 0  | 1,56E-002 |
| Firmicutes      | Lactobacillus_crispatus_ST1_NC_014106                                             | IS607 | 6   | 6  | 0  | 3,13E-002 |
| Actinobacteria  | Mycobacterium_bovis_BCG_str._Tokyo_172_NC_012207                                  | IS607 | 6   | 6  | 0  | 3,13E-002 |
| Actinobacteria  | Mycobacterium_tuberculosis_CCDC5079_chromosome_NC_017523                          | IS607 | 6   | 6  | 0  | 3,13E-002 |
| Firmicutes      | Alicyclobacillus_acidocaldarius_subsp._acidocaldarius_Tc-4-1_chromosome_NC_017167 | IS607 | 7   | 1  | 6  | 1,25E-001 |
| Firmicutes      | Selenomonas_ruminantium_subsp._lactilytica_TAM6421_NC_017068                      | IS607 | 8   | 6  | 2  | 2,89E-001 |
| Firmicutes      | Ammonifex_degensii_KC4_chromosome_NC_013385                                       | IS607 | 12  | 8  | 4  | 3,88E-001 |
| Firmicutes      | Desulfotomaculum_carboxydivorans_CO-1-SRB_chromosome_NC_015565                    | IS607 | 7   | 5  | 2  | 4,53E-001 |
| Firmicutes      | Lactobacillus_kefiranofaciens_ZW3_chromosome_NC_015602                            | IS607 | 7   | 5  | 2  | 4,53E-001 |
| Cyanobacteria   | Synechococcus_sp._JA-3-3Ab_chromosome_NC_007775                                   | IS607 | 20  | 8  | 12 | 5,03E-001 |
| Firmicutes      | Kyrpidia_tusciae_DSM_2912_chromosome_NC_014098                                    | IS607 | 11  | 7  | 4  | 5,49E-001 |
| Verrucomicrobia | Methylacidiphilum_inferorum_V4_NC_010794                                          | IS607 | 6   | 2  | 4  | 6,88E-001 |
| Proteobacteria  | Helicobacter_pylori_Shi169_chromosome_NC_017740                                   | IS607 | 6   | 3  | 3  | 1,00E+000 |
| Firmicutes      | Lactobacillus_delbrueckii_subsp._bulgaricus_ND02_chromosome_NC_014727             | IS607 | 11  | 6  | 5  | 1,00E+000 |
| Cyanobacteria   | Microcystis_aeruginosa_NIES-843_chromosome_NC_010296                              | IS607 | 7   | 3  | 4  | 1,00E+000 |
| Proteobacteria  | Vibrio_harveyi_ATCC_BAA-1116_chromosome_chromosome_I_NC_009783                    | IS630 | 36  | 9  | 27 | 3,93E-003 |
| Proteobacteria  | Photobacterium_profundum_SS9_chromosome_1_NC_006370                               | IS630 | 16  | 2  | 14 | 4,18E-003 |
| Proteobacteria  | Photobacterium_profundum_SS9_chromosome_2_NC_006371                               | IS630 | 18  | 4  | 14 | 3,09E-002 |
| Proteobacteria  | Bradyrhizobium_japonicum_USDA_110_chromosome_NC_004463                            | IS630 | 19  | 14 | 5  | 6,36E-002 |
| Firmicutes      | Streptococcus_pneumoniae_670-6B_chromosome_NC_014498                              | IS630 | 15  | 11 | 4  | 1,18E-001 |
| Planctomycetes  | Phycisphaera_mikurensis_NBRC_102666_NC_017080                                     | IS630 | 7   | 6  | 1  | 1,25E-001 |
| Proteobacteria  | Psychromonas_ingrahamii_37_chromosome_NC_008709                                   | IS630 | 7   | 1  | 6  | 1,25E-001 |
| Proteobacteria  | Photorhabdus_luminescens_subsp._laumondii_TTO1_NC_005126                          | IS630 | 43  | 27 | 16 | 1,26E-001 |
| Proteobacteria  | Aliivibrio_salmonicida_LF11238_chromosome_chromosome_1_NC_011312                  | IS630 | 17  | 5  | 12 | 1,43E-001 |
| Cyanobacteria   | Synechocystis_sp._PCC_6803_substr._PCC-P_NC_017039                                | IS630 | 28  | 18 | 10 | 1,85E-001 |
| Proteobacteria  | Azotobacter_vinelandii_DJ_chromosome_NC_012560                                    | IS630 | 16  | 5  | 11 | 2,10E-001 |
| Bacteroidetes   | Salinibacter_ruber_M8_chromosome_NC_014032                                        | IS630 | 6   | 5  | 1  | 2,19E-001 |
| Actinobacteria  | Gordonia_bronchialis_DSM_43247_chromosome_NC_013441                               | IS630 | 11  | 3  | 8  | 2,27E-001 |
| Actinobacteria  | Frankia_sp._Ccl3_chromosome_NC_007777                                             | IS630 | 13  | 4  | 9  | 2,67E-001 |
| Proteobacteria  | Nitrosococcus_watsonii_C-113_chromosome_NC_014315                                 | IS630 | 13  | 4  | 9  | 2,67E-001 |
| Proteobacteria  | Aeromonas_salmonicida_subsp._salmonicida_A449_NC_009348                           | IS630 | 31  | 12 | 19 | 2,81E-001 |
| Proteobacteria  | Photorhabdus_asymbiotica_subsp._asymbiotica_ATCC_43949_chromosome_NC_012962       | IS630 | 8   | 6  | 2  | 2,89E-001 |
| Chlamydiae      | Waddlia_chondrophila_WSU_86-1044_chromosome_NC_014225                             | IS630 | 8   | 2  | 6  | 2,89E-001 |
| Proteobacteria  | Candidatus_Hamiltonella_defensa_5AT_(Acyrtosiphon_pisum)_NC_012751                | IS630 | 26  | 10 | 16 | 3,27E-001 |
| Proteobacteria  | Aliivibrio_salmonicida_LF11238_chromosome_chromosome_2_NC_011313                  | IS630 | 10  | 3  | 7  | 3,44E-001 |
| Proteobacteria  | Erwinia_pyrifoliae_DSM_12163_NC_017390                                            | IS630 | 10  | 3  | 7  | 3,44E-001 |
| Proteobacteria  | Rhodomicrobium_vannielii_ATCC_17100_chromosome_NC_014664                          | IS630 | 10  | 3  | 7  | 3,44E-001 |
| Proteobacteria  | Hahella_chejuensis_KCTC_2396_chromosome_NC_007645                                 | IS630 | 12  | 8  | 4  | 3,88E-001 |
| Bacteroidetes   | Runella_slithyformis_DSM_19594_chromosome_NC_015703                               | IS630 | 12  | 4  | 8  | 3,88E-001 |
| Actinobacteria  | Streptomyces_hygroscopicus_subsp._jinggangensis_5008_chromosome_NC_017765         | IS630 | 12  | 4  | 8  | 3,88E-001 |
| Actinobacteria  | Frankia_sp._EAN1pec_chromosome_NC_009921                                          | IS630 | 23  | 14 | 9  | 4,05E-001 |
| Cyanobacteria   | Nostoc_sp._PCC_7120_chromosome_NC_003272                                          | IS630 | 14  | 5  | 9  | 4,24E-001 |
| Chlamydiae      | Candidatus_Protoclamydia_amoebophila_UWE25_chromosome_NC_005861                   | IS630 | 7   | 2  | 5  | 4,53E-001 |
| Bacteroidetes   | Flavobacterium_columnare_ATCC_49512_chromosome_NC_016510                          | IS630 | 7   | 5  | 2  | 4,53E-001 |
| Proteobacteria  | Gluconacetobacter_xylinus_NBRC_3288_NC_016027                                     | IS630 | 7   | 5  | 2  | 4,53E-001 |
| Bacteroidetes   | Spirosoma_linguale_DSM_74_chromosome_NC_013730                                    | IS630 | 7   | 5  | 2  | 4,53E-001 |
| Proteobacteria  | Stigmatella_aurantiaca_DW4/3-1_chromosome_NC_014623                               | IS630 | 7   | 5  | 2  | 4,53E-001 |
| Actinobacteria  | Streptomyces_scabiei_87.22_chromosome_NC_013929                                   | IS630 | 7   | 5  | 2  | 4,53E-001 |
| Proteobacteria  | Nitrosomonas_sp._Is79A3_chromosome_NC_015731                                      | IS630 | 16  | 10 | 6  | 4,54E-001 |
| Cyanobacteria   | Synechococcus_sp._JA-3-3Ab_chromosome_NC_007775                                   | IS630 | 16  | 6  | 10 | 4,54E-001 |
| Proteobacteria  | Gluconacetobacter_diazotrophicus_PAI_5_uid59075_chromosome_NC_011365              | IS630 | 18  | 11 | 7  | 4,81E-001 |
| Firmicutes      | Desulfotomaculum_acetoxidans_DSM_771_chromosome_NC_013216                         | IS630 | 33  | 19 | 14 | 4,87E-001 |
| Cyanobacteria   | Nostoc_punctiforme_PCC_73102_chromosome_NC_010628                                 | IS630 | 20  | 12 | 8  | 5,03E-001 |
| Cyanobacteria   | Microcystis_aeruginosa_NIES-843_chromosome_NC_010296                              | IS630 | 116 | 62 | 54 | 5,16E-001 |
| Proteobacteria  | Xenorhabdus_nematophila_ATCC_19061_chromosome_NC_014228                           | IS630 | 91  | 49 | 42 | 5,30E-001 |
| Proteobacteria  | Xenorhabdus_bovienii_SS-2004_chromosome_NC_013892                                 | IS630 | 43  | 19 | 24 | 5,42E-001 |
| Bacteroidetes   | Haliscomenobacter_hydrossis_DSM_1100_chromosome_NC_015510                         | IS630 | 11  | 4  | 7  | 5,49E-001 |
| Proteobacteria  | Nitrobacter_winogradskyi_Nb-255_chromosome_NC_007406                              | IS630 | 28  | 12 | 16 | 5,72E-001 |
| Firmicutes      | Streptococcus_pseudopneumoniae_IS7493_chromosome_NC_015875                        | IS630 | 13  | 8  | 5  | 5,81E-001 |
| Proteobacteria  | Xanthomonas_oryzae_pv._oryzae_KACC10331_chromosome_NC_006834                      | IS630 | 34  | 19 | 15 | 6,08E-001 |
| Proteobacteria  | Acidovorax_sp._JS42_chromosome_NC_008782                                          | IS630 | 19  | 8  | 11 | 6,48E-001 |
| Proteobacteria  | Polaromonas_naphthalenivorans_CJ2_chromosome_NC_008781                            | IS630 | 19  | 8  | 11 | 6,48E-001 |
| Proteobacteria  | Orientia_tsutsugamushi_str._lkeda_NC_010793                                       | IS630 | 44  | 24 | 20 | 6,52E-001 |
| Cyanobacteria   | Cyanothece_sp._ATCC_51142_chromosome_chromosome_circular_NC_010546                | IS630 | 21  | 12 | 9  | 6,64E-001 |
| Proteobacteria  | Alicyclophilus_denitrificans_K601_chromosome_NC_015422                            | IS630 | 6   | 2  | 4  | 6,88E-001 |
| Firmicutes      | Clostridium_lentocellum_DSM_5427_chromosome_NC_015275                             | IS630 | 6   | 2  | 4  | 6,88E-001 |
| Proteobacteria  | Legionella_pneumophila_str._Lens_NC_006369                                        | IS630 | 6   | 2  | 4  | 6,88E-001 |
| Actinobacteria  | Salinispora_arenicola_CNS-205_chromosome_NC_009953                                | IS630 | 6   | 4  | 2  | 6,88E-001 |
| Actinobacteria  | Salinispora_tropica_CNB-440_chromosome_NC_009380                                  | IS630 | 6   | 2  | 4  | 6,88E-001 |
| Actinobacteria  | Streptomyces_violaceusniger_Tu_4113_chromosome_NC_015957                          | IS630 | 6   | 2  | 4  | 6,88E-001 |
| Cyanobacteria   | Acaryochloris_marina_MBIC11017_chromosome_NC_009925                               | IS630 | 58  | 27 | 31 | 6,94E-001 |
| Proteobacteria  | Edwardsiella_ictaluri_93-146_chromosome_NC_012779                                 | IS630 | 8   | 3  | 5  | 7,27E-001 |
| Proteobacteria  | Shewanella_oneidensis_MR-1_chromosome_NC_004347                                   | IS630 | 8   | 5  | 3  | 7,27E-001 |
| Chlorobi        | Chlorobium_phaeobacteroides_DSM_266_chromosome_NC_008639                          | IS630 | 10  | 4  | 6  | 7,54E-001 |
| Actinobacteria  | Mycobacterium_smegmatis_str._MC2_155_chromosome_NC_018289                         | IS630 | 10  | 4  | 6  | 7,54E-001 |
| Chloroflexi     | Roseiflexus_sp._RS-1_chromosome_NC_009523                                         | IS630 | 10  | 6  | 4  | 7,54E-001 |
| Proteobacteria  | Nitrosomonas_eutropha_C91_chromosome_NC_008344                                    | IS630 | 12  | 7  | 5  | 7,74E-001 |
| Chloroflexi     | Caldilinea_aerophila_DSM_14535_=_NBRC_104270_NC_017079                            | IS630 | 16  | 9  | 7  | 8,04E-001 |
| Cyanobacteria   | Trichodesmium_erythraeum_IMS101_chromosome_NC_008312                              | IS630 | 69  | 36 | 33 | 8,10E-001 |
| Bacteroidetes   | Psychroflexus_torquis_ATCC_700755_chromosome_NC_018721                            | IS630 | 26  | 12 | 14 | 8,45E-001 |

|                |                                                                                   |       |    |    |    |           |
|----------------|-----------------------------------------------------------------------------------|-------|----|----|----|-----------|
| Proteobacteria | Caulobacter_sp._K31_chromosome_NC_010338                                          | IS630 | 8  | 4  | 4  | 1,00E+000 |
| Actinobacteria | Frankia_symbiont_of_Datisca_glomerata_chromosome_NC_015656                        | IS630 | 58 | 29 | 29 | 1,00E+000 |
| Cyanobacteria  | Gloeobacter_violaceus_PCC_7421_chromosome_NC_005125                               | IS630 | 6  | 3  | 3  | 1,00E+000 |
| Actinobacteria | Kitasatospora_setae_KM-6054_NC_016109                                             | IS630 | 6  | 3  | 3  | 1,00E+000 |
| Proteobacteria | Methylomonas_methanica_MC09_chromosome_NC_015572                                  | IS630 | 10 | 5  | 5  | 1,00E+000 |
| Proteobacteria | Neisseria_gonorrhoeae_NCCP11945_chromosome_NC_011035                              | IS630 | 8  | 4  | 4  | 1,00E+000 |
| Actinobacteria | Saccharopolyspora_erythraea_NRRL_2338_chromosome_NC_009142                        | IS630 | 14 | 7  | 7  | 1,00E+000 |
| Proteobacteria | Shewanella_frigidimarina_NCIMB_400_chromosome_NC_008345                           | IS630 | 8  | 4  | 4  | 1,00E+000 |
| Proteobacteria | Shigella_sonnei_53G_NC_016822                                                     | IS630 | 12 | 6  | 6  | 1,00E+000 |
| Proteobacteria | Sinorhizobium_fredii_HH103_NC_016812                                              | IS630 | 8  | 4  | 4  | 1,00E+000 |
| Proteobacteria | Sinorhizobium_meliloti_1021_NC_003047                                             | IS630 | 6  | 3  | 3  | 1,00E+000 |
| Proteobacteria | Sphingobium_japonicum_UT26S_chromosome_1_NC_014006                                | IS630 | 6  | 3  | 3  | 1,00E+000 |
| Firmicutes     | Streptococcus_suis_98HAH33_NC_009443                                              | IS630 | 6  | 3  | 3  | 1,00E+000 |
| Proteobacteria | Verminephrobacter_eiseniae_EF01-2_chromosome_NC_008786                            | IS630 | 22 | 11 | 11 | 1,00E+000 |
| Cyanobacteria  | Anabaena_variabilis_ATCC_29413_chromosome_NC_007413                               | IS630 | 11 | 5  | 6  | 1,00E+000 |
| Firmicutes     | Anoxybacillus_flavithermus_WK1_chromosome_NC_011567                               | IS630 | 9  | 5  | 4  | 1,00E+000 |
| Bacteroidetes  | Flexibacter_litoralis_DSM_6794_chromosome_NC_018018                               | IS630 | 7  | 4  | 3  | 1,00E+000 |
| Proteobacteria | Methylobacterium_nodulans_ORIS_2060_chromosome_NC_011894                          | IS630 | 15 | 8  | 7  | 1,00E+000 |
| Proteobacteria | Methylobacterium_sp._4-46_chromosome_NC_010511                                    | IS630 | 7  | 4  | 3  | 1,00E+000 |
| Proteobacteria | Nitrobacter_hamburgensis_X14_chromosome_NC_007964                                 | IS630 | 15 | 8  | 7  | 1,00E+000 |
| Proteobacteria | Nitrosococcus_halophilus_Nc4_chromosome_NC_013960                                 | IS630 | 9  | 5  | 4  | 1,00E+000 |
| Chlorobi       | Pelodictyon_phaeoclathratiforme_BU-1_chromosome_NC_011060                         | IS630 | 9  | 5  | 4  | 1,00E+000 |
| Proteobacteria | Shewanella_putrefaciens_200_chromosome_NC_017566                                  | IS630 | 9  | 4  | 5  | 1,00E+000 |
| Proteobacteria | Sphingobium_sp._SYK-6_NC_015976                                                   | IS630 | 9  | 4  | 5  | 1,00E+000 |
| Actinobacteria | Streptomyces_avermitilis_MA-4680_NC_003155                                        | IS630 | 9  | 4  | 5  | 1,00E+000 |
| Actinobacteria | Streptosporangium_roseum_DSM_43021_chromosome_NC_013595                           | IS630 | 11 | 6  | 5  | 1,00E+000 |
| Proteobacteria | Nitrosococcus_oceani_ATCC_19707_chromosome_NC_007484                              | IS630 | 23 | 12 | 11 | 1,00E+000 |
| Proteobacteria | Francisella_tularensis_subsp._holarctica_FTNF002-00_chromosome_NC_009749          | IS630 | 57 | 29 | 28 | 1,00E+000 |
| Proteobacteria | Escherichia_coli_ETEC_H10407_NC_017633                                            | IS66a | 16 | 13 | 3  | 2,13E-002 |
| Firmicutes     | Clostridium_clariflavum_DSM_19732_chromosome_NC_016627                            | IS66a | 10 | 9  | 1  | 2,15E-002 |
| Proteobacteria | Acidithiobacillus_calidus_SM-1_chromosome_NC_015850                               | IS66a | 6  | 6  | 0  | 3,13E-002 |
| Firmicutes     | Lactobacillus_amylovorus_GRL_1112_chromosome_NC_014724                            | IS66a | 8  | 1  | 7  | 7,03E-002 |
| Proteobacteria | Vibrio_harveyi_ATCC_BAA-1116_chromosome_chromosome_II_NC_009784                   | IS66a | 23 | 16 | 7  | 9,31E-002 |
| Proteobacteria | Pseudomonas_syringae_pv._tomato_str._DC3000_chromosome_NC_004578                  | IS66a | 35 | 22 | 13 | 1,75E-001 |
| Proteobacteria | Desulfobacula_toluolica_Tol2_NC_018645                                            | IS66a | 14 | 4  | 10 | 1,80E-001 |
| Proteobacteria | Rhodomicrobium_vannielii_ATCC_17100_chromosome_NC_014664                          | IS66a | 14 | 4  | 10 | 1,80E-001 |
| Proteobacteria | Desulfatibacillum_alkenivorans_AK-01_chromosome_NC_011768                         | IS66a | 9  | 7  | 2  | 1,80E-001 |
| Proteobacteria | Desulfovibrio_magneticus_RS-1_NC_012796                                           | IS66a | 9  | 7  | 2  | 1,80E-001 |
| Proteobacteria | Gamma_proteobacterium_HdN1_chromosome_NC_014366                                   | IS66a | 6  | 1  | 5  | 2,19E-001 |
| Proteobacteria | Photobacterium_profundum_SS9_chromosome_2_NC_006371                               | IS66a | 6  | 5  | 1  | 2,19E-001 |
| Proteobacteria | Stigmatella_aurantiaca_DW4/3-1_chromosome_NC_014623                               | IS66a | 11 | 3  | 8  | 2,27E-001 |
| Proteobacteria | Citrobacter_rodentium_ICC168_NC_013716                                            | IS66a | 22 | 8  | 14 | 2,86E-001 |
| Proteobacteria | Magnetococcus_sp._MC-1_chromosome_NC_008576                                       | IS66a | 17 | 11 | 6  | 3,32E-001 |
| Firmicutes     | Ethanoligenens_harbinense_YUAN-3_chromosome_NC_014828                             | IS66a | 10 | 7  | 3  | 3,44E-001 |
| Proteobacteria | Sinorhizobium_fredii_USDA_257_chromosome_NC_018000                                | IS66a | 10 | 3  | 7  | 3,44E-001 |
| Proteobacteria | Alicyclophilus_denitrificans_K601_chromosome_NC_015422                            | IS66a | 7  | 5  | 2  | 4,53E-001 |
| Proteobacteria | Burkholderia_thailandensis_E264_chromosome_chromosome_I_NC_007651                 | IS66a | 7  | 5  | 2  | 4,53E-001 |
| Proteobacteria | Gluconacetobacter_xylinus_NBRC_3288_NC_016027                                     | IS66a | 7  | 5  | 2  | 4,53E-001 |
| Proteobacteria | Shigella_flexneri_2a_str._2457T_NC_004741                                         | IS66a | 7  | 5  | 2  | 4,53E-001 |
| Proteobacteria | Sinorhizobium_meliloti_AK83_chromosome_3_NC_015591                                | IS66a | 7  | 2  | 5  | 4,53E-001 |
| Proteobacteria | Photobacterium_profundum_SS9_chromosome_1_NC_006370                               | IS66a | 6  | 2  | 4  | 6,88E-001 |
| Firmicutes     | Ruminococcus_albus_7_chromosome_NC_014833                                         | IS66a | 8  | 5  | 3  | 7,27E-001 |
| Proteobacteria | Burkholderia_xenovorans_LB400_chromosome_1_NC_007951                              | IS66a | 10 | 4  | 6  | 7,54E-001 |
| Proteobacteria | Vibrio_anguillarum_775_chromosome_chromosome_I_NC_015633                          | IS66a | 10 | 4  | 6  | 7,54E-001 |
| Proteobacteria | Shigella_boydii_CDC_3083-94_chromosome_NC_010658                                  | IS66a | 43 | 23 | 20 | 7,61E-001 |
| Proteobacteria | Vibrio_harveyi_ATCC_BAA-1116_chromosome_chromosome_I_NC_009783                    | IS66a | 34 | 18 | 16 | 8,64E-001 |
| Proteobacteria | Aliivibrio_salmonicida_LF11238_chromosome_chromosome_1_NC_011312                  | IS66a | 40 | 21 | 19 | 8,75E-001 |
| Proteobacteria | Acetobacter_pasteurianus_IFO_3283-01_NC_013209                                    | IS66a | 6  | 3  | 3  | 1,00E+000 |
| Bacteroidetes  | Bacteroides_vulgatus_ATCC_8482_chromosome_NC_009614                               | IS66a | 6  | 3  | 3  | 1,00E+000 |
| Proteobacteria | Bradyrhizobium_sp._BTAi1_chromosome_NC_009485                                     | IS66a | 8  | 4  | 4  | 1,00E+000 |
| Proteobacteria | Cellvibrio_japonicus_Ueda107_chromosome_NC_010995                                 | IS66a | 12 | 6  | 6  | 1,00E+000 |
| Proteobacteria | Ochrobactrum_anthropi_ATCC_49188_chromosome_chromosome_1_NC_009667                | IS66a | 6  | 3  | 3  | 1,00E+000 |
| Proteobacteria | Pseudomonas_fluorescens_F113_chromosome_NC_016830                                 | IS66a | 8  | 4  | 4  | 1,00E+000 |
| Proteobacteria | Pseudomonas_putida_KT2440_chromosome_NC_002947                                    | IS66a | 12 | 6  | 6  | 1,00E+000 |
| Proteobacteria | Rhodobacter_sphaeroides_ATCC_17025_chromosome_NC_009428                           | IS66a | 6  | 3  | 3  | 1,00E+000 |
| Proteobacteria | Roseobacter_litoralis_Och_149_chromosome_NC_015730                                | IS66a | 6  | 3  | 3  | 1,00E+000 |
| Proteobacteria | Sorangium_cellulosum_'So_ce_56'_chromosome_NC_010162                              | IS66a | 12 | 6  | 6  | 1,00E+000 |
| Proteobacteria | Alcanivorax_dieselolei_B5_chromosome_NC_018691                                    | IS66a | 7  | 3  | 4  | 1,00E+000 |
| Firmicutes     | Alicyclobacillus_acidocaldarius_subsp._acidocaldarius_Tc-4-1_chromosome_NC_017167 | IS66a | 11 | 6  | 5  | 1,00E+000 |
| Proteobacteria | Aromatoleum_aromaticum_EbN1_chromosome_NC_006513                                  | IS66a | 9  | 5  | 4  | 1,00E+000 |
| Bacteroidetes  | Bacteroides_salanitronis_DSM_18170_chromosome_NC_015164                           | IS66a | 7  | 4  | 3  | 1,00E+000 |
| Actinobacteria | Frankia_sp._Ccl3_chromosome_NC_007777                                             | IS66a | 7  | 3  | 4  | 1,00E+000 |
| Proteobacteria | Nitrosomonas_sp._AL212_chromosome_NC_015222                                       | IS66a | 11 | 5  | 6  | 1,00E+000 |
| Proteobacteria | Pseudomonas_mendocina_ymc_chromosome_NC_009439                                    | IS66a | 11 | 5  | 6  | 1,00E+000 |
| Proteobacteria | Pseudomonas_stutzeri_A1501_chromosome_NC_009434                                   | IS66a | 7  | 4  | 3  | 1,00E+000 |
| Proteobacteria | Pusillimonas_sp._T7-7_chromosome_NC_015458                                        | IS66a | 9  | 5  | 4  | 1,00E+000 |
| Proteobacteria | Rhizobium_etli_CFN_42_NC_007761                                                   | IS66a | 7  | 4  | 3  | 1,00E+000 |
| Proteobacteria | Shewanella_putrefaciens_200_chromosome_NC_017566                                  | IS66a | 9  | 4  | 5  | 1,00E+000 |
| Bacteroidetes  | Belliella_baltica_DSM_15883_chromosome_NC_018010                                  | IS66b | 20 | 13 | 7  | 2,63E-001 |
| Firmicutes     | Anoxybacillus_flavithermus_WK1_chromosome_NC_011567                               | IS66b | 9  | 3  | 6  | 5,08E-001 |
| Cyanobacteria  | Cyanothece_sp._PCC_7425_chromosome_NC_011884                                      | IS66b | 21 | 12 | 9  | 6,64E-001 |
| Actinobacteria | Frankia_sp._Ccl3_chromosome_NC_007777                                             | IS66b | 8  | 3  | 5  | 7,27E-001 |
| Actinobacteria | Frankia_symbiont_of_Datisca_glomerata_chromosome_NC_015656                        | IS66b | 26 | 12 | 14 | 8,45E-001 |
| Proteobacteria | Methylobacterium_nodulans_ORIS_2060_chromosome_NC_011894                          | IS66b | 6  | 3  | 3  | 1,00E+000 |

|                     |                                                                                         |       |     |    |    |           |
|---------------------|-----------------------------------------------------------------------------------------|-------|-----|----|----|-----------|
| Proteobacteria      | Wolbachia_sp._wRi_NC_012416                                                             | IS66b | 22  | 11 | 11 | 1,00E+000 |
| Firmicutes          | Geobacillus_sp._WCH70_chromosome_NC_012793                                              | IS66b | 9   | 5  | 4  | 1,00E+000 |
| Proteobacteria      | Xanthomonas_oryzae_pv._oryzae_PXO99A_chromosome_NC_010717                               | IS701 | 95  | 33 | 62 | 3,83E-003 |
| Proteobacteria      | Magnetococcus_sp._MC-1_chromosome_NC_008576                                             | IS701 | 18  | 15 | 3  | 7,54E-003 |
| Actinobacteria      | Streptomyces_avermitilis_MA-4680_NC_003155                                              | IS701 | 12  | 2  | 10 | 3,86E-002 |
| Cyanobacteria       | Synechocystis_sp._PCC_6803_chromosome_NC_000911                                         | IS701 | 9   | 2  | 7  | 1,80E-001 |
| Firmicutes          | Alkaliphilus_metalliredigens_QYMF_chromosome_NC_009633                                  | IS701 | 8   | 6  | 2  | 2,89E-001 |
| Proteobacteria      | Acetobacter_pasteurianus_IFO_3283-01_NC_013209                                          | IS701 | 10  | 7  | 3  | 3,44E-001 |
| Actinobacteria      | Kitasatospora_setae_KM-6054_NC_016109                                                   | IS701 | 10  | 3  | 7  | 3,44E-001 |
| Firmicutes          | Lactobacillus_delbrueckii_subsp._bulgaricus_ND02_chromosome_NC_014727                   | IS701 | 10  | 7  | 3  | 3,44E-001 |
| Actinobacteria      | Streptomyces_bingchenggensis_BCW-1_chromosome_NC_016582                                 | IS701 | 10  | 7  | 3  | 3,44E-001 |
| Actinobacteria      | Actinoplanes_missouriensis_431_NC_017093                                                | IS701 | 12  | 8  | 4  | 3,88E-001 |
| Firmicutes          | Clostridium_clariflavum_DSM_19732_chromosome_NC_016627                                  | IS701 | 14  | 5  | 9  | 4,24E-001 |
| Deferribacteres     | Denitrovibrio_acetiphilus_DSM_12809_chromosome_NC_013943                                | IS701 | 14  | 9  | 5  | 4,24E-001 |
| Cyanobacteria       | Microcystis_aeruginosa_NIES-843_chromosome_NC_010296                                    | IS701 | 35  | 20 | 15 | 5,00E-001 |
| Proteobacteria      | Thiocystis_violascens_DSM_198_chromosome_NC_018012                                      | IS701 | 11  | 4  | 7  | 5,49E-001 |
| Actinobacteria      | Frankia_sp._Ccl3_chromosome_NC_007777                                                   | IS701 | 15  | 9  | 6  | 6,07E-001 |
| Proteobacteria      | Desulfomonile_tiedjei_DSM_6799_chromosome_NC_018025                                     | IS701 | 17  | 7  | 10 | 6,29E-001 |
| Proteobacteria      | Myxococcus_xanthus_DK_1622_chromosome_NC_008095                                         | IS701 | 6   | 2  | 4  | 6,88E-001 |
| Proteobacteria      | Xenorhabdus_bovienii_SS-2004_chromosome_NC_013892                                       | IS701 | 6   | 4  | 2  | 6,88E-001 |
| Actinobacteria      | Streptomyces_hygroscopicus_subsp._jinggangensis_5008_chromosome_NC_017765               | IS701 | 25  | 11 | 14 | 6,90E-001 |
| Proteobacteria      | Geobacter_uraniireducens_Rf4_chromosome_NC_009483                                       | IS701 | 8   | 3  | 5  | 7,27E-001 |
| Cyanobacteria       | Nostoc_punctiforme_PCC_73102_chromosome_NC_010628                                       | IS701 | 10  | 6  | 4  | 7,54E-001 |
| Cyanobacteria       | Acaryochloris_marina_MBIC11017_chromosome_NC_009925                                     | IS701 | 22  | 11 | 11 | 1,00E+000 |
| Planctomycetes      | Rhodopirellula_baltica_SH_1_chromosome_NC_005027                                        | IS701 | 10  | 5  | 5  | 1,00E+000 |
| Proteobacteria      | Sulfurospirillum_deleyianum_DSM_6946_chromosome_NC_013512                               | IS701 | 8   | 4  | 4  | 1,00E+000 |
| Actinobacteria      | Actinoplanes_sp._SE50/110_chromosome_NC_017803                                          | IS701 | 9   | 5  | 4  | 1,00E+000 |
| Chloroflexi         | Roseiflexus_castenholzii_DSM_13941_chromosome_NC_009767                                 | IS701 | 7   | 3  | 4  | 1,00E+000 |
| Proteobacteria      | Stigmatella_aurantiaca_DW4/3-1_chromosome_NC_014623                                     | IS701 | 7   | 4  | 3  | 1,00E+000 |
| Fusobacteria        | Streptobacillus_moniliformis_DSM_12112_chromosome_NC_013515                             | IS91  | 10  | 0  | 10 | 1,95E-003 |
| Proteobacteria      | Shigella_flexneri_2002017_chromosome_NC_017328                                          | IS91  | 7   | 0  | 7  | 1,56E-002 |
| Proteobacteria      | Vibrio_anguillarum_775_chromosome_II_NC_015637                                          | IS91  | 6   | 0  | 6  | 3,13E-002 |
| Proteobacteria      | Geobacter_uraniireducens_Rf4_chromosome_NC_009483                                       | IS91  | 8   | 1  | 7  | 7,03E-002 |
| Proteobacteria      | Photobacterium_profundum_SS9_chromosome_2_NC_006371                                     | IS91  | 6   | 1  | 5  | 2,19E-001 |
| Planctomycetes      | Rhodopirellula_baltica_SH_1_chromosome_NC_005027                                        | IS91  | 9   | 3  | 6  | 5,08E-001 |
| Proteobacteria      | Aliivibrio_salmonicida_LF11238_chromosome_chromosome_2_NC_011313                        | IS91  | 21  | 12 | 9  | 6,64E-001 |
| Proteobacteria      | Sorangium_cellulosum_'So_ce_56'_chromosome_NC_010162                                    | IS91  | 6   | 2  | 4  | 6,88E-001 |
| Proteobacteria      | Desulfobacula_toluolica_Tol2_NC_018645                                                  | IS91  | 10  | 6  | 4  | 7,54E-001 |
| Proteobacteria      | Desulfobacterium_autotrophicum_HRM2_chromosome_NC_012108                                | IS91  | 10  | 5  | 5  | 1,00E+000 |
| Firmicutes          | Oscillibacter_valericigenes_Sjm18-20_NC_016048                                          | IS91  | 9   | 5  | 4  | 1,00E+000 |
| Proteobacteria      | Aliivibrio_salmonicida_LF11238_chromosome_chromosome_1_NC_011312                        | IS91  | 21  | 10 | 11 | 1,00E+000 |
| Proteobacteria      | Photorhabdus_asymbiotica_subsp._asymbiotica_ATCC_43949_chromosome_NC_012962             | IS982 | 8   | 1  | 7  | 7,03E-002 |
| Proteobacteria      | Acinetobacter_baumannii_SDF_chromosome_NC_010400                                        | IS982 | 141 | 79 | 62 | 1,78E-001 |
| Bacteroidetes       | Bacteroides_vulgatus_ATCC_8482_chromosome_NC_009614                                     | IS982 | 6   | 5  | 1  | 2,19E-001 |
| Firmicutes          | Geobacillus_thermoglucosidasius_C56-YS93_chromosome_NC_015660                           | IS982 | 6   | 1  | 5  | 2,19E-001 |
| Proteobacteria      | Xenorhabdus_bovienii_SS-2004_chromosome_NC_013892                                       | IS982 | 8   | 2  | 6  | 2,89E-001 |
| Proteobacteria      | Candidatus_Rickettsia_amblyommii_str._GAT-30V_chromosome_NC_017028                      | IS982 | 12  | 8  | 4  | 3,88E-001 |
| Firmicutes          | Lactobacillus_helveticus_DPC_4571_NC_010080                                             | IS982 | 12  | 8  | 4  | 3,88E-001 |
| Bacteroidetes       | Prevotella_intermedia_17_chromosome_chromosome_I_NC_017860                              | IS982 | 7   | 5  | 2  | 4,53E-001 |
| Firmicutes          | Clostridium_cellulovorans_743B_chromosome_NC_014393                                     | IS982 | 29  | 12 | 17 | 4,58E-001 |
| Firmicutes          | Geobacillus_sp._WCH70_chromosome_NC_012793                                              | IS982 | 20  | 8  | 12 | 5,03E-001 |
| Proteobacteria      | Aliivibrio_salmonicida_LF11238_chromosome_chromosome_1_NC_011312                        | IS982 | 43  | 19 | 24 | 5,42E-001 |
| Proteobacteria      | Wolbachia_endosymbiont_of_Culex_quinquefasciatus_Pel_chromosome_NC_010981               | IS982 | 46  | 25 | 21 | 6,59E-001 |
| Firmicutes          | Geobacillus_kaustophilus_HTA426_chromosome_NC_006510                                    | IS982 | 6   | 2  | 4  | 6,88E-001 |
| Firmicutes          | Lactobacillus_amylovorus_GRL_1112_chromosome_NC_014724                                  | IS982 | 6   | 2  | 4  | 6,88E-001 |
| Proteobacteria      | Nitrosomonas_europaea_ATCC_19718_chromosome_NC_004757                                   | IS982 | 6   | 4  | 2  | 6,88E-001 |
| Proteobacteria      | Shewanella_denitrificans_OS217_NC_007954                                                | IS982 | 8   | 5  | 3  | 7,27E-001 |
| Firmicutes          | Streptococcus_dysgalactiae_subsp._equisimilis_GGS_124_chromosome_chromosome_1_NC_010101 | IS982 | 8   | 5  | 3  | 7,27E-001 |
| Proteobacteria      | Candidatus_Midichloria_mitochondrii_IricVA_chromosome_NC_015722                         | IS982 | 39  | 18 | 21 | 7,49E-001 |
| Bacteroidetes       | Candidatus_Amoebophilus_asiaticus_5a2_chromosome_NC_010830                              | IS982 | 10  | 6  | 4  | 7,54E-001 |
| Proteobacteria      | Rickettsia_massiliae_str._AZT80_chromosome_NC_016931                                    | IS982 | 10  | 6  | 4  | 7,54E-001 |
| Proteobacteria      | Methylophaga_sp._JAM1_chromosome_NC_017857                                              | IS982 | 12  | 7  | 5  | 7,74E-001 |
| Bacteroidetes       | Flavobacterium_columnare_ATCC_49512_chromosome_NC_016510                                | IS982 | 14  | 8  | 6  | 7,91E-001 |
| Proteobacteria      | Xenorhabdus_nematophila_ATCC_19061_chromosome_NC_014228                                 | IS982 | 16  | 9  | 7  | 8,04E-001 |
| Chlamydiae          | Candidatus_Protochlamydia_amoebophila_UWE25_chromosome_NC_005861                        | IS982 | 20  | 11 | 9  | 8,24E-001 |
| Proteobacteria      | Aliivibrio_salmonicida_LF11238_chromosome_chromosome_2_NC_011313                        | IS982 | 14  | 7  | 7  | 1,00E+000 |
| Firmicutes          | Geobacillus_thermoleovorans_CCB_US3_UF5_chromosome_NC_016593                            | IS982 | 10  | 5  | 5  | 1,00E+000 |
| Deinococcus-Thermus | Meiothermus_ruber_DSM_1279_chromosome_NC_013946                                         | IS982 | 6   | 3  | 3  | 1,00E+000 |
| Proteobacteria      | Psychrobacter_arcticus_273-4_chromosome_NC_007204                                       | IS982 | 10  | 5  | 5  | 1,00E+000 |
| Proteobacteria      | Rickettsia_rhipicephali_str._3-7-female6-CWPP_chromosome_NC_017042                      | IS982 | 12  | 6  | 6  | 1,00E+000 |
| Firmicutes          | Clostridium_thermocellum_ATCC_27405_chromosome_NC_009012                                | IS982 | 7   | 4  | 3  | 1,00E+000 |
| Bacteroidetes       | Haliscomenobacter_hydrossis_DSM_1100_chromosome_NC_015510                               | IS982 | 7   | 3  | 4  | 1,00E+000 |
| Cyanobacteria       | Nostoc_sp._PCC_7120_chromosome_NC_003272                                                | IS982 | 9   | 5  | 4  | 1,00E+000 |
| Proteobacteria      | Photorhabdus_luminescens_subsp._laumondii_TTO1_NC_005126                                | IS982 | 17  | 9  | 8  | 1,00E+000 |
| Bacteroidetes       | Prevotella_intermedia_17_chromosome_chromosome_II_NC_017861                             | IS982 | 15  | 7  | 8  | 1,00E+000 |
| Actinobacteria      | Pseudonocardia_dioxanivorans_CB1190_chromosome_NC_015312                                | IS982 | 7   | 3  | 4  | 1,00E+000 |
| Aquificae           | Sulfurihydrogenibium_azorense_Az-Fu1_chromosome_NC_012438                               | IS982 | 7   | 3  | 4  | 1,00E+000 |
| Proteobacteria      | Orientia_tsutsugamushi_str._lkeda_NC_010793                                             | IS982 | 49  | 25 | 24 | 1,00E+000 |
| Bacteroidetes       | Porphyromonas_gingivalis_ATCC_33277_NC_010729                                           | IS982 | 27  | 14 | 13 | 1,00E+000 |
| Firmicutes          | Streptococcus_pyogenes_MGAS9429_chromosome_NC_008021                                    | ISAs1 | 8   | 8  | 0  | 7,81E-003 |
| Proteobacteria      | Escherichia_coli_ETEC_H10407_NC_017633                                                  | ISAs1 | 7   | 7  | 0  | 1,56E-002 |
| Firmicutes          | Bacillus_coagulans_36D1_chromosome_NC_016023                                            | ISAs1 | 6   | 6  | 0  | 3,13E-002 |
| Proteobacteria      | Thiocystis_violascens_DSM_198_chromosome_NC_018012                                      | ISAs1 | 23  | 6  | 17 | 3,47E-002 |
| Proteobacteria      | Acidiphilium_multivorum_AIU301_NC_015186                                                | ISAs1 | 6   | 5  | 1  | 2,19E-001 |

|                     |                                                                        |         |     |     |    |           |
|---------------------|------------------------------------------------------------------------|---------|-----|-----|----|-----------|
| Firmicutes          | Geobacillus_sp._WCH70_chromosome_NC_012793                             | ISAs1   | 18  | 12  | 6  | 2,38E-001 |
| Firmicutes          | Kyrpidia_tusciae_DSM_2912_chromosome_NC_014098                         | ISAs1   | 8   | 6   | 2  | 2,89E-001 |
| Actinobacteria      | Mycobacterium_ulcerans_Agy99_chromosome_NC_008611                      | ISAs1   | 185 | 100 | 85 | 3,03E-001 |
| Deinococcus-Thermus | Meiothermus_silvanus_DSM_9946_chromosome_NC_014212                     | ISAs1   | 24  | 15  | 9  | 3,07E-001 |
| Cyanobacteria       | Microcystis_aeruginosa_NIES-843_chromosome_NC_010296                   | ISAs1   | 19  | 12  | 7  | 3,59E-001 |
| Proteobacteria      | Aromatoleum_aromaticum_EbN1_chromosome_NC_006513                       | ISAs1   | 12  | 8   | 4  | 3,88E-001 |
| Proteobacteria      | Rhodospirillum_centenum_SW_chromosome_NC_011420                        | ISAs1   | 14  | 5   | 9  | 4,24E-001 |
| Proteobacteria      | Nitrosomonas_sp._Is79A3_chromosome_NC_015731                           | ISAs1   | 7   | 2   | 5  | 4,53E-001 |
| Deinococcus-Thermus | Thermus_scotoductus_SA-01_chromosome_NC_014974                         | ISAs1   | 7   | 2   | 5  | 4,53E-001 |
| Proteobacteria      | Xenorhabdus_nematophila_ATCC_19061_chromosome_NC_014228                | ISAs1   | 7   | 5   | 2  | 4,53E-001 |
| Actinobacteria      | Frankia_sp._Ccl3_chromosome_NC_007777                                  | ISAs1   | 31  | 13  | 18 | 4,73E-001 |
| Proteobacteria      | Azospirillum_sp._B510_chromosome_NC_013854                             | ISAs1   | 9   | 3   | 6  | 5,08E-001 |
| Proteobacteria      | Legionella_pneumophila_subsp._pneumophila_NC_018140                    | ISAs1   | 9   | 6   | 3  | 5,08E-001 |
| Proteobacteria      | Acidithiobacillus_ferroxidans_ATCC_53993_chromosome_NC_011206          | ISAs1   | 24  | 10  | 14 | 5,41E-001 |
| Cyanobacteria       | Cyanothece_sp._PCC_7425_chromosome_NC_011884                           | ISAs1   | 6   | 2   | 4  | 6,88E-001 |
| Firmicutes          | Streptococcus_agalactiae_2603V/R_chromosome_NC_004116                  | ISAs1   | 6   | 4   | 2  | 6,88E-001 |
| Firmicutes          | Streptococcus_dysgalactiae_subsp._equisimilis_RE378_NC_018712          | ISAs1   | 6   | 4   | 2  | 6,88E-001 |
| Chlamydiae          | Waddlia_chondrophila_WSU_86-1044_chromosome_NC_014225                  | ISAs1   | 6   | 4   | 2  | 6,88E-001 |
| Proteobacteria      | Xenorhabdus_bovienii_SS-2004_chromosome_NC_013892                      | ISAs1   | 8   | 3   | 5  | 7,27E-001 |
| Proteobacteria      | Shewanella_baltica_OS223_chromosome_NC_011663                          | ISAs1   | 34  | 18  | 16 | 8,64E-001 |
| Proteobacteria      | Alteromonas_sp._SN2_chromosome_NC_015554                               | ISAs1   | 8   | 4   | 4  | 1,00E+000 |
| Actinobacteria      | Micrococcus_phosphovorus_NM-1_NC_015635                                | ISAs1   | 12  | 6   | 6  | 1,00E+000 |
| Bacteroidetes       | Porphyromonas_gingivalis_W83_chromosome_NC_002950                      | ISAs1   | 6   | 3   | 3  | 1,00E+000 |
| Bacteroidetes       | Psychroflexus_torquis_ATCC_700755_chromosome_NC_018721                 | ISAs1   | 8   | 4   | 4  | 1,00E+000 |
| Proteobacteria      | Sinorhizobium_meliloti_SM11_chromosome_NC_017325                       | ISAs1   | 13  | 7   | 6  | 1,00E+000 |
| Proteobacteria      | Thauera_sp._MZ1T_chromosome_NC_011662                                  | ISAs1   | 7   | 3   | 4  | 1,00E+000 |
| Spirochaetes        | Treponema_succinifaciens_DSM_2489_chromosome_NC_015385                 | ISAs1   | 11  | 6   | 5  | 1,00E+000 |
| Cyanobacteria       | Nostoc_punctiforme_PCC_73102_chromosome_NC_010628                      | ISAzo13 | 9   | 7   | 2  | 1,80E-001 |
| Chlorobi            | Chlorobium_phaeobacteroides_DSM_266_chromosome_NC_008639               | ISAzo13 | 11  | 6   | 5  | 1,00E+000 |
| Cyanobacteria       | Microcystis_aeruginosa_NIES-843_chromosome_NC_010296                   | ISAzo13 | 17  | 8   | 9  | 1,00E+000 |
| Firmicutes          | Streptococcus_pneumoniae_JJA_NC_012466                                 | ISL3    | 20  | 0   | 20 | 1,91E-006 |
| Firmicutes          | Streptococcus_thermophilus_ND03_chromosome_NC_017563                   | ISL3    | 21  | 1   | 20 | 2,10E-005 |
| Firmicutes          | Lactobacillus_reuteri_SD2112_chromosome_NC_015697                      | ISL3    | 21  | 2   | 19 | 2,21E-004 |
| Firmicutes          | Streptococcus_macedonicus_ACA-DC_198_NC_016749                         | ISL3    | 23  | 3   | 20 | 4,88E-004 |
| Firmicutes          | Streptococcus_suis_D9_chromosome_NC_017620                             | ISL3    | 9   | 0   | 9  | 3,91E-003 |
| Firmicutes          | Bacillus_halodurans_C-125_chromosome_NC_002570                         | ISL3    | 40  | 29  | 11 | 6,43E-003 |
| Firmicutes          | Acidaminococcus_intestini_RyC-MR95_chromosome_NC_016077                | ISL3    | 32  | 8   | 24 | 7,00E-003 |
| Actinobacteria      | Gordonia_polyisoprenivorans_VH2_chromosome_NC_016906                   | ISL3    | 7   | 0   | 7  | 1,56E-002 |
| Firmicutes          | Lactobacillus_helveticus_R0052_chromosome_NC_018528                    | ISL3    | 19  | 4   | 15 | 1,92E-002 |
| Firmicutes          | Streptococcus_salivarius_CCHSS3_NC_015760                              | ISL3    | 10  | 1   | 9  | 2,15E-002 |
| Firmicutes          | Lactobacillus_crispatus_ST1_NC_014106                                  | ISL3    | 6   | 0   | 6  | 3,13E-002 |
| Firmicutes          | Enterococcus_faecium_DO_chromosome_NC_017960                           | ISL3    | 15  | 3   | 12 | 3,52E-002 |
| Proteobacteria      | Geobacter_metallireducens_GS-15_chromosome_NC_007517                   | ISL3    | 25  | 18  | 7  | 4,33E-002 |
| Firmicutes          | Clostridium_phytofermentans_ISDg_chromosome_NC_010001                  | ISL3    | 11  | 2   | 9  | 6,54E-002 |
| Proteobacteria      | Syntrophus_aciditrophicus_SB_chromosome_NC_007759                      | ISL3    | 13  | 10  | 3  | 9,23E-002 |
| Firmicutes          | Lactobacillus_amylovorus_GRL_1112_chromosome_NC_014724                 | ISL3    | 7   | 1   | 6  | 1,25E-001 |
| Firmicutes          | Acetobacterium_woodii_DSM_1030_chromosome_NC_016894                    | ISL3    | 9   | 7   | 2  | 1,80E-001 |
| Bacteroidetes       | Flavobacterium_columnare_ATCC_49512_chromosome_NC_016510               | ISL3    | 9   | 2   | 7  | 1,80E-001 |
| Firmicutes          | Geobacillus_sp._WCH70_chromosome_NC_012793                             | ISL3    | 9   | 2   | 7  | 1,80E-001 |
| Proteobacteria      | Pusillimonas_sp._T7-7_chromosome_NC_015458                             | ISL3    | 9   | 7   | 2  | 1,80E-001 |
| Chrysiogenetes      | Desulfurispirillum_indicum_S5_chromosome_NC_014836                     | ISL3    | 6   | 5   | 1  | 2,19E-001 |
| Firmicutes          | Enterococcus_faecalis_62_chromosome_NC_017312                          | ISL3    | 6   | 5   | 1  | 2,19E-001 |
| Firmicutes          | Lactobacillus_johnsonii_NCC_533_NC_005362                              | ISL3    | 6   | 1   | 5  | 2,19E-001 |
| Proteobacteria      | Pseudomonas_stutzeri_DSM_4166_chromosome_NC_017532                     | ISL3    | 11  | 8   | 3  | 2,27E-001 |
| Actinobacteria      | Arthrobacter_arilaitensis_Re117_chromosome_NC_014550                   | ISL3    | 45  | 27  | 18 | 2,33E-001 |
| Proteobacteria      | Burkholderia_mallei_ATCC_23344_chromosome_1_NC_006348                  | ISL3    | 13  | 4   | 9  | 2,67E-001 |
| Synergistetes       | Anaerobaculum_mobile_DSM_13181_chromosome_NC_018024                    | ISL3    | 8   | 6   | 2  | 2,89E-001 |
| Actinobacteria      | Intrasporangium_calvum_DSM_43043_chromosome_NC_014830                  | ISL3    | 8   | 6   | 2  | 2,89E-001 |
| Firmicutes          | Oceanobacillus_ihayensis_HTE831_chromosome_NC_004193                   | ISL3    | 8   | 6   | 2  | 2,89E-001 |
| Firmicutes          | Streptococcus_infantarius_subsp._infantarius_CJ18_chromosome_NC_016826 | ISL3    | 8   | 2   | 6  | 2,89E-001 |
| Firmicutes          | Staphylococcus_haemolyticus_JCSC1435_chromosome_NC_007168              | ISL3    | 33  | 13  | 20 | 2,96E-001 |
| Cyanobacteria       | Acaryochloris_marina_MBIC11017_chromosome_NC_009925                    | ISL3    | 10  | 7   | 3  | 3,44E-001 |
| Firmicutes          | Lactobacillus_buchneri_NRRL_B-30929_chromosome_NC_015428               | ISL3    | 19  | 7   | 12 | 3,59E-001 |
| Cyanobacteria       | Microcystis_aeruginosa_NIES-843_chromosome_NC_010296                   | ISL3    | 44  | 25  | 19 | 4,51E-001 |
| Proteobacteria      | Acidovorax_sp._JS42_chromosome_NC_008782                               | ISL3    | 7   | 5   | 2  | 4,53E-001 |
| Actinobacteria      | Mycobacterium_gilvum_PYR-GCK_chromosome_NC_009338                      | ISL3    | 7   | 2   | 5  | 4,53E-001 |
| Bacteroidetes       | Runella_slithyformis_DSM_19594_chromosome_NC_015703                    | ISL3    | 7   | 2   | 5  | 4,53E-001 |
| Firmicutes          | Staphylococcus_pseudintermedius_ED99_chromosome_NC_017568              | ISL3    | 7   | 5   | 2  | 4,53E-001 |
| Proteobacteria      | Geobacter_uraniireducens_Rf4_chromosome_NC_009483                      | ISL3    | 16  | 6   | 10 | 4,54E-001 |
| Actinobacteria      | Nakamurella_multipartita_DSM_44233_chromosome_NC_013235                | ISL3    | 18  | 7   | 11 | 4,81E-001 |
| Firmicutes          | Lactobacillus_casei_ATCC_334_NC_008526                                 | ISL3    | 9   | 3   | 6  | 5,08E-001 |
| Actinobacteria      | Mycobacterium_smegmatis_str._MC2_155_chromosome_NC_018289              | ISL3    | 22  | 9   | 13 | 5,23E-001 |
| Proteobacteria      | Pseudomonas_mendocina_ymc_chromosome_NC_009439                         | ISL3    | 13  | 5   | 8  | 5,81E-001 |
| Firmicutes          | Lactobacillus_salivarius_CECT_5713_chromosome_NC_017481                | ISL3    | 21  | 9   | 12 | 6,64E-001 |
| Actinobacteria      | Bifidobacterium_animalis_subsp._lactis_AD011_chromosome_NC_011835      | ISL3    | 6   | 2   | 4  | 6,88E-001 |
| Actinobacteria      | Corynebacterium_glutamicum_ATCC_13032_uid57905_NC_003450               | ISL3    | 6   | 4   | 2  | 6,88E-001 |
| Bacteroidetes       | Fluviicola_taffensis_DSM_16823_chromosome_NC_015321                    | ISL3    | 6   | 2   | 4  | 6,88E-001 |
| Actinobacteria      | Frankia_sp._EAN1pec_chromosome_NC_009921                               | ISL3    | 6   | 2   | 4  | 6,88E-001 |
| Firmicutes          | Lactobacillus_kefiranofaciens_ZW3_chromosome_NC_015602                 | ISL3    | 6   | 2   | 4  | 6,88E-001 |
| Proteobacteria      | Legionella_pneumophila_str._Corby_chromosome_NC_009494                 | ISL3    | 6   | 4   | 2  | 6,88E-001 |
| Actinobacteria      | Mycobacterium_bovis_AF2122/97_chromosome_NC_002945                     | ISL3    | 6   | 2   | 4  | 6,88E-001 |
| Actinobacteria      | Mycobacterium_tuberculosis_CDC1551_chromosome_NC_002755                | ISL3    | 6   | 4   | 2  | 6,88E-001 |
| Bacteroidetes       | Porphyromonas_asaccharolytica_DSM_20707_chromosome_NC_015501           | ISL3    | 6   | 4   | 2  | 6,88E-001 |
| Bacteroidetes       | Bacteroides_vulgatus_ATCC_8482_chromosome_NC_009614                    | ISL3    | 8   | 5   | 3  | 7,27E-001 |

|                |                                                                                  |        |    |    |    |           |
|----------------|----------------------------------------------------------------------------------|--------|----|----|----|-----------|
| Proteobacteria | Burkholderia_thailandensis_E264_chromosome_chromosome_I_NC_007651                | ISL3   | 8  | 5  | 3  | 7,27E-001 |
| Thermotogae    | Fervidobacterium_nodosum_Rt17-B1_chromosome_NC_009718                            | ISL3   | 8  | 3  | 5  | 7,27E-001 |
| Proteobacteria | Methylomicrobium_alcaliphilum_chromosome_NC_016112                               | ISL3   | 8  | 5  | 3  | 7,27E-001 |
| Chlorobi       | Chlorobium_phaeobacteroides_DSM_266_chromosome_NC_008639                         | ISL3   | 10 | 6  | 4  | 7,54E-001 |
| Firmicutes     | Geobacillus_thermodenitrificans_NG80-2_chromosome_NC_009328                      | ISL3   | 10 | 6  | 4  | 7,54E-001 |
| Firmicutes     | Staphylococcus_aureus_subsp._aureus_Mu50_chromosome_NC_002758                    | ISL3   | 10 | 6  | 4  | 7,54E-001 |
| Actinobacteria | Micrococcus_luteus_NCTC_2665_NC_012803                                           | ISL3   | 16 | 9  | 7  | 8,04E-001 |
| Actinobacteria | Kytococcus_sedentarius_DSM_20547_chromosome_NC_013169                            | ISL3   | 20 | 9  | 11 | 8,24E-001 |
| Proteobacteria | Bordetella_parapertussis_12822_chromosome_NC_002928                              | ISL3   | 22 | 12 | 10 | 8,32E-001 |
| Chlorobi       | Chlorobium_chlorochromatii_CaD3_chromosome_NC_007514                             | ISL3   | 14 | 7  | 7  | 1,00E+000 |
| Actinobacteria | Corynebacterium_variabile_DSM_44702_chromosome_NC_015859                         | ISL3   | 26 | 13 | 13 | 1,00E+000 |
| Proteobacteria | Desulfohalobium_retbaense_DSM_5692_chromosome_NC_013223                          | ISL3   | 10 | 5  | 5  | 1,00E+000 |
| Actinobacteria | Mycobacterium_sp._Spyr1_chromosome_NC_014814                                     | ISL3   | 8  | 4  | 4  | 1,00E+000 |
| Firmicutes     | Streptococcus_mitis_B6_NC_013853                                                 | ISL3   | 6  | 3  | 3  | 1,00E+000 |
| Proteobacteria | Xanthomonas_oryzae_pv._oryzae_KACC10331_chromosome_NC_006834                     | ISL3   | 20 | 10 | 10 | 1,00E+000 |
| Actinobacteria | Bifidobacterium_longum_subsp._infantis_ATCC_15697_NC_017219                      | ISL3   | 7  | 3  | 4  | 1,00E+000 |
| Actinobacteria | Brachybacterium_faecium_DSM_4810_chromosome_NC_013172                            | ISL3   | 7  | 4  | 3  | 1,00E+000 |
| Proteobacteria | Escherichia_coli_ABU_83972_chromosome_NC_017631                                  | ISL3   | 7  | 4  | 3  | 1,00E+000 |
| Firmicutes     | Geobacillus_thermoleovorans_CCB_US3_UF5_chromosome_NC_016593                     | ISL3   | 13 | 6  | 7  | 1,00E+000 |
| Actinobacteria | Gordonia_bronchialis_DSM_43247_chromosome_NC_013441                              | ISL3   | 7  | 3  | 4  | 1,00E+000 |
| Firmicutes     | Lactobacillus_fermentum_CECT_5716_chromosome_NC_017465                           | ISL3   | 9  | 4  | 5  | 1,00E+000 |
| Firmicutes     | Lactobacillus_plantarum_subsp._plantarum_ST-III_chromosome_NC_014554             | ISL3   | 9  | 4  | 5  | 1,00E+000 |
| Actinobacteria | Mycobacterium_canettii_CIPT_140010059_NC_015848                                  | ISL3   | 13 | 6  | 7  | 1,00E+000 |
| Proteobacteria | Acidithiobacillus_calidus_SM-1_chromosome_NC_015850                              | ISL3   | 39 | 20 | 19 | 1,00E+000 |
| Actinobacteria | Propionibacterium_freudenreichii_subsp._shermanii_CIRM-BIA1_chromosome_NC_014215 | ISL3   | 27 | 14 | 13 | 1,00E+000 |
| Firmicutes     | Caldicellulosiruptor_bescii_DSM_6725_chromosome_NC_012034                        | ISNCYa | 10 | 10 | 0  | 1,95E-003 |
| Firmicutes     | Bacillus_coagulans_36D1_chromosome_NC_016023                                     | ISNCYa | 11 | 10 | 1  | 1,17E-002 |
| Proteobacteria | Magnetococcus_sp._MC-1_chromosome_NC_008576                                      | ISNCYa | 10 | 9  | 1  | 2,15E-002 |
| Firmicutes     | Caldicellulosiruptor_kronotskyensis_2002_chromosome_NC_014720                    | ISNCYa | 6  | 6  | 0  | 3,13E-002 |
| Firmicutes     | Desulfotomaculum_kuznetsovii_DSM_6115_chromosome_NC_015573                       | ISNCYa | 12 | 10 | 2  | 3,86E-002 |
| Firmicutes     | Geobacillus_thermoleovorans_CCB_US3_UF5_chromosome_NC_016593                     | ISNCYa | 9  | 8  | 1  | 3,91E-002 |
| Firmicutes     | Desulfotomaculum_acetoxidans_DSM_771_chromosome_NC_013216                        | ISNCYa | 8  | 7  | 1  | 7,03E-002 |
| Firmicutes     | Thermoanaerobacterium_thermosaccharolyticum_DSM_571_chromosome_NC_014410         | ISNCYa | 8  | 7  | 1  | 7,03E-002 |
| Cyanobacteria  | Anabaena_variabilis_ATCC_29413_chromosome_NC_007413                              | ISNCYa | 7  | 1  | 6  | 1,25E-001 |
| Firmicutes     | Geobacillus_sp._Y412MC61_chromosome_NC_013411                                    | ISNCYa | 7  | 6  | 1  | 1,25E-001 |
| Proteobacteria | Sodalis_glossinidius_str._'morsitans'_chromosome_NC_007712                       | ISNCYa | 7  | 1  | 6  | 1,25E-001 |
| Firmicutes     | Caldicellulosiruptor_owensensis_OL_chromosome_NC_014657                          | ISNCYa | 6  | 5  | 1  | 2,19E-001 |
| Firmicutes     | Caldicellulosiruptor_saccharolyticus_DSM_8903_chromosome_NC_009437               | ISNCYa | 11 | 8  | 3  | 2,27E-001 |
| Firmicutes     | Moorella_thermoacetica_ATCC_39073_chromosome_NC_007644                           | ISNCYa | 8  | 2  | 6  | 2,89E-001 |
| Cyanobacteria  | Microcystis_aeruginosa_NIES-843_chromosome_NC_010296                             | ISNCYa | 26 | 16 | 10 | 3,27E-001 |
| Proteobacteria | Photorhabdus_luminescens_subsp._laumondii_TTO1_NC_005126                         | ISNCYa | 10 | 7  | 3  | 3,44E-001 |
| Cyanobacteria  | Nostoc_punctiforme_PCC_73102_chromosome_NC_010628                                | ISNCYa | 7  | 2  | 5  | 4,53E-001 |
| Aquificae      | Sulfurihydrogenibium_azorense_Az-Fu1_chromosome_NC_012438                        | ISNCYa | 11 | 4  | 7  | 5,49E-001 |
| Proteobacteria | Orientia_tsutsugamushi_str._lkeda_NC_010793                                      | ISNCYa | 17 | 7  | 10 | 6,29E-001 |
| Firmicutes     | Caldicellulosiruptor_hydrothermalis_108_chromosome_NC_014652                     | ISNCYa | 6  | 4  | 2  | 6,88E-001 |
| Proteobacteria | Escherichia_coli_ATCC_8739_chromosome_NC_010468                                  | ISNCYa | 6  | 4  | 2  | 6,88E-001 |
| Proteobacteria | Klebsiella_oxytoca_E718_chromosome_NC_018106                                     | ISNCYa | 6  | 4  | 2  | 6,88E-001 |
| Cyanobacteria  | Gloeobacter_violaceus_PCC_7421_chromosome_NC_005125                              | ISNCYa | 8  | 3  | 5  | 7,27E-001 |
| Proteobacteria | Rickettsia_bellii_RML369-C_chromosome_NC_007940                                  | ISNCYa | 8  | 3  | 5  | 7,27E-001 |
| Proteobacteria | Haliangium_ochraceum_DSM_14365_chromosome_NC_013440                              | ISNCYa | 12 | 5  | 7  | 7,74E-001 |
| Proteobacteria | Escherichia_fergusonii_ATCC_35469_chromosome_NC_011740                           | ISNCYa | 6  | 3  | 3  | 1,00E+000 |
| Proteobacteria | Klebsiella_pneumoniae_KCTC_2242_chromosome_NC_017540                             | ISNCYa | 6  | 3  | 3  | 1,00E+000 |
| Cyanobacteria  | Cyanothece_sp._PCC_7425_chromosome_NC_011884                                     | ISNCYa | 11 | 6  | 5  | 1,00E+000 |
| Proteobacteria | Klebsiella_pneumoniae_subsp._pneumoniae_MGH_78578_chromosome_NC_009648           | ISNCYa | 7  | 3  | 4  | 1,00E+000 |
| Cyanobacteria  | Nostoc_sp._PCC_7120_chromosome_NC_003272                                         | ISNCYa | 9  | 5  | 4  | 1,00E+000 |
| Actinobacteria | Corynebacterium_jeikeium_K411_chromosome_NC_007164                               | ISNCYb | 19 | 3  | 16 | 4,43E-003 |
| Actinobacteria | Corynebacterium_urealyticum_DSM_7109_chromosome_NC_010545                        | ISNCYb | 19 | 6  | 13 | 1,67E-001 |
| Actinobacteria | Corynebacterium_resistens_DSM_45100_chromosome_NC_015673                         | ISNCYb | 22 | 11 | 11 | 1,00E+000 |
| Proteobacteria | Xenorhabdus_nematophila_ATCC_19061_chromosome_NC_014228                          | Tn3    | 8  | 2  | 6  | 2,89E-001 |
| Proteobacteria | Acidovorax_sp._JS42_chromosome_NC_008782                                         | Tn3    | 6  | 3  | 3  | 1,00E+000 |
